# Supplementary material for: Prognostic and Predictive Utility of GPD1L in Human Hepatocellular Carcinoma
Source: MDPI journal article supplement (doi:10.3390/ijms241713113), 2023-08-23
Supplement: s1 [file s1]

**Table S4.** TCGA LIHC – GPD1L mTRNA Low vs High Groups

| Variable       | Overall, N = 359 <sup>1</sup> | high, N = 176 <sup>1</sup> | low, N = 183 <sup>1</sup> | p-value <sup>2</sup> |
|----------------|-------------------------------|----------------------------|---------------------------|----------------------|
| <b>TP53</b>    |                               |                            |                           | 0.016                |
| Mutant         | 111 (31%)                     | 65 (37%)                   | 46 (25%)                  |                      |
| WT             | 248 (69%)                     | 111 (63%)                  | 137 (75%)                 |                      |
| <b>CTNNB1</b>  |                               |                            |                           | <0.001               |
| Mutant         | 96 (27%)                      | 30 (17%)                   | 66 (36%)                  |                      |
| WT             | 263 (73%)                     | 146 (83%)                  | 117 (64%)                 |                      |
| <b>AXIN1</b>   |                               |                            |                           | 0.24                 |
| Mutant         | 23 (6.4%)                     | 14 (8.0%)                  | 9 (4.9%)                  |                      |
| WT             | 336 (94%)                     | 162 (92%)                  | 174 (95%)                 |                      |
| <b>ARID1A</b>  |                               |                            |                           | 0.91                 |
| Mutant         | 30 (8.4%)                     | 15 (8.5%)                  | 15 (8.2%)                 |                      |
| WT             | 329 (92%)                     | 161 (91%)                  | 168 (92%)                 |                      |
| <b>CDKN2A</b>  |                               |                            |                           | 0.14                 |
| Mutant         | 11 (3.1%)                     | 3 (1.7%)                   | 8 (4.4%)                  |                      |
| WT             | 348 (97%)                     | 173 (98%)                  | 175 (96%)                 |                      |
| <b>ARID2</b>   |                               |                            |                           | 0.20                 |
| Mutant         | 20 (5.6%)                     | 7 (4.0%)                   | 13 (7.1%)                 |                      |
| WT             | 339 (94%)                     | 169 (96%)                  | 170 (93%)                 |                      |
| <b>RPS6KA3</b> |                               |                            |                           | 0.24                 |
| Mutant         | 14 (3.9%)                     | 9 (5.1%)                   | 5 (2.7%)                  |                      |
| WT             | 345 (96%)                     | 167 (95%)                  | 178 (97%)                 |                      |

<sup>1</sup> n (%)

<sup>2</sup> Pearson's Chi-squared test

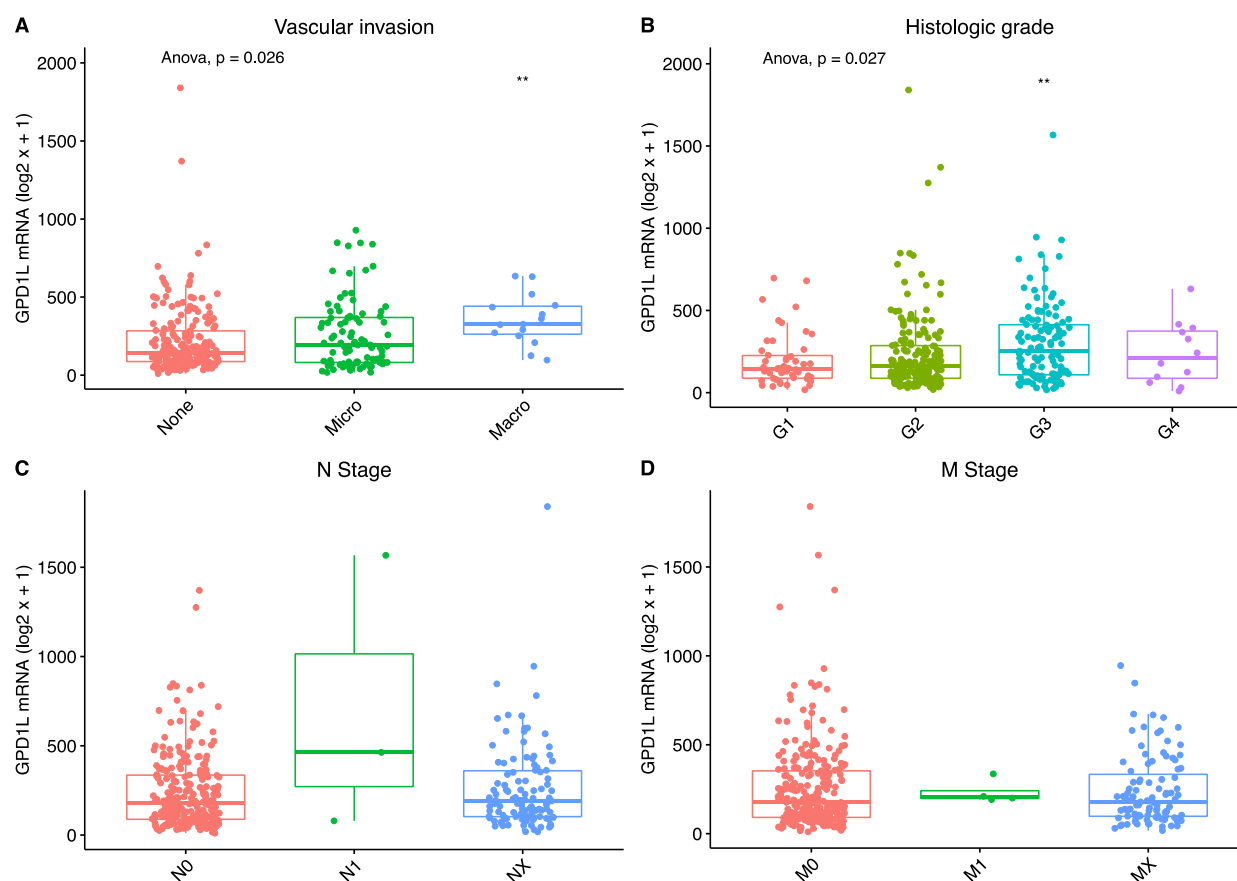

**Figure S1.** Association of GPD1L mRNA levels with clinicopathological factors (Dataset: TCGA-LIHC). A, Vascular Invasion; B, Histologic Grade; C, N Stage; D, M Stage. Statistical comparisons: Multi-group one-way Anova and 2-sided T-tests, with first category as the reference level (\*  $P < 0.05$ ; \*\*  $P < 0.005$ ) (only significant results shown).

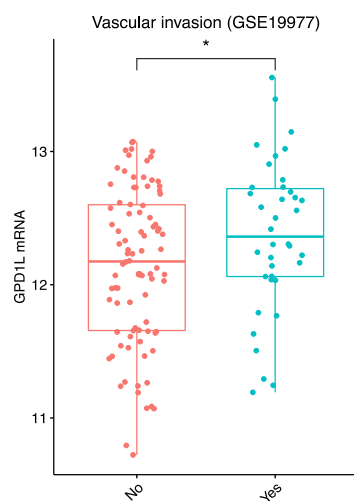

**Figure S2.** Association of GPD1L mRNA levels with presence or absence of vascular invasion (Dataset: GSE19977). (\*  $P < 0.05$ )

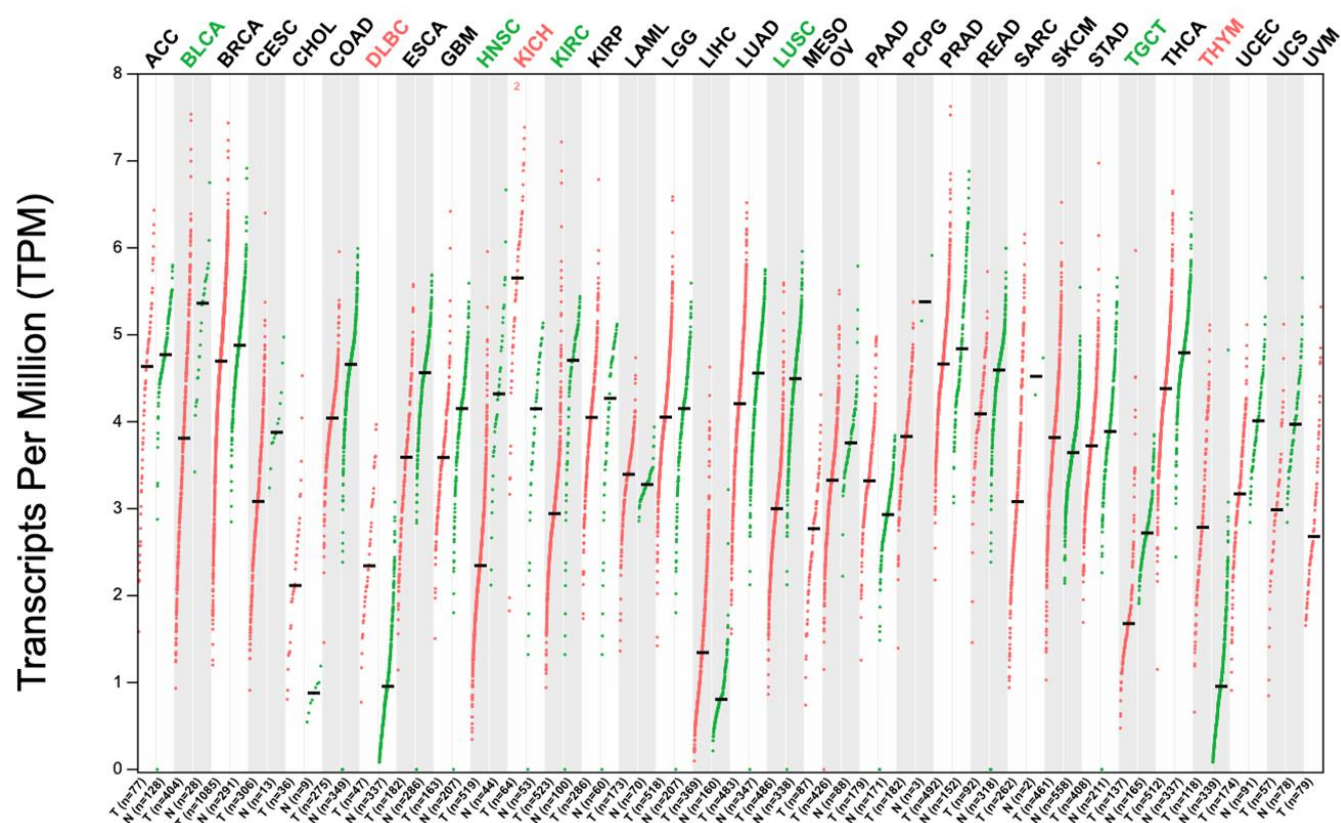

Figure S3. GPD1L mRNA levels in tumour and normal tissue in TCGA

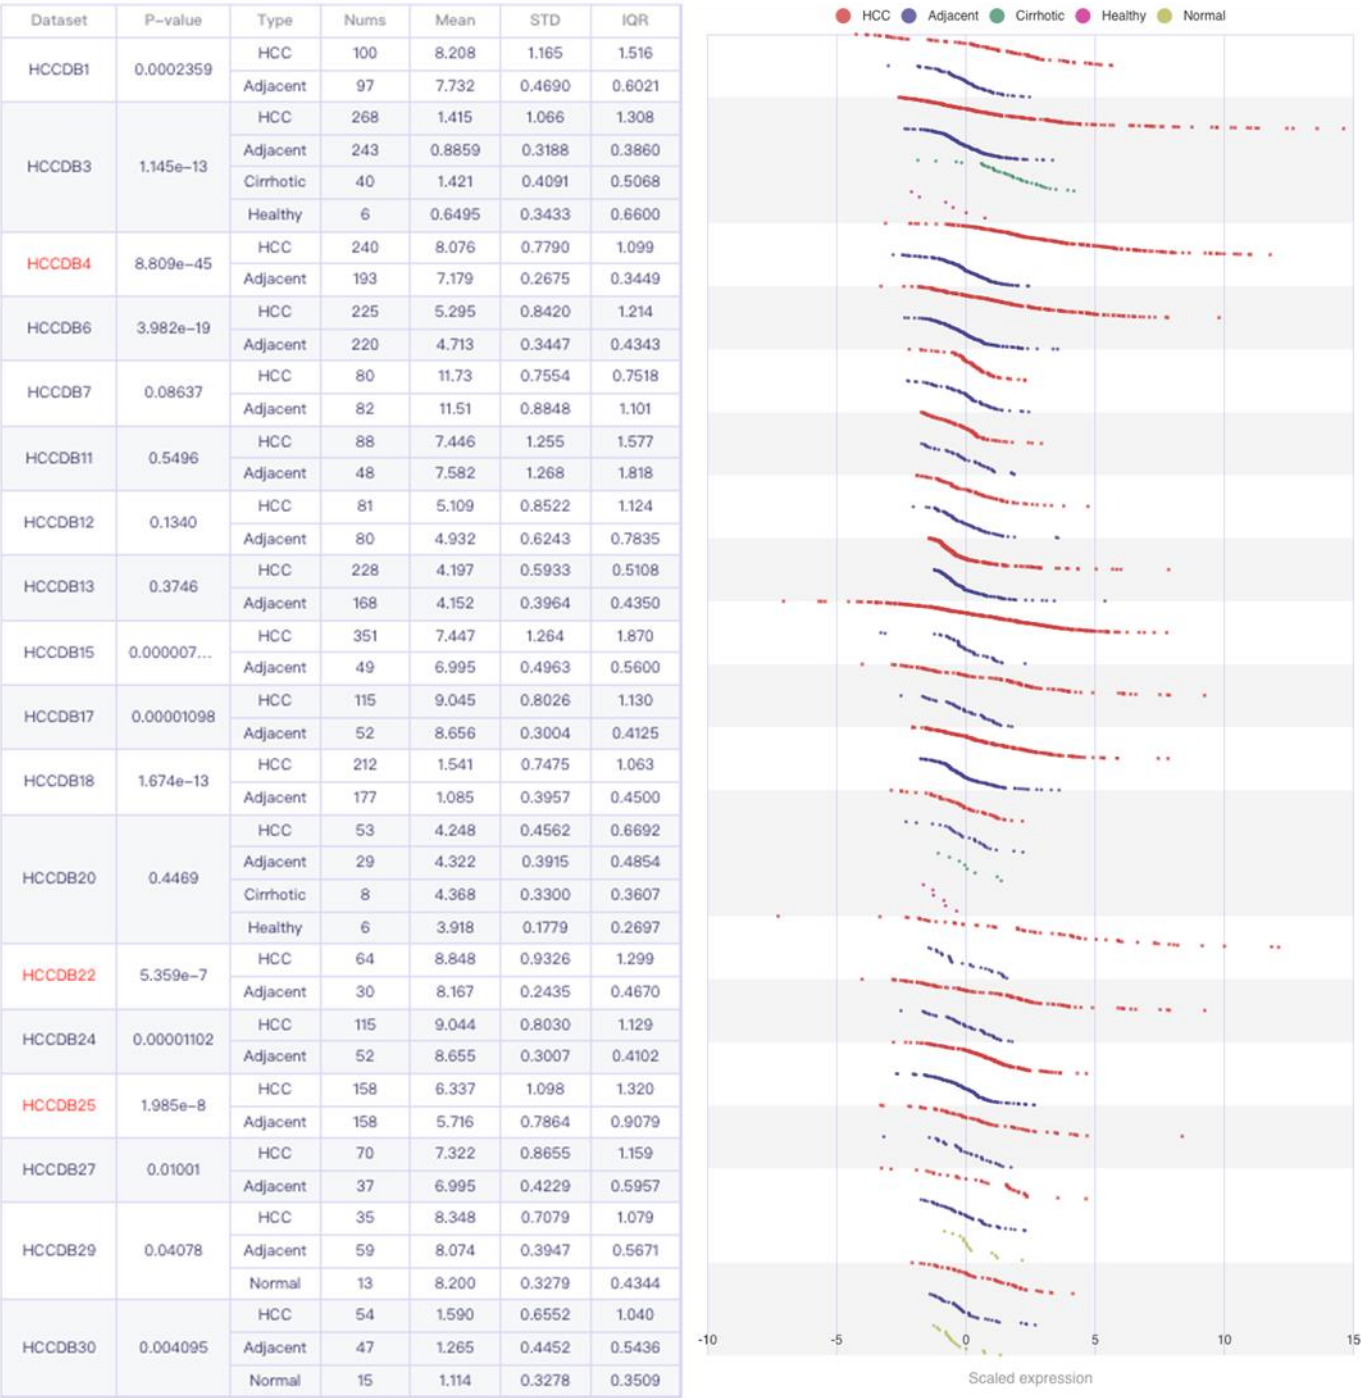

**Figure S4.** GPD1L mRNA levels in tumour and adjacent normal tissue in HCCDB v2.0 datasets.

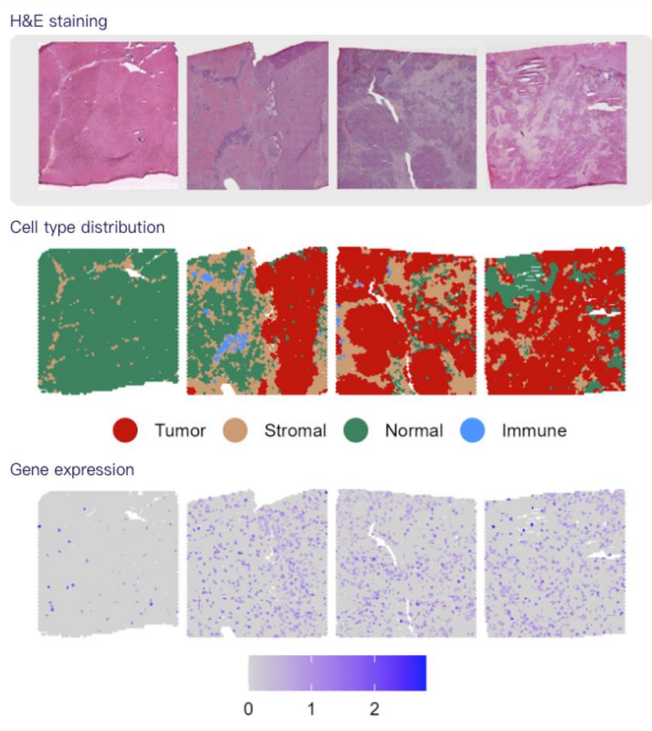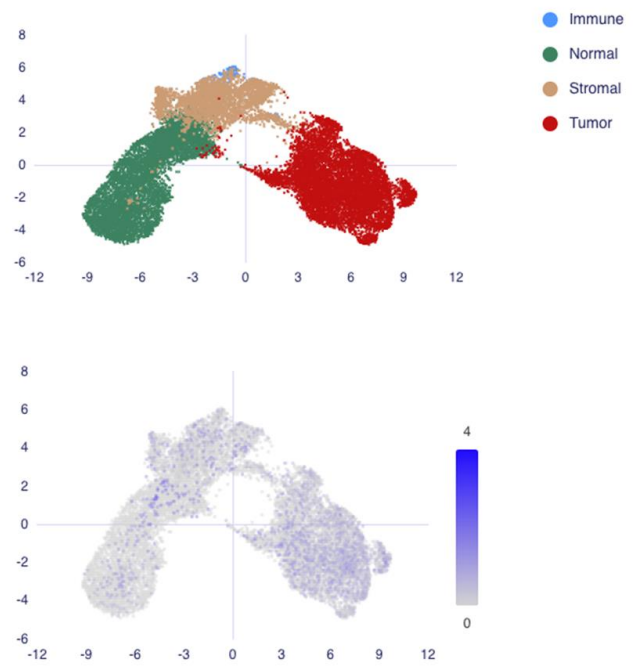

**Figure S5.** Spatial Transcriptomic HCC-2 dataset from HCCDB v2.0.



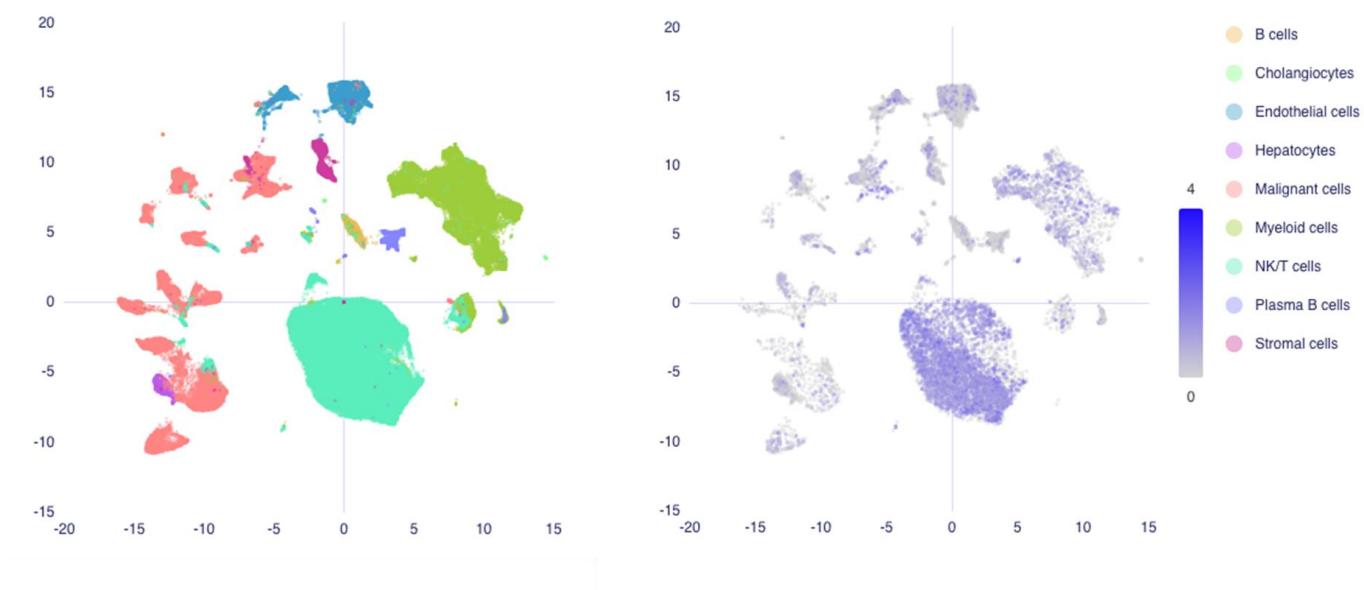

**Figure S6.** Single Cell RNA-Seq from HCCDB. tSNE plots showing cell population (left) and GPD1L expression in single cells marked in blue (right).

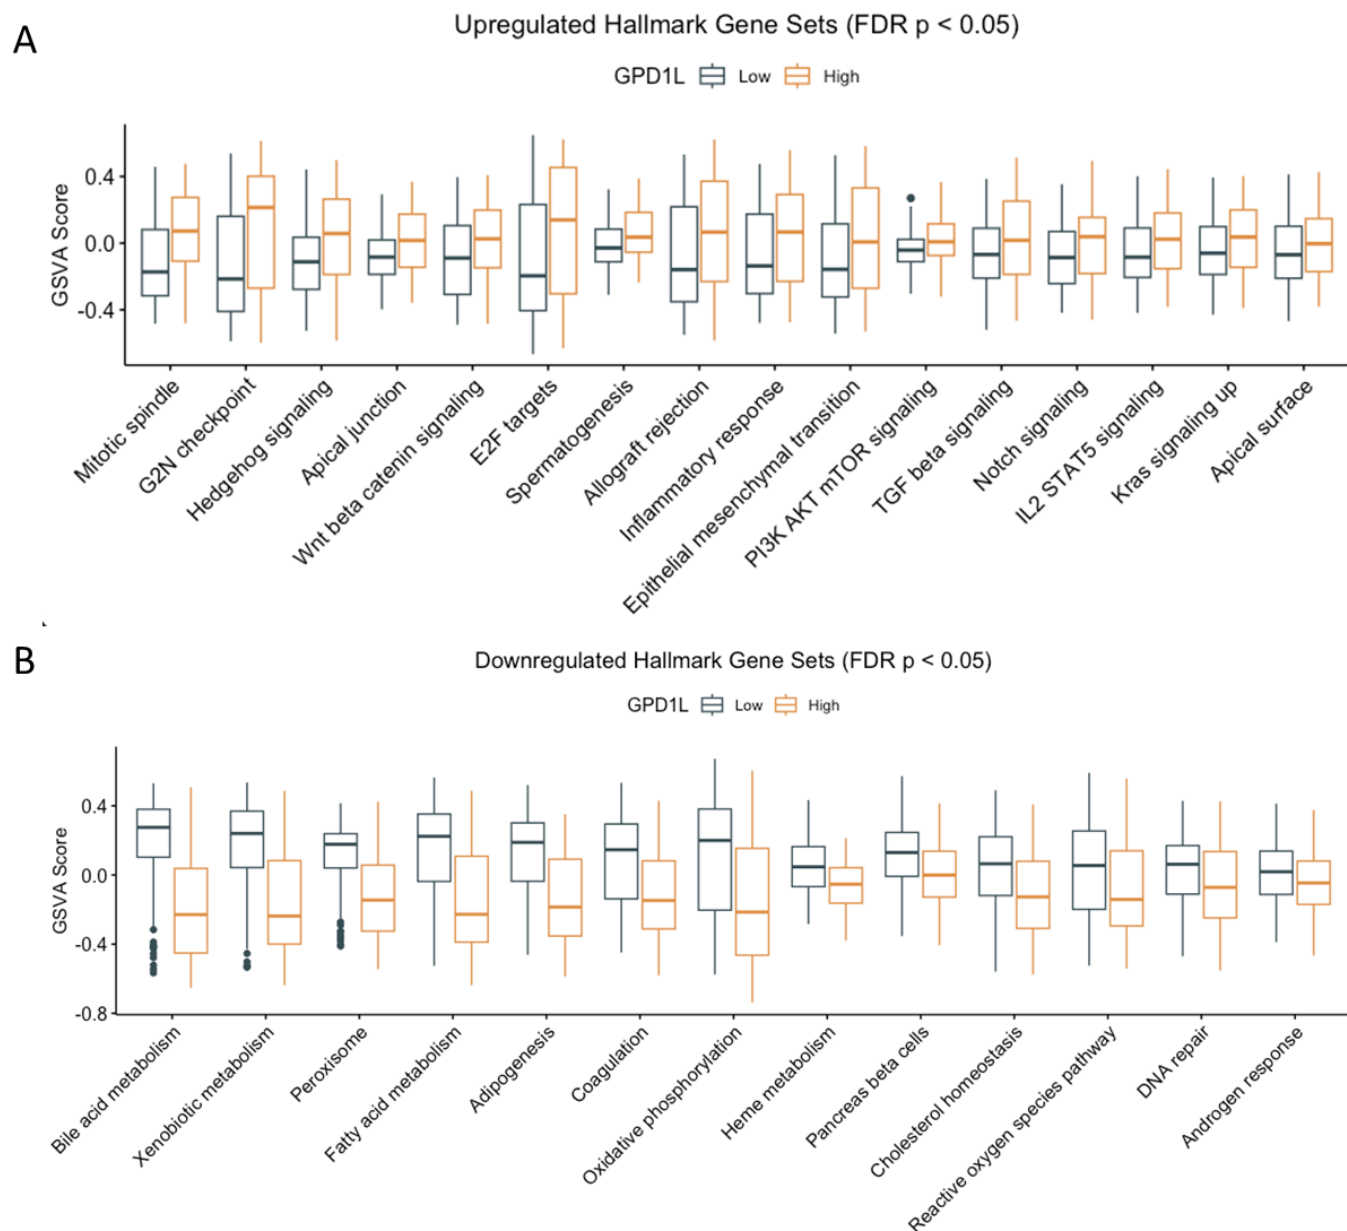

**Figure S7.** GSVA analysis of HALLMARK gene sets in TCGA-LIHC stratified by GPD1L mRNA levels.

| TF                                                   |             | stats                   |                                        |
|------------------------------------------------------|-------------|-------------------------|----------------------------------------|
| Term name                                            | Term ID     | p <sub>adj</sub>        | -log <sub>10</sub> (p <sub>adj</sub> ) |
| Factor: E2F-3; motif: GGCGGGN; match class: 1        | TF:M02089_1 | 7.577×10 <sup>-18</sup> | 16.12                                  |
| Factor: E2F-1; motif: NNNNGGCGGGAARN; match class... | TF:M09892_1 | 8.742×10 <sup>-10</sup> | 9.94                                   |
| Factor: E2F-4; motif: NNTTCCCGCCNN; match class: 1   | TF:M04823_1 | 3.629×10 <sup>-7</sup>  | 6.74                                   |
| Factor: E2F-6; motif: NGGCGGGGARRNN                  | TF:M09895   | 1.350×10 <sup>-6</sup>  | 6.17                                   |
| Factor: E2F-4; motif: NGGCGGGAARN; match class: 1    | TF:M07084_1 | 1.706×10 <sup>-4</sup>  | 3.52                                   |
| Factor: E2F-1; motif: NKTSSCGC                       | TF:M00428   | 8.327×10 <sup>-4</sup>  | 3.19                                   |
| Factor: E2F-4; motif: NTTTCSGCC; match class: 1      | TF:M07380_1 | 1.251×10 <sup>-3</sup>  | 2.89                                   |
| Factor: E2F-4; motif: GCGGGAAANA; match class: 1     | TF:M02090_1 | 2.594×10 <sup>-3</sup>  | 2.60                                   |

**Figure S8.** gProfiler functional enrichment analysis of genes with positive correlation with GPD1L in TCGA-LIHC.

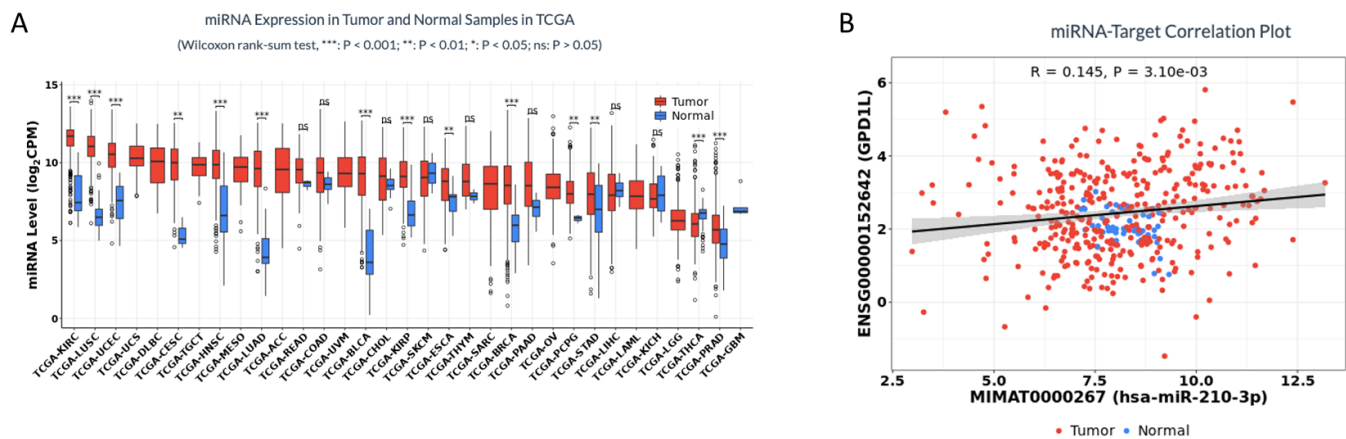

**Figure S9.** (A) miRNA expression in tumour and normal samples in the TCGA dataset. (B) Correlation plot for miR-210 and GPD1L expression in TCGA-LIHC.

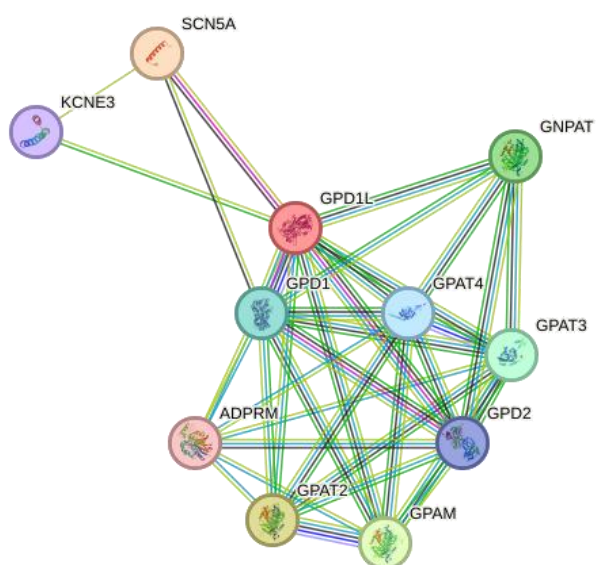

**Figure S10.** Protein-protein interaction network for GPD1L downloaded from STRING-DB

| REAC                     |                                  |                 |                                                                                   | stats                  |                           |     |  |  |  |  |  |
|--------------------------|----------------------------------|-----------------|-----------------------------------------------------------------------------------|------------------------|---------------------------|-----|--|--|--|--|--|
| <input type="checkbox"/> | Term name                        | Term ID         |  | Padj                   | -log <sub>10</sub> (Padj) |     |  |  |  |  |  |
|                          |                                  |                 |                                                                                   |                        | 0                         | ≤16 |  |  |  |  |  |
| <input type="checkbox"/> | Phospholipid metabolism          | REAC:R-HSA-1... |                                                                                   | 5.084×10 <sup>-7</sup> | <div></div>               |     |  |  |  |  |  |
| <input type="checkbox"/> | Glycerophospholipid biosynthesis | REAC:R-HSA-1... |                                                                                   | 1.787×10 <sup>-5</sup> | <div></div>               |     |  |  |  |  |  |
| <input type="checkbox"/> | Synthesis of PA                  | REAC:R-HSA-1... |                                                                                   | 8.291×10 <sup>-5</sup> | <div></div>               |     |  |  |  |  |  |
| <input type="checkbox"/> | Metabolism of lipids             | REAC:R-HSA-5... |                                                                                   | 2.708×10 <sup>-4</sup> | <div></div>               |     |  |  |  |  |  |
| <input type="checkbox"/> | Metabolism                       | REAC:R-HSA-1... |                                                                                   | 4.964×10 <sup>-2</sup> | <div></div>               |     |  |  |  |  |  |

**Figure S11.** g:Profiler functional annotation of GPD1L co-expressed lipid metabolism genes

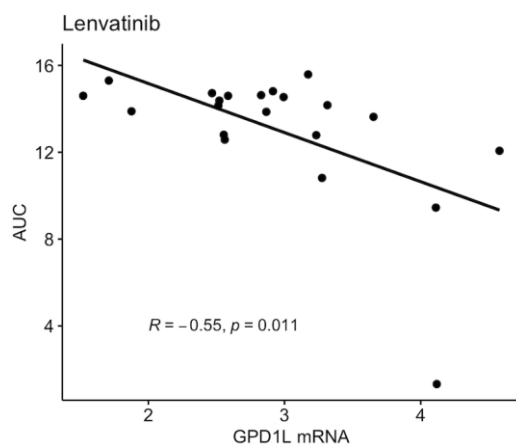

**Figure S12.** Correlation between hepatocellular cancer cell line mRNA and lenvatinib drug response (area under the curve, AUC). Data source: Rees et al (PMID: 26656090)

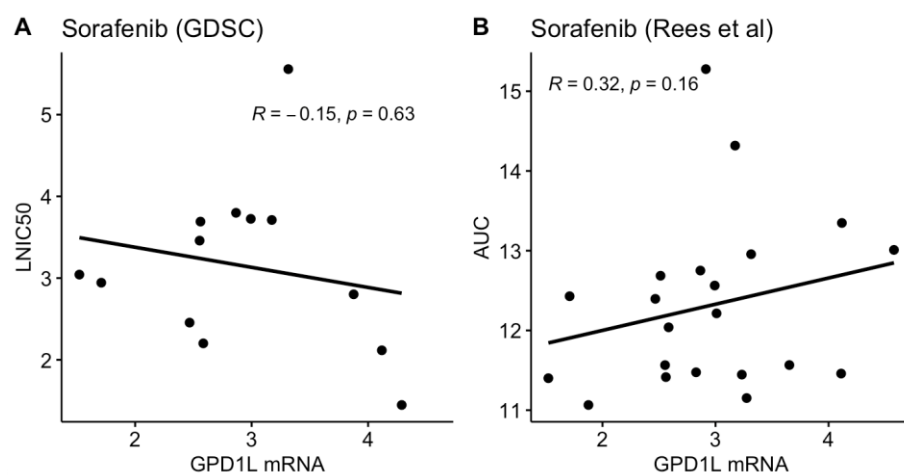

**Figure S13.** Correlation between hepatocellular cancer cell line mRNA and sorafenib drug response (area under the curve, AUC). Data sources: GDSC and Rees et al (PMID: 26656090)



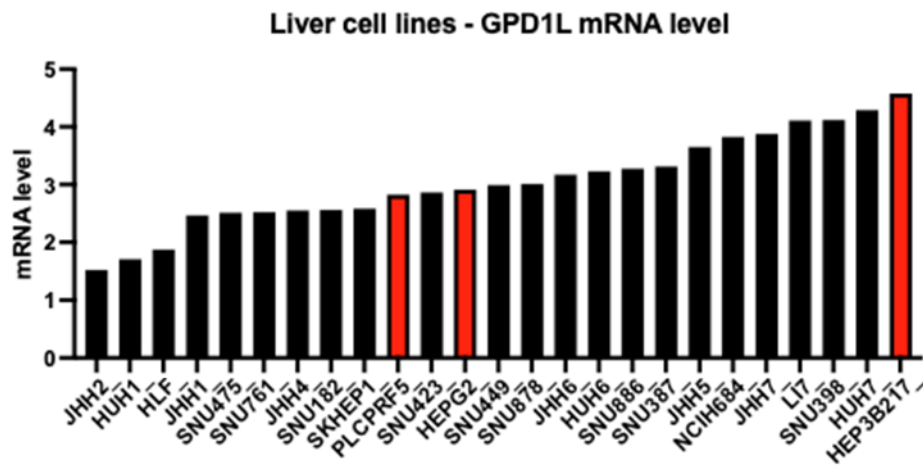

**Figure S14.** GPD1L mRNA levels in liver cell lines
