# Supplementary material for: Prognostic and Predictive Utility of GPD1L in Human Hepatocellular Carcinoma
Source: Int J Mol Sci. 2023 Aug 23;24(17):13113. doi: 10.3390/ijms241713113 (PMC10487989; doi:10.3390/ijms241713113)
Supplement: Supplementary file 1 [file ijms-24-13113-s001.zip › Table S1.csv]

sample	patient	OS	OS.time	gene expression RNAseq - IlluminaHiSeq: GPD1L	data
TCGA-FV-A4ZQ-01	TCGA-FV-A4ZQ	0	12	high	10.85
TCGA-DD-A4NA-01	TCGA-DD-A4NA	0	1008	high	10.61
TCGA-DD-A1EI-01	TCGA-DD-A1EI	0	183	high	10.42
TCGA-CC-A9FV-01	TCGA-CC-A9FV	0	0	high	10.32
TCGA-BC-4072-01	TCGA-BC-4072	1	1490	high	10.09
TCGA-DD-A4NE-01	TCGA-DD-A4NE	1	660	high	9.94
TCGA-BC-A10W-01	TCGA-BC-A10W	1	91	high	9.887
TCGA-DD-A114-01	TCGA-DD-A114	1	1149	high	9.86
TCGA-G3-AAV7-01	TCGA-G3-AAV7	0	361	high	9.73
TCGA-QA-A7B7-01	TCGA-QA-A7B7	0	94	high	9.728
TCGA-RC-A6M3-01	TCGA-RC-A6M3	0	0	high	9.714
TCGA-CC-5258-01	TCGA-CC-5258	1	129	high	9.706
TCGA-DD-AACB-01	TCGA-DD-AACB	0	2324	high	9.695
TCGA-CC-A7IK-01	TCGA-CC-A7IK	1	262	high	9.668
TCGA-BC-A216-01	TCGA-BC-A216	0	1351	high	9.611
TCGA-CC-A1HT-01	TCGA-CC-A1HT	1	101	high	9.561
TCGA-CC-A8HV-01	TCGA-CC-A8HV	1	279	high	9.492
TCGA-DD-AACH-01	TCGA-DD-AACH	1	195	high	9.449
TCGA-DD-AAVP-01	TCGA-DD-AAVP	0	2752	high	9.446
TCGA-2Y-A9H0-01	TCGA-2Y-A9H0	0	3675	high	9.411
TCGA-ZP-A9D2-01	TCGA-ZP-A9D2	1	765	high	9.396
TCGA-BC-A10R-01	TCGA-BC-A10R	1	308	high	9.386
TCGA-BD-A2L6-01	TCGA-BD-A2L6	0	1363	high	9.353
TCGA-DD-A1EC-01	TCGA-DD-A1EC	0	602	high	9.32
TCGA-DD-A4NH-01	TCGA-DD-A4NH	0	917	high	9.312
TCGA-DD-AACZ-01	TCGA-DD-AACZ	1	171	high	9.304
TCGA-DD-AAD5-01	TCGA-DD-AAD5	0	1345	high	9.285
TCGA-CC-A7II-01	TCGA-CC-A7II	0	399	high	9.237
TCGA-2Y-A9HB-01	TCGA-2Y-A9HB	0	260	high	9.231
TCGA-FV-A3R3-01	TCGA-FV-A3R3	1	366	high	9.226
TCGA-DD-A39Y-01	TCGA-DD-A39Y	1	171	high	9.186
TCGA-FV-A3R2-01	TCGA-FV-A3R2	1	194	high	9.184
TCGA-YA-A8S7-01	TCGA-YA-A8S7	1	412	high	9.178
TCGA-MI-A75I-01	TCGA-MI-A75I	0	630	high	9.15
TCGA-DD-AACY-01	TCGA-DD-AACY	0	1450	high	9.099
TCGA-5R-AA1D-01	TCGA-5R-AA1D	0	449	high	9.041
TCGA-ED-A66Y-01	TCGA-ED-A66Y	1	296	high	9.035
TCGA-ZP-A9CZ-01	TCGA-ZP-A9CZ	0	706	high	9.029
TCGA-DD-A4NQ-01	TCGA-DD-A4NQ	1	373	high	9.021
TCGA-BD-A3EP-01	TCGA-BD-A3EP	0	409	high	8.979
TCGA-G3-A5SJ-01	TCGA-G3-A5SJ	0	698	high	8.977
TCGA-MR-A8JO-01	TCGA-MR-A8JO	0	330	high	8.969
TCGA-DD-A3A6-01	TCGA-DD-A3A6	1	3258	high	8.961
TCGA-GJ-A3OU-01	TCGA-GJ-A3OU	0	879	high	8.952
TCGA-DD-AACL-01	TCGA-DD-AACL	1	107	high	8.951
TCGA-DD-AAEG-01	TCGA-DD-AAEG	0	719	high	8.951
TCGA-DD-AAVV-01	TCGA-DD-AAVV	0	2455	high	8.913
TCGA-CC-A3MC-01	TCGA-CC-A3MC	0	363	high	8.899
TCGA-DD-AACU-01	TCGA-DD-AACU	0	1567	high	8.868
TCGA-RC-A6M5-01	TCGA-RC-A6M5	0	15	high	8.858
TCGA-RC-A7SK-01	TCGA-RC-A7SK	0	472	high	8.837
TCGA-2Y-A9H7-01	TCGA-2Y-A9H7	0	1168	high	8.835
TCGA-WX-AA47-01	TCGA-WX-AA47	1	556	high	8.809
TCGA-DD-AAED-01	TCGA-DD-AAED	0	763	high	8.806
TCGA-CC-A3M9-01	TCGA-CC-A3M9	1	300	high	8.793
TCGA-DD-AACI-01	TCGA-DD-AACI	0	1618	high	8.79
TCGA-DD-AAVW-01	TCGA-DD-AAVW	0	2317	high	8.784
TCGA-ED-A97K-01	TCGA-ED-A97K	0	6	high	8.784
TCGA-CC-A7IL-01	TCGA-CC-A7IL	1	278	high	8.78
TCGA-CC-5264-01	TCGA-CC-5264	1	102	high	8.78
TCGA-G3-A7M9-01	TCGA-G3-A7M9	1	56	high	8.771
TCGA-RC-A6M6-01	TCGA-RC-A6M6	0	9	high	8.744
TCGA-BC-A10T-01	TCGA-BC-A10T	1	837	high	8.736
TCGA-CC-A7IG-01	TCGA-CC-A7IG	1	299	high	8.723
TCGA-DD-AAD1-01	TCGA-DD-AAD1	0	564	high	8.703
TCGA-WX-AA44-01	TCGA-WX-AA44	0	615	high	8.699
TCGA-DD-AADK-01	TCGA-DD-AADK	0	1049	high	8.69
TCGA-ED-A7XP-01	TCGA-ED-A7XP	0	400	high	8.678
TCGA-DD-AAD2-01	TCGA-DD-AAD2	0	658	high	8.677
TCGA-BW-A5NQ-01	TCGA-BW-A5NQ	0	0	high	8.675
TCGA-EP-A2KA-01	TCGA-EP-A2KA	1	627	high	8.659
TCGA-RC-A7S9-01	TCGA-RC-A7S9	0	640	high	8.634
TCGA-CC-A7IJ-01	TCGA-CC-A7IJ	0	382	high	8.634
TCGA-DD-AADN-01	TCGA-DD-AADN	0	898	high	8.624
TCGA-BC-A8YO-01	TCGA-BC-A8YO	0	562	high	8.608
TCGA-CC-5261-01	TCGA-CC-5261	1	97	high	8.596
TCGA-BC-A5W4-01	TCGA-BC-A5W4	1	547	high	8.566
TCGA-DD-AADP-01	TCGA-DD-AADP	0	458	high	8.56
TCGA-DD-A73F-01	TCGA-DD-A73F	0	1085	high	8.545
TCGA-CC-A3MA-01	TCGA-CC-A3MA	1	303	high	8.545
TCGA-BC-A3KG-01	TCGA-BC-A3KG	0	680	high	8.538
TCGA-DD-AACD-01	TCGA-DD-AACD	1	381	high	8.528
TCGA-2Y-A9GU-01	TCGA-2Y-A9GU	0	1939	high	8.527
TCGA-UB-A7MA-01	TCGA-UB-A7MA	0	848	high	8.52
TCGA-K7-AAU7-01	TCGA-K7-AAU7	0	359	high	8.506
TCGA-HP-A5N0-01	TCGA-HP-A5N0	1	1147	high	8.505
TCGA-DD-A1EL-01	TCGA-DD-A1EL	1	415	high	8.504
TCGA-DD-AADC-01	TCGA-DD-AADC	1	425	high	8.501
TCGA-CC-A7IH-01	TCGA-CC-A7IH	0	365	high	8.482
TCGA-FV-A496-01	TCGA-FV-A496	0	10	high	8.469
TCGA-DD-A4NB-01	TCGA-DD-A4NB	0	989	high	8.463
TCGA-ZP-A9D1-01	TCGA-ZP-A9D1	0	21	high	8.46
TCGA-DD-A4ND-01	TCGA-DD-A4ND	0	2746	high	8.438
TCGA-G3-AAV1-01	TCGA-G3-AAV1	1	359	high	8.412
TCGA-BC-A217-01	TCGA-BC-A217	1	1397	high	8.41
TCGA-ED-A8O6-01	TCGA-ED-A8O6	1	56	high	8.405
TCGA-DD-A119-01	TCGA-DD-A119	1	223	high	8.398
TCGA-DD-AAD6-01	TCGA-DD-AAD6	0	672	high	8.385
TCGA-ED-A5KG-01	TCGA-ED-A5KG	0	854	high	8.385
TCGA-DD-A4NJ-01	TCGA-DD-A4NJ	0	928	high	8.381
TCGA-DD-AADQ-01	TCGA-DD-AADQ	0	436	high	8.37
TCGA-DD-A3A3-01	TCGA-DD-A3A3	1	535	high	8.353
TCGA-DD-AACG-01	TCGA-DD-AACG	1	469	high	8.352
TCGA-DD-A1EH-01	TCGA-DD-A1EH	0	1495	high	8.344
TCGA-PD-A5DF-01	TCGA-PD-A5DF	1	639	high	8.315
TCGA-K7-A5RG-01	TCGA-K7-A5RG	0	519	high	8.307
TCGA-CC-5263-01	TCGA-CC-5263	1	129	high	8.306
TCGA-DD-A4NR-01	TCGA-DD-A4NR	1	9	high	8.287
TCGA-UB-A7MD-01	TCGA-UB-A7MD	1	52	high	8.258
TCGA-BC-A112-01	TCGA-BC-A112	1	153	high	8.248
TCGA-DD-A39X-01	TCGA-DD-A39X	1	1694	high	8.239
TCGA-DD-AACP-01	TCGA-DD-AACP	0	415	high	8.226
TCGA-BC-4073-01	TCGA-BC-4073	0	849	high	8.192
TCGA-DD-AAVZ-01	TCGA-DD-AAVZ	0	1900	high	8.191
TCGA-BC-A10U-01	TCGA-BC-A10U	1	837	high	8.182
TCGA-BC-A10Z-01	TCGA-BC-A10Z	1	34	high	8.169
TCGA-G3-A25X-01	TCGA-G3-A25X	0	1779	high	8.164
TCGA-DD-AAVR-01	TCGA-DD-AAVR	0	2513	high	8.154
TCGA-T1-A6J8-01	TCGA-T1-A6J8	0	23	high	8.15
TCGA-BC-A69H-01	TCGA-BC-A69H	0	444	high	8.132
TCGA-DD-A3A7-01	TCGA-DD-A3A7	1	419	high	8.096
TCGA-DD-AADA-01	TCGA-DD-AADA	0	1233	high	8.091
TCGA-CC-A7IE-01	TCGA-CC-A7IE	1	217	high	8.088
TCGA-DD-AACN-01	TCGA-DD-AACN	0	1302	high	8.066
TCGA-CC-5260-01	TCGA-CC-5260	1	87	high	8.042
TCGA-DD-A4NS-01	TCGA-DD-A4NS	1	2456	high	8.04
TCGA-CC-A8HS-01	TCGA-CC-A8HS	1	300	high	8.032
TCGA-LG-A9QC-01	TCGA-LG-A9QC	0	425	high	8.017
TCGA-CC-A3MB-01	TCGA-CC-A3MB	1	315	high	8.001
TCGA-DD-A11D-01	TCGA-DD-A11D	1	1560	high	7.999
TCGA-O8-A75V-01	TCGA-O8-A75V	0	538	high	7.987
TCGA-2Y-A9H6-01	TCGA-2Y-A9H6	0	357	high	7.986
TCGA-2Y-A9GZ-01	TCGA-2Y-A9GZ	1	848	high	7.982
TCGA-DD-A113-01	TCGA-DD-A113	0	2425	high	7.98
TCGA-CC-A8HU-01	TCGA-CC-A8HU	1	344	high	7.978
TCGA-DD-AAD3-01	TCGA-DD-AAD3	0	1295	high	7.975
TCGA-ED-A627-01	TCGA-ED-A627	0	423	high	7.962
TCGA-WQ-A9G7-01	TCGA-WQ-A9G7	0	30	high	7.959
TCGA-FV-A23B-01	TCGA-FV-A23B	1	1852	high	7.958
TCGA-XR-A8TC-01	TCGA-XR-A8TC	0	1339	high	7.958
TCGA-DD-AAVU-01	TCGA-DD-AAVU	0	2202	high	7.955
TCGA-CC-A9FU-01	TCGA-CC-A9FU	0	0	high	7.939
TCGA-G3-A7M6-01	TCGA-G3-A7M6	0	632	high	7.936
TCGA-DD-AAE0-01	TCGA-DD-AAE0	0	555	high	7.924
TCGA-ED-A8O5-01	TCGA-ED-A8O5	0	406	high	7.897
TCGA-DD-AAW0-01	TCGA-DD-AAW0	0	2015	high	7.849
TCGA-GJ-A9DB-01	TCGA-GJ-A9DB	1	67	high	7.844
TCGA-2Y-A9GX-01	TCGA-2Y-A9GX	0	2442	high	7.842
TCGA-DD-A73B-01	TCGA-DD-A73B	1	283	high	7.841
TCGA-ED-A4XI-01	TCGA-ED-A4XI	0	819	high	7.841
TCGA-CC-A123-01	TCGA-CC-A123	0	219	high	7.841
TCGA-UB-AA0V-01	TCGA-UB-AA0V	0	314	high	7.839
TCGA-CC-5259-01	TCGA-CC-5259	0	250	high	7.833
TCGA-DD-A118-01	TCGA-DD-A118	0	3437	high	7.821
TCGA-XR-A8TE-01	TCGA-XR-A8TE	0	925	high	7.788
TCGA-UB-A7MC-01	TCGA-UB-A7MC	0	500	high	7.767
TCGA-DD-AAE1-01	TCGA-DD-AAE1	0	552	high	7.751
TCGA-XR-A8TD-01	TCGA-XR-A8TD	0	1030	high	7.741
TCGA-4R-AA8I-01	TCGA-4R-AA8I	1	262	high	7.722
TCGA-BW-A5NP-01	TCGA-BW-A5NP	0	0	high	7.72
TCGA-BC-A10Q-01	TCGA-BC-A10Q	1	1135	high	7.713
TCGA-DD-A3A1-01	TCGA-DD-A3A1	1	233	high	7.712
TCGA-BC-A110-01	TCGA-BC-A110	1	2116	high	7.707
TCGA-G3-AAV6-01	TCGA-G3-AAV6	1	65	high	7.697
TCGA-ED-A7PZ-01	TCGA-ED-A7PZ	0	6	high	7.696
TCGA-2Y-A9GS-01	TCGA-2Y-A9GS	1	724	high	7.673
TCGA-DD-A3A9-01	TCGA-DD-A3A9	1	931	high	7.653
TCGA-CC-A9FS-01	TCGA-CC-A9FS	0	211	high	7.646
TCGA-CC-A9FW-01	TCGA-CC-A9FW	0	248	high	7.644
TCGA-DD-AADR-01	TCGA-DD-AADR	0	2028	high	7.641
TCGA-K7-A5RF-01	TCGA-K7-A5RF	0	631	high	7.64
TCGA-2Y-A9H8-01	TCGA-2Y-A9H8	1	633	high	7.609
TCGA-ED-A7PX-01	TCGA-ED-A7PX	0	6	high	7.607
TCGA-ED-A66X-01	TCGA-ED-A66X	0	406	high	7.602
TCGA-DD-A1EK-01	TCGA-DD-A1EK	1	558	high	7.59
TCGA-ZP-A9CV-01	TCGA-ZP-A9CV	1	1088	high	7.586
TCGA-XR-A8TF-01	TCGA-XR-A8TF	1	693	high	7.583
TCGA-CC-A5UE-01	TCGA-CC-A5UE	1	272	high	7.577
TCGA-DD-AADY-01	TCGA-DD-AADY	0	555	high	7.573
TCGA-DD-A4NG-01	TCGA-DD-A4NG	1	802	high	7.572
TCGA-DD-A4NK-01	TCGA-DD-A4NK	1	1210	high	7.571
TCGA-DD-A11B-01	TCGA-DD-A11B	1	14	high	7.564
TCGA-5C-A9VG-01	TCGA-5C-A9VG	0	328	high	7.552
TCGA-BC-A10X-01	TCGA-BC-A10X	1	770	high	7.543
TCGA-CC-A5UD-01	TCGA-CC-A5UD	1	304	low	7.542
TCGA-G3-A3CH-01	TCGA-G3-A3CH	0	780	low	7.535
TCGA-G3-A25T-01	TCGA-G3-A25T	0	1553	low	7.517
TCGA-DD-AACJ-01	TCGA-DD-AACJ	0	2102	low	7.508
TCGA-DD-AA3A-01	TCGA-DD-AA3A	1	410	low	7.487
TCGA-2Y-A9H3-01	TCGA-2Y-A9H3	0	1516	low	7.469
TCGA-BC-A3KF-01	TCGA-BC-A3KF	0	8	low	7.467
TCGA-5R-AAAM-01	TCGA-5R-AAAM	1	46	low	7.466
TCGA-DD-AAEK-01	TCGA-DD-AAEK	0	1067	low	7.458
TCGA-DD-A4NF-01	TCGA-DD-A4NF	0	942	low	7.453
TCGA-KR-A7K2-01	TCGA-KR-A7K2	0	829	low	7.444
TCGA-DD-A39Z-01	TCGA-DD-A39Z	1	601	low	7.426
TCGA-XR-A8TG-01	TCGA-XR-A8TG	0	898	low	7.416
TCGA-G3-A25Y-01	TCGA-G3-A25Y	1	452	low	7.386
TCGA-WJ-A86L-01	TCGA-WJ-A86L	0	345	low	7.341
TCGA-2Y-A9HA-01	TCGA-2Y-A9HA	1	36	low	7.337
TCGA-DD-AAEB-01	TCGA-DD-AAEB	0	478	low	7.337
TCGA-DD-A1EG-01	TCGA-DD-A1EG	1	1372	low	7.334
TCGA-3K-AAZ8-01	TCGA-3K-AAZ8	0	396	low	7.327
TCGA-DD-AAC8-01	TCGA-DD-AAC8	1	16	low	7.312
TCGA-DD-AACC-01	TCGA-DD-AACC	1	1685	low	7.311
TCGA-CC-A5UC-01	TCGA-CC-A5UC	1	347	low	7.299
TCGA-DD-AACQ-01	TCGA-DD-AACQ	1	432	low	7.295
TCGA-DD-A73E-01	TCGA-DD-A73E	0	44	low	7.284
TCGA-DD-A115-01	TCGA-DD-A115	1	2542	low	7.28
TCGA-DD-AAVX-01	TCGA-DD-AAVX	0	1718	low	7.273
TCGA-ZP-A9D0-01	TCGA-ZP-A9D0	0	1091	low	7.256
TCGA-DD-A1ED-01	TCGA-DD-A1ED	0	2301	low	7.216
TCGA-5C-AAPD-01	TCGA-5C-AAPD	0	20	low	7.215
TCGA-HP-A5MZ-01	TCGA-HP-A5MZ	1	91	low	7.205
TCGA-FV-A4ZP-01	TCGA-FV-A4ZP	1	2486	low	7.199
TCGA-UB-A7MF-01	TCGA-UB-A7MF	1	214	low	7.192
TCGA-DD-A4NO-01	TCGA-DD-A4NO	0	2245	low	7.188
TCGA-DD-A73C-01	TCGA-DD-A73C	0	701	low	7.145
TCGA-DD-AAE4-01	TCGA-DD-AAE4	0	608	low	7.136
TCGA-2Y-A9H1-01	TCGA-2Y-A9H1	1	1229	low	7.127
TCGA-UB-A7ME-01	TCGA-UB-A7ME	0	486	low	7.123
TCGA-MI-A75C-01	TCGA-MI-A75C	0	291	low	7.123
TCGA-RC-A7SF-01	TCGA-RC-A7SF	0	579	low	7.12
TCGA-5C-A9VH-01	TCGA-5C-A9VH	0	322	low	7.119
TCGA-ZS-A9CD-01	TCGA-ZS-A9CD	1	1386	low	7.114
TCGA-CC-A8HT-01	TCGA-CC-A8HT	1	140	low	7.108
TCGA-RG-A7D4-01	TCGA-RG-A7D4	0	1098	low	7.095
TCGA-NI-A8LF-01	TCGA-NI-A8LF	0	799	low	7.093
TCGA-2Y-A9H5-01	TCGA-2Y-A9H5	1	555	low	7.052
TCGA-2Y-A9GW-01	TCGA-2Y-A9GW	1	1271	low	7.045
TCGA-CC-A7IF-01	TCGA-CC-A7IF	1	649	low	7.034
TCGA-DD-A73G-01	TCGA-DD-A73G	0	3478	low	7.031
TCGA-G3-A7M7-01	TCGA-G3-A7M7	0	361	low	7.03
TCGA-EP-A3JL-01	TCGA-EP-A3JL	0	303	low	7.03
TCGA-DD-AAE2-01	TCGA-DD-AAE2	0	638	low	7.025
TCGA-FV-A495-01	TCGA-FV-A495	0	1	low	7.006
TCGA-DD-AACX-01	TCGA-DD-AACX	0	170	low	7.003
TCGA-2Y-A9GT-01	TCGA-2Y-A9GT	1	1624	low	6.994
TCGA-WX-AA46-01	TCGA-WX-AA46	0	756	low	6.976
TCGA-DD-AAEE-01	TCGA-DD-AAEE	0	810	low	6.974
TCGA-DD-AAE6-01	TCGA-DD-AAE6	0	141	low	6.948
TCGA-CC-5262-01	TCGA-CC-5262	1	103	low	6.928
TCGA-K7-A6G5-01	TCGA-K7-A6G5	0	512	low	6.914
TCGA-DD-AAE3-01	TCGA-DD-AAE3	0	566	low	6.91
TCGA-FV-A2QR-01	TCGA-FV-A2QR	1	581	low	6.902
TCGA-G3-A25V-01	TCGA-G3-A25V	0	860	low	6.871
TCGA-DD-A39V-01	TCGA-DD-A39V	1	643	low	6.869
TCGA-DD-A11C-01	TCGA-DD-A11C	0	662	low	6.865
TCGA-DD-AADW-01	TCGA-DD-AADW	0	587	low	6.864
TCGA-DD-AAE7-01	TCGA-DD-AAE7	0	644	low	6.853
TCGA-DD-A1EF-01	TCGA-DD-A1EF	1	394	low	6.835
TCGA-DD-AAEH-01	TCGA-DD-AAEH	0	784	low	6.832
TCGA-BW-A5NO-01	TCGA-BW-A5NO	0	20	low	6.804
TCGA-DD-AADJ-01	TCGA-DD-AADJ	0	1066	low	6.796
TCGA-DD-A4NV-01	TCGA-DD-A4NV	0	2398	low	6.778
TCGA-DD-AADV-01	TCGA-DD-AADV	0	574	low	6.761
TCGA-DD-AAEA-01	TCGA-DD-AAEA	0	575	low	6.758
TCGA-UB-AA0U-01	TCGA-UB-AA0U	0	327	low	6.72
TCGA-2Y-A9GY-01	TCGA-2Y-A9GY	1	757	low	6.713
TCGA-GJ-A6C0-01	TCGA-GJ-A6C0	1	31	low	6.705
TCGA-2Y-A9GV-01	TCGA-2Y-A9GV	1	2532	low	6.703
TCGA-ED-A7PY-01	TCGA-ED-A7PY	0	390	low	6.699
TCGA-DD-AADO-01	TCGA-DD-AADO	0	453	low	6.693
TCGA-G3-AAUZ-01	TCGA-G3-AAUZ	0	480	low	6.688
TCGA-DD-AACT-01	TCGA-DD-AACT	0	1562	low	6.687
TCGA-DD-A4NN-01	TCGA-DD-A4NN	1	899	low	6.671
TCGA-DD-AAVQ-01	TCGA-DD-AAVQ	0	2728	low	6.661
TCGA-DD-A4NI-01	TCGA-DD-A4NI	0	816	low	6.656
TCGA-DD-AADI-01	TCGA-DD-AADI	0	1085	low	6.639
TCGA-ES-A2HT-01	TCGA-ES-A2HT	1	438	low	6.639
TCGA-FV-A2QQ-01	TCGA-FV-A2QQ	0	729	low	6.634
TCGA-MI-A75G-01	TCGA-MI-A75G	0	698	low	6.622
TCGA-EP-A3RK-01	TCGA-EP-A3RK	0	363	low	6.62
TCGA-G3-AAV5-01	TCGA-G3-AAV5	0	354	low	6.612
TCGA-DD-AADB-01	TCGA-DD-AADB	0	1242	low	6.599
TCGA-WQ-AB4B-01	TCGA-WQ-AB4B	0	395	low	6.589
TCGA-G3-A5SK-01	TCGA-G3-A5SK	0	744	low	6.581
TCGA-ED-A7XO-01	TCGA-ED-A7XO	0	427	low	6.571
TCGA-BC-A10S-01	TCGA-BC-A10S	1	1423	low	6.56
TCGA-NI-A4U2-01	TCGA-NI-A4U2	1	1791	low	6.558
TCGA-G3-A5SM-01	TCGA-G3-A5SM	0	520	low	6.533
TCGA-G3-A3CI-01	TCGA-G3-A3CI	0	180	low	6.527
TCGA-DD-AACW-01	TCGA-DD-AACW	0	1424	low	6.522
TCGA-ZP-A9CY-01	TCGA-ZP-A9CY	0	782	low	6.52
TCGA-UB-A7MB-01	TCGA-UB-A7MB	0	601	low	6.513
TCGA-DD-AAC9-01	TCGA-DD-AAC9	0	347	low	6.504
TCGA-LG-A9QD-01	TCGA-LG-A9QD	0	366	low	6.489
TCGA-EP-A2KB-01	TCGA-EP-A2KB	1	596	low	6.477
TCGA-DD-AAW2-01	TCGA-DD-AAW2	0	1855	low	6.467
TCGA-BD-A3ER-01	TCGA-BD-A3ER	0	1115	low	6.466
TCGA-G3-AAV2-01	TCGA-G3-AAV2	0	372	low	6.464
TCGA-G3-A7M5-01	TCGA-G3-A7M5	0	447	low	6.438
TCGA-MI-A75E-01	TCGA-MI-A75E	0	507	low	6.429
TCGA-KR-A7K7-01	TCGA-KR-A7K7	0	951	low	6.429
TCGA-G3-A6UC-01	TCGA-G3-A6UC	0	671	low	6.423
TCGA-DD-AAD0-01	TCGA-DD-AAD0	0	137	low	6.396
TCGA-2Y-A9H2-01	TCGA-2Y-A9H2	0	1731	low	6.38
TCGA-ED-A82E-01	TCGA-ED-A82E	0	408	low	6.376
TCGA-RC-A7SH-01	TCGA-RC-A7SH	0	468	low	6.368
TCGA-G3-A25S-01	TCGA-G3-A25S	1	416	low	6.362
TCGA-DD-A4NL-01	TCGA-DD-A4NL	0	1711	low	6.351
TCGA-RC-A7SB-01	TCGA-RC-A7SB	0	588	low	6.345
TCGA-DD-A1EJ-01	TCGA-DD-A1EJ	1	1005	low	6.328
TCGA-DD-AAVS-01	TCGA-DD-AAVS	0	1823	low	6.322
TCGA-ZS-A9CF-01	TCGA-ZS-A9CF	0	2412	low	6.314
TCGA-DD-AADG-01	TCGA-DD-AADG	0	1145	low	6.3
TCGA-RC-A6M4-01	TCGA-RC-A6M4	0	22	low	6.29
TCGA-DD-A116-01	TCGA-DD-A116	1	1622	low	6.272
TCGA-G3-A3CG-01	TCGA-G3-A3CG	0	673	low	6.221
TCGA-DD-A1EA-01	TCGA-DD-A1EA	0	2415	low	6.217
TCGA-ZP-A9D4-01	TCGA-ZP-A9D4	0	395	low	6.209
TCGA-DD-AACV-01	TCGA-DD-AACV	0	1531	low	6.201
TCGA-DD-AAVY-01	TCGA-DD-AAVY	0	1970	low	6.178
TCGA-KR-A7K0-01	TCGA-KR-A7K0	1	65	low	6.141
TCGA-KR-A7K8-01	TCGA-KR-A7K8	0	906	low	6.132
TCGA-FV-A3I1-01	TCGA-FV-A3I1	1	247	low	6.092
TCGA-G3-A7M8-01	TCGA-G3-A7M8	0	430	low	6.089
TCGA-DD-AACA-01	TCGA-DD-AACA	0	2301	low	6.089
TCGA-DD-AACF-01	TCGA-DD-AACF	1	365	low	6.073
TCGA-G3-A25U-01	TCGA-G3-A25U	0	1636	low	6.07
TCGA-DD-A3A5-01	TCGA-DD-A3A5	1	3125	low	6.039
TCGA-DD-A4NP-01	TCGA-DD-A4NP	0	3308	low	6.002
TCGA-DD-AADM-01	TCGA-DD-AADM	1	12	low	5.985
TCGA-DD-AADD-01	TCGA-DD-AADD	0	1231	low	5.965
TCGA-DD-A1EB-01	TCGA-DD-A1EB	0	2017	low	5.955
TCGA-G3-AAV3-01	TCGA-G3-AAV3	0	412	low	5.944
TCGA-MI-A75H-01	TCGA-MI-A75H	0	747	low	5.933
TCGA-BC-A69I-01	TCGA-BC-A69I	0	387	low	5.929
TCGA-ED-A459-01	TCGA-ED-A459	0	910	low	5.899
TCGA-DD-AAD8-01	TCGA-DD-AAD8	0	1219	low	5.872
TCGA-DD-A73A-01	TCGA-DD-A73A	0	728	low	5.871
TCGA-G3-AAV0-01	TCGA-G3-AAV0	0	476	low	5.863
TCGA-DD-AACK-01	TCGA-DD-AACK	0	9	low	5.822
TCGA-ZS-A9CE-01	TCGA-ZS-A9CE	0	1241	low	5.814
TCGA-EP-A26S-01	TCGA-EP-A26S	0	608	low	5.786
TCGA-BC-A10Y-01	TCGA-BC-A10Y	1	711	low	5.782
TCGA-DD-AACO-01	TCGA-DD-AACO	0	1876	low	5.772
TCGA-FV-A3I0-01	TCGA-FV-A3I0	0	848	low	5.766
TCGA-DD-A11A-01	TCGA-DD-A11A	0	79	low	5.734
TCGA-EP-A2KC-01	TCGA-EP-A2KC	1	19	low	5.726
TCGA-5R-AA1C-01	TCGA-5R-AA1C	0	520	low	5.722
TCGA-G3-A5SL-01	TCGA-G3-A5SL	0	621	low	5.719
TCGA-ZS-A9CG-01	TCGA-ZS-A9CG	0	341	low	5.654
TCGA-DD-AAEI-01	TCGA-DD-AAEI	0	1531	low	5.641
TCGA-DD-AADS-01	TCGA-DD-AADS	0	474	low	5.624
TCGA-DD-A3A2-01	TCGA-DD-A3A2	1	2131	low	5.572
TCGA-G3-A5SI-01	TCGA-G3-A5SI	1	768	low	5.539
TCGA-DD-A39W-01	TCGA-DD-A39W	1	827	low	5.515
TCGA-DD-A3A8-01	TCGA-DD-A3A8	1	11	low	5.502
TCGA-MR-A520-01	TCGA-MR-A520	0	229	low	5.485
TCGA-DD-AACS-01	TCGA-DD-AACS	0	1804	low	5.484
TCGA-EP-A12J-01	TCGA-EP-A12J	0	570	low	5.482
TCGA-2Y-A9H9-01	TCGA-2Y-A9H9	0	697	low	5.469
TCGA-G3-A3CJ-01	TCGA-G3-A3CJ	0	594	low	5.374
TCGA-2Y-A9H4-01	TCGA-2Y-A9H4	0	1452	low	5.335
TCGA-G3-A25Z-01	TCGA-G3-A25Z	0	655	low	5.278
TCGA-G3-AAV4-01	TCGA-G3-AAV4	1	27	low	5.273
TCGA-DD-AACE-01	TCGA-DD-AACE	0	2184	low	5.273
TCGA-DD-AAW3-01	TCGA-DD-AAW3	0	1633	low	5.273
TCGA-DD-AAW1-01	TCGA-DD-AAW1	0	1989	low	5.185
TCGA-DD-A1EE-01	TCGA-DD-A1EE	1	349	low	5.134
TCGA-G3-A3CK-01	TCGA-G3-A3CK	0	585	low	5.123
TCGA-DD-AADL-01	TCGA-DD-AADL	0	636	low	4.991
TCGA-ES-A2HS-01	TCGA-ES-A2HS	1	688	low	4.959
TCGA-DD-A3A4-01	TCGA-DD-A3A4	1	612	low	4.912
TCGA-DD-AADU-01	TCGA-DD-AADU	0	554	low	4.736
TCGA-LG-A6GG-01	TCGA-LG-A6GG	0	387	low	4.291
TCGA-DD-A73D-01	TCGA-DD-A73D	0	693	low	4.224
TCGA-DD-AAE9-01	TCGA-DD-AAE9	0	722	low	4.169
TCGA-DD-AADF-01	TCGA-DD-AADF	1	115	low	3.489
