# Supplementary material for: Prognostic and Predictive Utility of GPD1L in Human Hepatocellular Carcinoma
Source: Int J Mol Sci. 2023 Aug 23;24(17):13113. doi: 10.3390/ijms241713113 (PMC10487989; doi:10.3390/ijms241713113)
Supplement: Supplementary file 1 [file ijms-24-13113-s001.zip › Table S5.csv]

Correlated Gene	Cytoband	Spearman's Correlation	p-Value	q-Value
OSBPL10	3p23	0.57818454	1.69E-33	3.37E-29
PKM	15q23	0.560739666	3.36E-31	3.35E-27
CNOT6	5q35.3	0.52349298	1.01E-26	6.73E-23
RNF145	5q33.3	0.515588855	7.70E-26	3.84E-22
PNMA1	14q24.3	0.508614521	4.42E-25	1.76E-21
ZNF860	3p24.1	0.502514658	1.97E-24	6.55E-21
ZNF532	18q21.32	0.495800122	9.86E-24	1.97E-20
IMPDH1	7q32.1	0.493407774	1.74E-23	3.15E-20
FHDC1	4q31.3	0.492304499	2.25E-23	3.52E-20
SLC1A5	19q13.32	0.485094278	1.20E-22	1.49E-19
ZNF239	10q11.22-q11.23	0.479291395	4.47E-22	4.40E-19
DNAJC18	5q31.2	0.474381906	1.34E-21	1.07E-18
LPCAT1	5p15.33	0.47341569	1.65E-21	1.27E-18
SLC7A1	13q12.3	0.472485642	2.03E-21	1.45E-18
FAM117B	2q33.2	0.47232029	2.10E-21	1.45E-18
SLC4A11	20p13	0.472062092	2.23E-21	1.48E-18
EPHB3	3q27.1	0.471479143	2.53E-21	1.63E-18
DDHD1	14q22.1	0.471201938	2.69E-21	1.68E-18
MTMR2	11q21	0.469942927	3.54E-21	2.14E-18
PHF21A	11p11.2	0.468599196	4.74E-21	2.70E-18
MACIR	5q21.1	0.468237152	5.13E-21	2.84E-18
BICD1	12p11.21	0.466026431	8.27E-21	4.34E-18
RNF24	20p13	0.464523132	1.14E-20	5.84E-18
GLS	2q32.2	0.463970401	1.29E-20	6.18E-18
TMEM51	1p36.21	0.461426143	2.21E-20	1.02E-17
LRP8	1p32.3	0.459052084	3.65E-20	1.58E-17
MARCHF3	5q23.2	0.458477817	4.11E-20	1.71E-17
RGS2	1q31.2	0.458295975	4.27E-20	1.74E-17
UAP1L1	9q34.3	0.457439229	5.12E-20	2.04E-17
KIF3C	2p23.3	0.457264845	5.31E-20	2.07E-17
CLSTN1	1p36.22	0.456466228	6.27E-20	2.40E-17
ABCC1	16p13.11	0.455799556	7.20E-20	2.66E-17
PIP4K2A	10p12.2	0.454331952	9.77E-20	3.42E-17
SLC6A6	3p25.1	0.453998616	1.05E-19	3.60E-17
DYRK2	12q15	0.452676075	1.38E-19	4.65E-17
OBSCN	1q42.13	0.452387779	1.46E-19	4.85E-17
DBN1	5q35.3	0.451813929	1.64E-19	5.37E-17
CEP126	11q22.1	0.451589742	1.72E-19	5.53E-17
LAMB1	7q31.1	0.451479049	1.76E-19	5.57E-17
LRP12	8q22.3	0.450954097	1.96E-19	6.10E-17
CACNB1	17q12	0.450117413	2.32E-19	7.13E-17
CHST11	12q23.3	0.449270956	2.76E-19	8.19E-17
PLEKHG4	16q22.1	0.449216429	2.79E-19	8.19E-17
PLXNA1	3q21.3	0.447531745	3.93E-19	1.12E-16
SNPH	20p13	0.447377066	4.06E-19	1.14E-16
ELF4	Xq26.1	0.446553086	4.79E-19	1.31E-16
EFNA5	5q21.3	0.445959719	5.40E-19	1.46E-16
ZC2HC1A	8q21.13	0.445880498	5.49E-19	1.46E-16
ENO2	12p13.31	0.445039699	6.50E-19	1.65E-16
MYLIP	6p22.3	0.445015165	6.53E-19	1.65E-16
PGM2L1	11q13.4	0.443389995	9.05E-19	2.18E-16
SLC39A10	2q32.3	0.443366075	9.09E-19	2.18E-16
DUSP4	8p12	0.443240846	9.32E-19	2.19E-16
EGLN3	14q13.1	0.443233615	9.33E-19	2.19E-16
RCC2	1p36.13	0.442922813	9.93E-19	2.30E-16
C3ORF52	3q13.2	0.442796902	1.02E-18	2.33E-16
C18ORF54	18q21.2	0.441825325	1.24E-18	2.80E-16
PDP1	8q22.1	0.441674961	1.27E-18	2.85E-16
INPP4A	2q11.2	0.441346512	1.36E-18	3.01E-16
STK17B	2q32.3	0.441219454	1.39E-18	3.05E-16
TEAD2	19q13.33	0.441118373	1.42E-18	3.08E-16
EEIG2	1p13.3	0.440831591	1.50E-18	3.23E-16
LHFPL2	5q14.1	0.440671353	1.55E-18	3.30E-16
SYNGR3	16p13.3	0.440448853	1.62E-18	3.41E-16
CEP135	4q12	0.44031847	1.67E-18	3.46E-16
LIMK1	7q11.23	0.438710589	2.29E-18	4.57E-16
CSRNP2	12q13.12	0.438674681	2.30E-18	4.57E-16
B3GNT5	3q27.1	0.438657706	2.31E-18	4.57E-16
FCHO1	19p13.11	0.438436253	2.41E-18	4.68E-16
YEATS2	3q27.1	0.437917474	2.67E-18	5.13E-16
FZD7	2q33.1	0.43667055	3.41E-18	6.44E-16
ITGA3	17q21.33	0.436657176	3.42E-18	6.44E-16
DZIP1L	3q22.3	0.436375594	3.61E-18	6.73E-16
ZDHHC13	11p15.1	0.436335414	3.64E-18	6.73E-16
RASA3	13q34	0.436242564	3.71E-18	6.79E-16
RCOR2	11q13.1	0.43608891	3.82E-18	6.93E-16
RAB6B	3q22.1	0.435321003	4.44E-18	7.93E-16
ITPR3	6p21.31	0.435303513	4.45E-18	7.93E-16
TDG	12q23.3	0.434428506	5.28E-18	9.24E-16
SFXN3	10q24.31	0.434208625	5.51E-18	9.55E-16
BAK1	6p21.31	0.433452161	6.38E-18	1.09E-15
RPP25	15q24.2	0.433113351	6.81E-18	1.15E-15
ARHGEF2	1q22	0.432849276	7.16E-18	1.19E-15
RUBCN	3q29	0.432838731	7.18E-18	1.19E-15
FZD1	7q21.13	0.432316607	7.94E-18	1.31E-15
CPSF6	12q15	0.432230701	8.07E-18	1.32E-15
COL9A2	1p34.2	0.431834921	8.71E-18	1.41E-15
NCK2	2q12.2	0.430785731	1.07E-17	1.70E-15
GPD2	2q24.1	0.430485318	1.13E-17	1.79E-15
MFSD10	4p16.3	0.429638089	1.33E-17	2.07E-15
HK2	2p12	0.429043177	1.49E-17	2.28E-15
AACS	12q24.31	0.428265393	1.72E-17	2.60E-15
SEL1L3	4p15.2	0.427430767	2.02E-17	3.01E-15
NFE2L3	7p15.2	0.427225776	2.10E-17	3.08E-15
RIT1	1q22	0.427083028	2.16E-17	3.14E-15
TPM4	19p13.12-p13.11	0.426768468	2.29E-17	3.28E-15
PMAIP1	18q21.32	0.424978363	3.21E-17	4.47E-15
FHOD3	18q12.2	0.424709815	3.37E-17	4.64E-15
MICAL1	6q21	0.424572463	3.46E-17	4.73E-15
CREB3L1	11p11.2	0.424513564	3.50E-17	4.75E-15
SPRED1	15q14	0.423883929	3.94E-17	5.24E-15
ADAM12	10q26.2	0.423744423	4.04E-17	5.34E-15
LPCAT4	15q14	0.423641671	4.12E-17	5.39E-15
PFKP	10p15.2	0.423625467	4.13E-17	5.39E-15
SYT13	11p11.2	0.423445384	4.28E-17	5.50E-15
C15ORF39	15q24.2	0.423206198	4.47E-17	5.72E-15
SPINDOC	11q13.1	0.423141897	4.53E-17	5.75E-15
TMEM65	8q24.13	0.423073223	4.58E-17	5.79E-15
SOGA1	20q11.23	0.423037472	4.61E-17	5.79E-15
CCDC88C	14q32.11-q32.12	0.422910671	4.72E-17	5.89E-15
PDE7A	8q13.1	0.422817048	4.81E-17	5.93E-15
GPC2	7q22.1	0.422808866	4.82E-17	5.93E-15
HID1	17q25.1	0.42242327	5.17E-17	6.26E-15
STX6	1q25.3	0.422296211	5.30E-17	6.33E-15
ATP13A2	1p36.13	0.4219459	5.66E-17	6.60E-15
GIT1	17q11.2	0.421794921	5.82E-17	6.75E-15
PKIA	8q21.13	0.421626154	6.00E-17	6.92E-15
PLEKHB2	2q21.1	0.420611527	7.25E-17	8.21E-15
PLEKHH2	2p21	0.420302023	7.67E-17	8.60E-15
MAPK13	6p21.31	0.420231895	7.77E-17	8.66E-15
TYRO3	15q15.1	0.420203088	7.81E-17	8.66E-15
RHOF	12q24.31	0.419186213	9.43E-17	1.03E-14
PLCB3	11q13.1	0.418768406	1.02E-16	1.11E-14
RASAL1	12q24.13	0.418439267	1.08E-16	1.16E-14
MARCKS	6q21	0.418000396	1.17E-16	1.24E-14
RNF227	17p13.1	0.417017107	1.40E-16	1.46E-14
MACROH2A1	5q31.1	0.416934544	1.43E-16	1.47E-14
CDCA7	2q31.1	0.41647415	1.55E-16	1.59E-14
CNTNAP1	17q21.2	0.416320599	1.60E-16	1.62E-14
YWHAZ	8q22.3	0.415537929	1.84E-16	1.85E-14
TMEM44	3q29	0.415166784	1.97E-16	1.97E-14
TRDMT1	10p13	0.414280203	2.31E-16	2.31E-14
LRRC8B	1p22.2	0.414117393	2.38E-16	2.36E-14
ZC3HAV1L	7q34	0.413945156	2.46E-16	2.43E-14
ARHGAP18	6q22.33	0.413436832	2.69E-16	2.64E-14
ABI2	2q33.2	0.41317217	2.83E-16	2.75E-14
GRAMD1B	11q24.1	0.41309228	2.87E-16	2.76E-14
NCDN	1p34.3	0.412756014	3.05E-16	2.91E-14
TRAF5	1q32.3	0.411367629	3.91E-16	3.67E-14
IGDCC4	15q22.31	0.411351951	3.92E-16	3.67E-14
SOX4	6p22.3	0.411267577	3.98E-16	3.71E-14
UCHL1	4p13	0.411104535	4.10E-16	3.81E-14
PTPRE	10q26.2	0.410933726	4.23E-16	3.91E-14
MAPRE1	20q11.21	0.410689383	4.42E-16	4.06E-14
GPC4	Xq26.2	0.410528143	4.55E-16	4.14E-14
KCTD17	22q12.3	0.410502396	4.57E-16	4.14E-14
MEX3B	15q25.2	0.410147198	4.87E-16	4.39E-14
SLC4A7	3p24.1	0.410030684	4.97E-16	4.47E-14
MCUB	4q25	0.409785312	5.19E-16	4.65E-14
SGSM1	22q11.23	0.409759747	5.22E-16	4.65E-14
P2RX5	17p13.2	0.409707894	5.27E-16	4.67E-14
PDE4A	19p13.2	0.409438344	5.53E-16	4.88E-14
TPBG	6q14.1	0.409207764	5.76E-16	5.04E-14
PPT1	1p34.2	0.408996469	5.98E-16	5.21E-14
ZNF93	19p12	0.408678211	6.33E-16	5.49E-14
STXBP5	6q24.3	0.408656188	6.35E-16	5.49E-14
MBOAT2	2p25.1	0.407906699	7.26E-16	6.24E-14
IQGAP1	15q26.1	0.407722282	7.50E-16	6.37E-14
TRIM59	3q25.33	0.4075587	7.72E-16	6.50E-14
NPTX1	17q25.3	0.407202346	8.22E-16	6.89E-14
SLC41A1	1q32.1	0.407110909	8.36E-16	6.98E-14
SSH2	17q11.2	0.406982564	8.55E-16	7.05E-14
PELI1	2p14	0.406817439	8.80E-16	7.20E-14
FBLIM1	1p36.21	0.406527571	9.27E-16	7.54E-14
ULBP1	6q25.1	0.406301654	9.64E-16	7.79E-14
NKAIN1	1p35.2	0.406262318	9.71E-16	7.81E-14
CTHRC1	8q22.3	0.406032197	1.01E-15	8.10E-14
CARMIL1	6p22.2	0.405971754	1.02E-15	8.11E-14
ZNF354A	5q35.3	0.405971239	1.02E-15	8.11E-14
PAPLN	14q24.2	0.405741557	1.06E-15	8.39E-14
DRP2	Xq22.1	0.405500219	1.11E-15	8.69E-14
ASAP1	8q24.21-q24.22	0.405459714	1.12E-15	8.72E-14
RUNX2	6p21.1	0.405282552	1.15E-15	8.93E-14
PCNX2	1q42.2	0.405278076	1.16E-15	8.93E-14
GIPR	19q13.32	0.40421387	1.39E-15	1.06E-13
ANKRD13B	17q11.2	0.404143808	1.41E-15	1.07E-13
ATP8B2	1q21.3	0.404069476	1.43E-15	1.08E-13
RCAN3	1p36.11	0.403808937	1.50E-15	1.12E-13
SALL2	14q11.2	0.403733208	1.52E-15	1.13E-13
DYNC1H1	14q32.31	0.403515459	1.57E-15	1.17E-13
CEP55	10q23.33	0.403212216	1.66E-15	1.22E-13
BAZ2A	12q13.3	0.403211187	1.66E-15	1.22E-13
KCNF1	2p25.1	0.402345433	1.93E-15	1.41E-13
SLC36A1	5q33.1	0.401712359	2.16E-15	1.56E-13
ST6GALNAC4	9q34.11	0.401661278	2.17E-15	1.57E-13
ADGRE5	19p13.12	0.401568428	2.21E-15	1.59E-13
PRMT2	21q22.3	0.401421822	2.27E-15	1.62E-13
STX7	6q23.2	0.401253868	2.33E-15	1.66E-13
RNF34	12q24.31	0.401177221	2.37E-15	1.67E-13
ARF2P	17q21.31	0.401134782	2.38E-15	1.68E-13
NCEH1	3q26.31	0.400976345	2.45E-15	1.71E-13
SAPCD2	9q34.3	0.400948053	2.46E-15	1.71E-13
NALF2	Xq13.1	0.400834322	2.51E-15	1.74E-13
PAG1	8q21.13	0.400817933	2.52E-15	1.74E-13
NBEAL2	3p21.31	0.400756179	2.54E-15	1.75E-13
AGRN	1p36.33	0.400255918	2.78E-15	1.89E-13
WNK2	9q22.31	0.399970781	2.92E-15	1.98E-13
ARID5B	10q21.2	0.399956275	2.92E-15	1.98E-13
CDC42SE1	1q21.3	0.399807869	3.00E-15	2.01E-13
KCNMB4	12q15	0.399529832	3.15E-15	2.10E-13
PDLIM7	5q35.3	0.399272371	3.29E-15	2.19E-13
SLC7A7	14q11.2	0.398939292	3.48E-15	2.31E-13
IL17RD	3p14.3	0.398922493	3.49E-15	2.31E-13
FAM27C	9q13	0.398099298	4.03E-15	2.65E-13
BCAT1	12p12.1	0.398011044	4.09E-15	2.68E-13
PNMA2	8p21.2	0.397612888	4.38E-15	2.82E-13
S100P	4p16.1	0.3975433	4.43E-15	2.84E-13
DYNC1LI1	3p22.3	0.397286244	4.63E-15	2.94E-13
UBE2Q2	15q24.2	0.397182334	4.71E-15	2.98E-13
CDH17	8q22.1	0.397035709	4.83E-15	3.05E-13
ASRGL1	11q12.3	0.396898639	4.95E-15	3.11E-13
ABCC5	3q27.1	0.396328675	5.45E-15	3.38E-13
HDAC7	12q13.11	0.3960707	5.70E-15	3.51E-13
FUT8	14q23.3	0.395947242	5.82E-15	3.57E-13
SPRING1	12q24.22	0.395741479	6.03E-15	3.69E-13
CTTNBP2NL	1p13.2	0.395677179	6.09E-15	3.72E-13
PRKCI	3q26.2	0.395279567	6.52E-15	3.96E-13
HOXC6	12q13.13	0.395195403	6.61E-15	4.01E-13
CMTM7	3p22.3	0.395011278	6.82E-15	4.12E-13
TRPC1	3q23	0.394968068	6.87E-15	4.14E-13
NCBP2	3q29	0.394749959	7.13E-15	4.27E-13
IQSEC2	Xp11.22	0.394358135	7.62E-15	4.55E-13
PRKCD	3p21.1	0.394207003	7.82E-15	4.65E-13
MGAT4A	2q11.2	0.394192085	7.84E-15	4.65E-13
SMARCD1	12q13.12	0.394183854	7.85E-15	4.65E-13
CKMT1B	15q15.3	0.393784741	8.40E-15	4.94E-13
TCERG1	5q32	0.393718573	8.50E-15	4.98E-13
TMC6	17q25.3	0.393626751	8.63E-15	5.05E-13
TSPAN3	15q24.3	0.393459826	8.88E-15	5.18E-13
MTHFD2	2p13.1	0.393271296	9.16E-15	5.33E-13
SMPDL3B	1p35.3	0.393251044	9.19E-15	5.33E-13
BLVRA	7p13	0.392838422	9.86E-15	5.70E-13
SEMA4D	9q22.2	0.392778751	9.96E-15	5.74E-13
SLC45A4	8q24.3	0.392563497	1.03E-14	5.94E-13
MAGED4B	Xp11.22	0.391941178	1.15E-14	6.55E-13
MARCKSL1	1p35.1	0.391683321	1.20E-14	6.83E-13
EHBP1L1	11q13.1	0.391379306	1.26E-14	7.16E-13
IKBKE	1q32.1	0.390888047	1.37E-14	7.71E-13
HPSE	4q21.23	0.390851929	1.38E-14	7.71E-13
CCNJL	5q33.3	0.390753909	1.40E-14	7.80E-13
STK39	2q24.3	0.390752758	1.40E-14	7.80E-13
PITX1	5q31.1	0.390628744	1.43E-14	7.94E-13
SLC35E4	22q12.2	0.390581717	1.44E-14	7.98E-13
ASNS	7q21.3	0.390267929	1.52E-14	8.39E-13
TLCD3A	17p13.3	0.390176672	1.54E-14	8.50E-13
CDS1	4q21.23	0.389476153	1.73E-14	9.50E-13
NEFH	22q12.2	0.389322474	1.78E-14	9.72E-13
IL20RA	6q23.3	0.389265737	1.80E-14	9.78E-13
TANC2	17q23.2-q23.3	0.389229855	1.81E-14	9.81E-13
RELT	11q13.4	0.389206192	1.81E-14	9.83E-13
KRBA1	7q36.1	0.388997857	1.88E-14	1.01E-12
SELENON	1p36.11	0.388955933	1.89E-14	1.02E-12
PPP2R3A	3q22.2-q22.3	0.388676096	1.98E-14	1.06E-12
ZDHHC7	16q24.1	0.388602278	2.00E-14	1.07E-12
DMBX1	1p33	0.38854276	2.02E-14	1.08E-12
TMC7	16p12.3	0.388511743	2.04E-14	1.08E-12
TMC5	16p12.3	0.388290898	2.11E-14	1.11E-12
SLC9A1	1p36.11	0.388217759	2.14E-14	1.12E-12
VASP	19q13.32	0.388104589	2.18E-14	1.14E-12
UNC13A	19p13.11	0.388066993	2.19E-14	1.14E-12
TMED3	15q25.1	0.387904742	2.25E-14	1.17E-12
NRSN2	20p13	0.387727272	2.32E-14	1.20E-12
CHST10	2q11.2	0.387662713	2.34E-14	1.21E-12
EPB41L2	6q23.1-q23.2	0.387634678	2.35E-14	1.22E-12
DAB2	5p13.1	0.387608443	2.36E-14	1.22E-12
DLL3	19q13.2	0.387571373	2.38E-14	1.22E-12
DBNDD2	20q13.12	0.38753797	2.39E-14	1.23E-12
CTNND2	5p15.2	0.387504163	2.41E-14	1.23E-12
TNFRSF21	6p12.3	0.387377217	2.46E-14	1.25E-12
PDE4D	5q11.2-q12.1	0.387272793	2.50E-14	1.27E-12
TC2N	14q32.12	0.387035651	2.60E-14	1.32E-12
XXYLT1	3q29	0.386883386	2.67E-14	1.34E-12
TOR4A	9q34.3	0.386519958	2.83E-14	1.42E-12
BLM	15q26.1	0.386491408	2.84E-14	1.42E-12
SERPINH1	11q13.5	0.386037444	3.07E-14	1.53E-12
KCTD10	12q24.11	0.386004546	3.08E-14	1.53E-12
ZNF8	19q13.43	0.385902412	3.13E-14	1.55E-12
VPS37C	11q12.2	0.385852257	3.16E-14	1.56E-12
QPCT	2p22.2	0.385719283	3.23E-14	1.59E-12
PTP4A3	8q24.3	0.385565475	3.31E-14	1.63E-12
G6PD	Xq28	0.385516606	3.34E-14	1.64E-12
CIB2	15q25.1	0.385047724	3.61E-14	1.76E-12
OSBPL3	7p15.3	0.38495796	3.66E-14	1.77E-12
FNDC3B	3q26.31	0.384853021	3.73E-14	1.80E-12
FOXL1	16q24.1	0.384696246	3.82E-14	1.84E-12
RUNDC3A	17q21.31	0.384517026	3.94E-14	1.88E-12
HOMER3	19p13.11	0.384505435	3.94E-14	1.88E-12
CXCL5	4q13.3	0.384462493	3.97E-14	1.89E-12
SGPP2	2q36.1	0.384432776	3.99E-14	1.90E-12
DDR1	6p21.33	0.38435456	4.04E-14	1.92E-12
MPP2	17q21.31	0.384165387	4.17E-14	1.97E-12
TMEM132A	11q12.2	0.384101729	4.21E-14	1.98E-12
MISP	19p13.3	0.38395182	4.32E-14	2.03E-12
FGD6	12q22	0.383871532	4.38E-14	2.05E-12
CBX6	22q13.1	0.383659339	4.53E-14	2.11E-12
PHLDB1	11q23.3	0.383484183	4.66E-14	2.17E-12
ITGA5	12q13.13	0.383437372	4.70E-14	2.17E-12
ENTPD1	10q24.1	0.383436601	4.70E-14	2.17E-12
MTHFD1L	6q25.1	0.383413709	4.72E-14	2.17E-12
BEND6	6p12.1	0.383298875	4.81E-14	2.21E-12
LPAR2	19p13.11	0.383275077	4.82E-14	2.21E-12
PRSS35	6q14.2	0.383114383	4.95E-14	2.27E-12
NEURL1	10q24.33	0.382860426	5.16E-14	2.35E-12
CHMP3	2p11.2	0.382469282	5.50E-14	2.49E-12
B3GALNT1	3q26.1	0.382088339	5.85E-14	2.62E-12
SMARCD3	7q36.1	0.382045643	5.90E-14	2.64E-12
LARP4B	10p15.3	0.38198803	5.95E-14	2.66E-12
F3	1p21.3	0.381937361	6.00E-14	2.67E-12
SACS	13q12.12	0.381677328	6.26E-14	2.77E-12
ARF3	12q13.12	0.381622543	6.31E-14	2.79E-12
PCYOX1L	5q32	0.381426965	6.52E-14	2.86E-12
DIRAS1	19p13.3	0.38133573	6.62E-14	2.90E-12
NXPH4	12q13.3	0.38119234	6.77E-14	2.96E-12
ZNF714	19p12	0.381092447	6.88E-14	2.99E-12
IKZF4	12q13.2	0.381090132	6.88E-14	2.99E-12
ITM2C	2q37.1	0.381080511	6.90E-14	2.99E-12
ZNF439	19p13.2	0.381016468	6.97E-14	3.01E-12
TNFSF9	19p13.3	0.380641758	7.40E-14	3.18E-12
TRERF1	6p21.1	0.380439149	7.65E-14	3.27E-12
DTNBP1	6p22.3	0.380248304	7.89E-14	3.36E-12
GALNT7	4q34.1	0.380197892	7.95E-14	3.36E-12
ATP1B3	3q23	0.380136678	8.03E-14	3.39E-12
DENND3	8q24.3	0.380038965	8.16E-14	3.43E-12
KIF2A	5q12.1	0.379903909	8.34E-14	3.50E-12
BCL11A	2p16.1	0.379846619	8.42E-14	3.53E-12
GMIP	19p13.11	0.379568258	8.81E-14	3.67E-12
CNOT2	12q15	0.379553083	8.83E-14	3.68E-12
MCF2L2	3q27.1	0.37875124	1.00E-13	4.17E-12
MLLT3	9p21.3	0.37842936	1.06E-13	4.37E-12
GYG1	3q24	0.378166755	1.10E-13	4.52E-12
PLBD1	12p13.1	0.378131261	1.11E-13	4.54E-12
ZNF711	Xq21.1	0.378086479	1.12E-13	4.56E-12
PPFIA4	1q32.1	0.377765764	1.18E-13	4.79E-12
DNAH10	12q24.31	0.377700077	1.19E-13	4.83E-12
DENND6A	3p14.3	0.3769062	1.35E-13	5.47E-12
MARVELD1	10q24.2	0.376793545	1.37E-13	5.55E-12
UNC5B	10q22.1	0.376661343	1.40E-13	5.65E-12
LDAF1	16p12.3	0.37634061	1.48E-13	5.91E-12
TMEM201	1p36.22	0.376289732	1.49E-13	5.94E-12
GAL3ST4	7q22.1	0.376215609	1.51E-13	5.99E-12
MPZL1	1q24.2	0.376201205	1.51E-13	5.99E-12
MCOLN3	1p22.3	0.376200572	1.51E-13	5.99E-12
MCU	10q22.1	0.376004702	1.56E-13	6.17E-12
GTPBP4	10p15.3	0.375780163	1.62E-13	6.37E-12
RAP1GAP	1p36.12	0.375735924	1.63E-13	6.39E-12
HOXC4	12q13.13	0.375676265	1.64E-13	6.43E-12
GPRIN3	4q22.1	0.375673423	1.64E-13	6.43E-12
ADAM17	2p25.1	0.37554405	1.68E-13	6.55E-12
CBFB	16q22.1	0.375374038	1.72E-13	6.70E-12
SH3BP1	22q13.1	0.375350376	1.73E-13	6.71E-12
SLC4A3	2q35	0.375271605	1.75E-13	6.79E-12
ABR	17p13.3	0.375156701	1.78E-13	6.89E-12
SLC38A1	12q13.11	0.374966628	1.84E-13	7.07E-12
PLXNA3	Xq28	0.37492136	1.85E-13	7.10E-12
CR2	1q32.2	0.374828068	1.88E-13	7.18E-12
TMEM165	4q12	0.374768581	1.90E-13	7.22E-12
CASC15	6p22.3	0.374723232	1.91E-13	7.26E-12
KCNH2	7q36.1	0.374669037	1.93E-13	7.30E-12
AGR2	7p21.1	0.374662703	1.93E-13	7.30E-12
INPP5J	22q12.2	0.374567825	1.96E-13	7.40E-12
CBL	11q23.3	0.374364771	2.02E-13	7.63E-12
ZSWIM6	5q12.1	0.374224338	2.07E-13	7.79E-12
PARP8	5q11.1	0.374134317	2.10E-13	7.88E-12
MAP7D1	1p34.3	0.374080819	2.12E-13	7.90E-12
CEP170	1q43	0.374080561	2.12E-13	7.90E-12
ADAMTS3	4q13.3	0.374069394	2.12E-13	7.90E-12
PIMREG	17p13.2	0.374038299	2.13E-13	7.93E-12
SERPINE2	2q36.1	0.373756228	2.23E-13	8.23E-12
CCDC136	7q32.1	0.37360367	2.28E-13	8.40E-12
ZNF101	19p13.11	0.373567954	2.30E-13	8.43E-12
NAA40	11q13.1	0.373094185	2.47E-13	9.04E-12
ETV5	3q27.2	0.37306615	2.48E-13	9.06E-12
SLC4A5	2p13.1	0.372912085	2.55E-13	9.27E-12
SPINT1	15q15.1	0.37288225	2.56E-13	9.29E-12
CCNI2	5q31.1	0.372858365	2.57E-13	9.31E-12
DGKA	12q13.2	0.372807403	2.59E-13	9.37E-12
SLC35F2	11q22.3	0.37268757	2.64E-13	9.53E-12
IGF2BP2	3q27.2	0.372524503	2.71E-13	9.76E-12
METTL9	16p12.2	0.372415425	2.75E-13	9.91E-12
SLC26A2	5q32	0.372347266	2.78E-13	1.00E-11
ZNF430	19p12	0.372279652	2.81E-13	1.01E-11
PPP2R2C	4p16.1	0.372008221	2.93E-13	1.05E-11
SLC16A3	17q25.3	0.371878384	3.00E-13	1.07E-11
GPX8	5q11.2	0.371841089	3.01E-13	1.07E-11
FSD1L	9q31.2	0.371748777	3.06E-13	1.08E-11
MUC12	7q22.1	0.371700802	3.08E-13	1.09E-11
PPP1R18	6p21.33	0.371539647	3.16E-13	1.12E-11
PRRX2	9q34.11	0.371427817	3.21E-13	1.13E-11
PLEKHA2	8p11.22	0.371254151	3.30E-13	1.16E-11
HILPDA	7q32.1	0.371230231	3.32E-13	1.17E-11
ARHGEF3	3p14.3	0.370983572	3.45E-13	1.21E-11
HIF1A	14q23.2	0.370772151	3.56E-13	1.24E-11
MAP1A	15q15.3	0.370676214	3.62E-13	1.26E-11
ZNF708	19p12	0.370600853	3.66E-13	1.27E-11
GIT2	12q24.11	0.370544269	3.69E-13	1.28E-11
BTBD10	11p15.3	0.370403064	3.77E-13	1.31E-11
MINAR1	15q25.1	0.370319735	3.82E-13	1.32E-11
S100A6	1q21.3	0.370316386	3.83E-13	1.32E-11
APLP1	19q13.12	0.370146122	3.93E-13	1.35E-11
LRRC75A	17p11.2	0.3700519	3.99E-13	1.37E-11
SELENOM	22q12.2	0.369880683	4.09E-13	1.40E-11
KLHDC8A	1q32.1	0.369862144	4.11E-13	1.41E-11
GULP1	2q32.1-q32.2	0.36976814	4.17E-13	1.42E-11
RAB38	11q14.2	0.369619152	4.27E-13	1.45E-11
TMEM87B	2q13	0.369209896	4.55E-13	1.54E-11
CIP2A	3q13.13	0.368941118	4.74E-13	1.60E-11
GNAZ	22q11.22-q11.23	0.368890964	4.78E-13	1.61E-11
PLAAT5	11q12.3	0.368360614	5.19E-13	1.74E-11
AMPD3	11p15.4	0.368137357	5.37E-13	1.80E-11
KLF4	9q31.2	0.368055566	5.44E-13	1.82E-11
QSOX1	1q25.2	0.368014414	5.47E-13	1.83E-11
SOAT1	1q25.2	0.367916419	5.56E-13	1.85E-11
TGFB1	19q13.2	0.367649442	5.79E-13	1.93E-11
GTDC1	2q22.3	0.367612404	5.83E-13	1.94E-11
TASOR	3p14.3	0.367360345	6.06E-13	2.01E-11
CA9	9p13.3	0.367210804	6.20E-13	2.05E-11
DUOX2	15q21.1	0.36717599	6.23E-13	2.06E-11
FMNL3	12q13.12	0.367135549	6.27E-13	2.07E-11
BCAS4	20q13.13	0.367108285	6.30E-13	2.07E-11
PFKFB3	10p15.1	0.366880146	6.52E-13	2.14E-11
NIBAN1	1q25.3	0.366782046	6.62E-13	2.17E-11
GLTP	12q24.11	0.366762861	6.64E-13	2.17E-11
CERS1	19p13.11	0.366574546	6.84E-13	2.22E-11
NIBAN2	9q34.11	0.365981991	7.49E-13	2.41E-11
STXBP4	17q22	0.365946239	7.53E-13	2.42E-11
RAVER2	1p31.3	0.365871907	7.62E-13	2.44E-11
DLG3	Xq13.1	0.365464754	8.11E-13	2.60E-11
VANGL2	1q23.2	0.365437585	8.15E-13	2.60E-11
ANKRD13D	11q13.2	0.36527108	8.36E-13	2.65E-11
SFPQ	1p34.3	0.365019277	8.69E-13	2.75E-11
ZNF624	17p11.2	0.364827813	8.95E-13	2.82E-11
GALNT4	12q21.33	0.364815572	8.96E-13	2.82E-11
SP8	7p21.1	0.364759993	9.04E-13	2.84E-11
ADGRB2	1p35.2	0.364471698	9.45E-13	2.97E-11
HSPA12A	10q25.3	0.364294992	9.71E-13	3.03E-11
MARK2	11q13.1	0.364166647	9.90E-13	3.09E-11
KCTD7	7q11.21	0.36395574	1.02E-12	3.18E-11
MMP16	8q21.3	0.363944945	1.02E-12	3.18E-11
RAB31	18p11.22	0.363777755	1.05E-12	3.26E-11
GOLM1	9q21.33	0.363571993	1.08E-12	3.36E-11
LRRN1	3p26.2	0.363566052	1.08E-12	3.36E-11
HCN4	15q24.1	0.36352132	1.09E-12	3.37E-11
MAML1	5q35.3	0.363454708	1.10E-12	3.40E-11
TLCD5	11q23.3	0.363425153	1.11E-12	3.41E-11
LPAR1	9q31.3	0.36315119	1.16E-12	3.54E-11
CENPO	2p23.3	0.363122751	1.16E-12	3.55E-11
YBX3P1	16p11.2	0.36310064	1.16E-12	3.56E-11
NSMAF	8q12.1	0.363030065	1.18E-12	3.59E-11
CHD3	17p13.1	0.362966021	1.19E-12	3.61E-11
CDK16	Xp11.3	0.362900948	1.20E-12	3.64E-11
CLIP2	7q11.23	0.362892355	1.20E-12	3.64E-11
INPP5F	10q26.11	0.362696214	1.24E-12	3.74E-11
IVNS1ABP	1q25.3	0.362468332	1.28E-12	3.87E-11
ZNF738	19p12	0.362464111	1.28E-12	3.87E-11
YBX3	12p13.2	0.362394	1.30E-12	3.89E-11
SNHG28	1q23.2	0.362240822	1.33E-12	3.96E-11
GPR161	1q24.2	0.362234452	1.33E-12	3.96E-11
FAM98B	15q14	0.362230933	1.33E-12	3.96E-11
PPP2R2B	5q32	0.36217094	1.34E-12	3.99E-11
ZNF469	16q24.2	0.362112362	1.35E-12	4.02E-11
FMOD	1q32.1	0.362043174	1.37E-12	4.05E-11
CORO1C	12q24.11	0.361926147	1.39E-12	4.12E-11
KLHL38	8q24.13	0.361918101	1.39E-12	4.12E-11
TMSB4XP8	4q22.1	0.361850014	1.41E-12	4.16E-11
LDB1	10q24.32	0.361720126	1.44E-12	4.22E-11
FBXO41	2p13.2	0.361714514	1.44E-12	4.22E-11
OXTR	3p25.3	0.361686117	1.44E-12	4.23E-11
NRCAM	7q31.1	0.361657393	1.45E-12	4.24E-11
OTUD3	1p36.13	0.361585866	1.47E-12	4.28E-11
PLAUR	19q13	0.361544714	1.48E-12	4.30E-11
LAMP5	20p12.2	0.361414305	1.50E-12	4.38E-11
LARP6	15q23	0.361340003	1.52E-12	4.43E-11
EDA	Xq13.1	0.361241985	1.54E-12	4.48E-11
DR1	1p22.1	0.361223723	1.55E-12	4.49E-11
PROSER1	13q13.3	0.360926653	1.62E-12	4.68E-11
AMIGO2	12q13.11	0.360837404	1.64E-12	4.73E-11
PIGS	17q11.2	0.360832517	1.64E-12	4.73E-11
SHCBP1	16q11.2	0.360793831	1.65E-12	4.74E-11
RHOV	15q15.1	0.360670875	1.68E-12	4.82E-11
TGFA	2p13.3	0.360488016	1.73E-12	4.94E-11
ADA	20q13.12	0.360091256	1.84E-12	5.22E-11
IGF2BP3	7p15.3	0.359904012	1.89E-12	5.36E-11
PTGER4	5p13.1	0.35987752	1.90E-12	5.37E-11
OSMR	5p13.1	0.359775153	1.93E-12	5.45E-11
FRMD8	11q13.1	0.359730656	1.94E-12	5.47E-11
CERS5	12q13.12	0.359715996	1.94E-12	5.47E-11
FZD2	17q21.31	0.359703287	1.95E-12	5.47E-11
BEST1	11q12.3	0.359582507	1.98E-12	5.56E-11
FREM1	9p22.3	0.359544563	2.00E-12	5.58E-11
MMP14	14q11.2	0.359488113	2.01E-12	5.61E-11
EFHC2	Xp11.3	0.359335984	2.06E-12	5.73E-11
ZNF273	7q11.21	0.359330085	2.06E-12	5.73E-11
SLC22A15	1p13.1	0.359093313	2.14E-12	5.90E-11
ECT2	3q26.31	0.359057554	2.15E-12	5.92E-11
MTF2	1p22.1	0.359014344	2.16E-12	5.95E-11
ESYT3	3q22.3	0.358935338	2.19E-12	6.00E-11
COL8A2	1p34.3	0.358932062	2.19E-12	6.00E-11
DNAJA4	15q25.1	0.358635483	2.29E-12	6.25E-11
GPRIN1	5q35.2	0.358430001	2.36E-12	6.44E-11
PPP1R12A	12q21.2-q21.31	0.358228073	2.43E-12	6.62E-11
GMEB1	1p35.3	0.35811336	2.47E-12	6.72E-11
AMD1	6q21	0.358076065	2.49E-12	6.75E-11
EZR	6q25.3	0.358007135	2.51E-12	6.81E-11
SPIN1	9q22.1	0.357944634	2.54E-12	6.87E-11
ORAI2	7q22.1	0.357803687	2.59E-12	6.96E-11
FGD3	9q22.31	0.357799571	2.59E-12	6.96E-11
EIF5A2	3q26.2	0.357760734	2.61E-12	6.99E-11
CLEC2D	12p13.31	0.357534137	2.70E-12	7.21E-11
PTBP3	9q32	0.357252242	2.81E-12	7.51E-11
VSIG1	Xq22.3	0.357191359	2.84E-12	7.57E-11
CD24	6q21	0.357152447	2.86E-12	7.60E-11
FA2H	16q23.1	0.357144839	2.86E-12	7.60E-11
ZNF107	7q11.21	0.357123278	2.87E-12	7.61E-11
C2ORF81	2p13.1	0.35703259	2.91E-12	7.70E-11
STARD3NL	7p14-p13	0.356988866	2.93E-12	7.74E-11
NHS	Xp22.2-p22.13	0.356904595	2.96E-12	7.83E-11
SEPTIN2	2q37.3	0.356870295	2.98E-12	7.85E-11
ABCC10	6p21.1	0.356776158	3.02E-12	7.95E-11
INAVA	1q32.1	0.356756703	3.03E-12	7.96E-11
MTA2	11q12.3	0.356706608	3.05E-12	8.01E-11
NSD2	4p16.3	0.356610413	3.10E-12	8.12E-11
DEPDC1B	5q12.1	0.356447966	3.17E-12	8.30E-11
CEP72	5p15.33	0.356408614	3.19E-12	8.34E-11
ANO9	11p15.5	0.35620691	3.29E-12	8.57E-11
SH3D21	1p34.3	0.35609534	3.34E-12	8.70E-11
GJA3	13q12.11	0.355989179	3.40E-12	8.82E-11
FMNL2	2q23.3	0.355931759	3.43E-12	8.89E-11
CERCAM	9q34.11	0.355899608	3.44E-12	8.92E-11
SYK	9q22.2	0.355858198	3.46E-12	8.96E-11
CD101	1p13.1	0.355821487	3.48E-12	9.00E-11
CCDC43	17q21.31	0.355534379	3.63E-12	9.38E-11
OLA1	2q31.1	0.355496056	3.65E-12	9.42E-11
SGTB	5q12.3	0.355376199	3.72E-12	9.58E-11
MKI67	10q26.2	0.355364625	3.73E-12	9.58E-11
ARHGAP27	17q21.31	0.355299295	3.76E-12	9.66E-11
PLCB1	20p12.3	0.355262258	3.78E-12	9.70E-11
ODF2L	1p22.3	0.35525197	3.79E-12	9.70E-11
FAM225B	9q32	0.355156738	3.84E-12	9.82E-11
CDCP1	3p21.31	0.355150117	3.85E-12	9.82E-11
GPR160	3q26.2	0.355144201	3.85E-12	9.82E-11
PKP3	11p15.5	0.35499609	3.94E-12	1.00E-10
PLEKHB1	11q13.4	0.354968179	3.95E-12	1.00E-10
DLK2	6p21.1	0.354876465	4.01E-12	1.02E-10
ZNF14	19p13.11	0.35454059	4.21E-12	1.07E-10
RYR1	19q13.2	0.354532735	4.22E-12	1.07E-10
ZNF431	19p12	0.354475215	4.25E-12	1.07E-10
BLTP3A	6p21.31	0.354414257	4.29E-12	1.08E-10
CACNB3	12q13.12	0.354406027	4.29E-12	1.08E-10
RASGEF1A	10q11.21	0.354405281	4.30E-12	1.08E-10
PHIP	6q14.1	0.353938173	4.60E-12	1.15E-10
RAB3IL1	11q12.2-q12.3	0.353934315	4.60E-12	1.15E-10
ZBTB40	1p36.12	0.353876702	4.64E-12	1.16E-10
CLIC3	9q34.3	0.353866488	4.65E-12	1.16E-10
SMOX	20p13	0.353781279	4.71E-12	1.18E-10
CD1A	1q23.1	0.353747167	4.73E-12	1.18E-10
IGFBP3	7p12.3	0.353390844	4.99E-12	1.24E-10
WSB1	17q11.1	0.353244238	5.10E-12	1.27E-10
RGS19	20q13.33	0.35293868	5.33E-12	1.32E-10
PLA2G4A	1q31.1	0.352934035	5.34E-12	1.32E-10
CDKL2	4q21.1	0.352927028	5.34E-12	1.32E-10
TNIK	3q26.2-q26.31	0.352863214	5.39E-12	1.33E-10
PRDM4	12q23.3	0.352799276	5.44E-12	1.34E-10
FUBP1	1p31.1	0.352759924	5.47E-12	1.34E-10
TFF1	21q22.3	0.35275291	5.48E-12	1.34E-10
TMEM200A	6q23.1	0.352731358	5.50E-12	1.35E-10
MFSD6	2q32.2	0.352422472	5.75E-12	1.41E-10
KIF5B	10p11.22	0.352330651	5.83E-12	1.42E-10
LMNB2	19p13.3	0.352292842	5.86E-12	1.43E-10
COL16A1	1p35.2	0.352198387	5.94E-12	1.45E-10
GCNT1	9q21.13	0.352123087	6.01E-12	1.46E-10
SIGLEC10	19q13.41	0.352063159	6.06E-12	1.47E-10
ZNF296	19q13.32	0.351932008	6.18E-12	1.50E-10
CKMT1A	15q15.3	0.351912119	6.20E-12	1.50E-10
VEGFB	11q13.1	0.351892633	6.22E-12	1.50E-10
LINC02210	17q21.31	0.351813257	6.29E-12	1.52E-10
PIP5K1C	19p13.3	0.351657806	6.43E-12	1.55E-10
CHST2	3q24	0.351199726	6.88E-12	1.65E-10
PLXDC1	17q12	0.351132596	6.95E-12	1.66E-10
POU2AF3	11q23.1	0.351082024	7.00E-12	1.67E-10
GFPT2	5q35.3	0.351055731	7.03E-12	1.68E-10
KIF5A	12q13.3	0.350982266	7.10E-12	1.69E-10
SPRY4	5q31.3	0.350884395	7.20E-12	1.71E-10
RAB8B	15q22.2	0.350805948	7.29E-12	1.73E-10
KIF23	15q23	0.350732387	7.37E-12	1.75E-10
OLFML2B	1q23.3	0.350692778	7.41E-12	1.75E-10
ATP1A1	1p13.1	0.350675545	7.43E-12	1.76E-10
ACAN	15q26.1	0.350659601	7.45E-12	1.76E-10
HASPIN	17p13.2	0.350539295	7.58E-12	1.79E-10
ARNT2	15q25.1	0.350293304	7.85E-12	1.85E-10
SUSD5	3p22.3	0.350120824	8.05E-12	1.89E-10
OTULINL	5p15.2	0.35002945	8.16E-12	1.91E-10
GRIN2D	19q13.33	0.349994985	8.20E-12	1.91E-10
RNFT2	12q24.22	0.349979295	8.22E-12	1.92E-10
RTKN2	10q21.2	0.349822391	8.41E-12	1.96E-10
TRNP1	1p36.11	0.34979025	8.45E-12	1.96E-10
MAPK7	17p11.2	0.349690607	8.57E-12	1.99E-10
RAB35	12q24.23	0.34965419	8.62E-12	2.00E-10
SLC26A9	1q32.1	0.349422285	8.91E-12	2.06E-10
B3GNT3	19p13.11	0.349420645	8.92E-12	2.06E-10
CDK5R2	2q35	0.349372539	8.98E-12	2.07E-10
MEAK7	16q24.1	0.349349918	9.01E-12	2.07E-10
ZNF207	17q11.2	0.349305679	9.07E-12	2.08E-10
CCR6	6q27	0.349288703	9.09E-12	2.09E-10
ZNF85	19p12	0.348964694	9.53E-12	2.18E-10
MUC5B	11p15.5	0.3489642	9.53E-12	2.18E-10
ADO	10q21.3	0.348941629	9.56E-12	2.18E-10
PDGFRL	8p22	0.348880264	9.64E-12	2.20E-10
EPHX4	1p22.1	0.348815109	9.74E-12	2.22E-10
CAPZA1	1p13.2	0.348756549	9.82E-12	2.23E-10
SEPTIN8	5q31.1	0.348731086	9.85E-12	2.24E-10
KCNJ5-AS1	11q24.3	0.348700501	9.90E-12	2.25E-10
EPS8L1	19q13.42	0.348685159	9.92E-12	2.25E-10
WNT10B	12q13.12	0.348599647	1.00E-11	2.27E-10
CCDC112	5q22.3	0.34856879	1.01E-11	2.28E-10
MAGED4	Xp11.22	0.348530053	1.01E-11	2.29E-10
PRAME	22q11.22	0.348459584	1.02E-11	2.31E-10
SPDL1	5q35.1	0.348315702	1.05E-11	2.35E-10
EPHB6	7q34	0.348169353	1.07E-11	2.39E-10
FOCAD	9p21.3	0.348124343	1.08E-11	2.40E-10
ALOX5	10q11.21	0.348106081	1.08E-11	2.40E-10
NKX3-2	4p15.33	0.348034025	1.09E-11	2.43E-10
B3GALT2	1q31.2	0.348029266	1.09E-11	2.43E-10
DLGAP5	14q22.3	0.348005	1.09E-11	2.43E-10
BEND3	6q21	0.347863281	1.12E-11	2.48E-10
SV2A	1q21.2	0.347862789	1.12E-11	2.48E-10
E2F3	6p22.3	0.347643629	1.15E-11	2.55E-10
PLEKHG2	19q13.2	0.347633341	1.15E-11	2.55E-10
LSP1P5	1q21.1	0.347547949	1.17E-11	2.58E-10
B3GNT9	16q22.1	0.347455099	1.19E-11	2.61E-10
BRPF1	3p25.3	0.347386168	1.20E-11	2.64E-10
NREP	5q22.1	0.347267854	1.22E-11	2.68E-10
NXPE3	3q12.3	0.347188121	1.23E-11	2.70E-10
PRKX	Xp22.33	0.347053861	1.26E-11	2.75E-10
TMCC2	1q32.1	0.346969755	1.27E-11	2.78E-10
ELOVL7	5q12.1	0.346948803	1.27E-11	2.79E-10
SH3PXD2B	5q35.1	0.34686353	1.29E-11	2.82E-10
RAN	12q24.33	0.3468571	1.29E-11	2.82E-10
CDC7	1p22.1	0.346763115	1.31E-11	2.85E-10
NUP43	6q25.1	0.346756791	1.31E-11	2.85E-10
ACTR3	2q14.1	0.346684002	1.32E-11	2.88E-10
ZNF589	3p21.31	0.346659719	1.33E-11	2.89E-10
CRLF3	17q11.2	0.346500873	1.36E-11	2.95E-10
POF1B	Xq21.1	0.346422167	1.38E-11	2.98E-10
HOXB13	17q21.32	0.346351933	1.39E-11	3.00E-10
DCLRE1C	10p13	0.345768872	1.51E-11	3.25E-10
SEMA6A	5q23.1	0.345758069	1.51E-11	3.25E-10
ATP2B1	12q21.33	0.345673964	1.53E-11	3.28E-10
IARS1	9q22.31	0.345653902	1.54E-11	3.29E-10
ALDOA	16p11.2	0.345492378	1.57E-11	3.36E-10
PAFAH1B3	19q13.1	0.345408272	1.59E-11	3.40E-10
UBASH3B	11q24.1	0.345376122	1.60E-11	3.41E-10
SLC6A17	1p13.3	0.345149759	1.65E-11	3.52E-10
G2E3	14q12	0.345051788	1.67E-11	3.56E-10
CCDC74A	2q21.1	0.345014858	1.68E-11	3.57E-10
HDAC9	7p21.1	0.345010143	1.68E-11	3.57E-10
CENPE	4q24	0.344976684	1.69E-11	3.59E-10
SSBP2	5q14.1	0.344740057	1.75E-11	3.70E-10
ZNF488	10q11.22	0.344490931	1.81E-11	3.83E-10
PAM	5q21.1	0.344463049	1.82E-11	3.84E-10
FKBP10	17q21.2	0.344419067	1.83E-11	3.86E-10
EED	11q14.2	0.344179096	1.90E-11	3.98E-10
HSF2BP	21q22.3	0.344120799	1.91E-11	4.00E-10
GUCY1B1	4q32.1	0.344039434	1.93E-11	4.04E-10
GTSE1	22q13.31	0.343990823	1.95E-11	4.07E-10
AFAP1	4p16.1	0.343914176	1.97E-11	4.10E-10
INTS8	8q22.1	0.343813352	2.00E-11	4.15E-10
GLB1L2	11q25	0.343767945	2.01E-11	4.17E-10
OXCT1	5p13.1	0.343660059	2.04E-11	4.23E-10
VCAN	5q14.2-q14.3	0.343649514	2.04E-11	4.23E-10
ZFP69B	1p34.2	0.343574454	2.07E-11	4.26E-10
FBXL19	16p11.2	0.34357186	2.07E-11	4.26E-10
MMD	17q22	0.343322608	2.14E-11	4.41E-10
BASP1	5p15.1	0.343291123	2.15E-11	4.43E-10
GFPT1	2p13.3	0.343166228	2.19E-11	4.50E-10
CTSK	1q21.3	0.343012163	2.24E-11	4.57E-10
CRABP2	1q23.1	0.343011994	2.24E-11	4.57E-10
GRAMD1A	19q13.11	0.342983356	2.25E-11	4.59E-10
CCAR1	10q21.3	0.342949148	2.26E-11	4.61E-10
WDR54	2p13.1	0.342914426	2.27E-11	4.62E-10
TRIM46	1q22	0.342711261	2.34E-11	4.75E-10
CYRIA	2p24.2	0.342677177	2.35E-11	4.77E-10
MSRB3	12q14.3	0.342462519	2.42E-11	4.89E-10
GLI1	12q13.3	0.34236445	2.45E-11	4.95E-10
GRM4	6p21.31	0.342359853	2.45E-11	4.95E-10
BUB1B	15q15.1	0.342334174	2.46E-11	4.96E-10
OSBP2	22q12.2	0.342328259	2.47E-11	4.96E-10
OSBPL7	17q21.32	0.342311798	2.47E-11	4.97E-10
PNCK	Xq28	0.342259243	2.49E-11	5.00E-10
PAQR5	15q23	0.342121687	2.54E-11	5.09E-10
CPEB1	15q25.2	0.342067051	2.56E-11	5.12E-10
ABCG1	21q22.3	0.342026302	2.57E-11	5.14E-10
FHOD1	16q22.1	0.34192342	2.61E-11	5.20E-10
LUZP1	1p36.12	0.341820282	2.65E-11	5.27E-10
UBE2D1	10q21.1	0.341702482	2.69E-11	5.35E-10
ZMIZ1	10q22.3	0.341656186	2.71E-11	5.38E-10
PLOD2	3q24	0.341608603	2.73E-11	5.40E-10
CXCR4	2q22.1	0.341478458	2.78E-11	5.49E-10
KCNG1	20q13.13	0.341409652	2.81E-11	5.54E-10
HOXC5	12q13.13	0.341373832	2.82E-11	5.56E-10
TTYH2	17q25.1	0.341356029	2.83E-11	5.57E-10
ROR1	1p31.3	0.341156456	2.91E-11	5.72E-10
GPR35	2q37.3	0.341152324	2.91E-11	5.72E-10
GBGT1	9q34.2	0.341001602	2.97E-11	5.83E-10
KIF20B	10q23.31	0.340946561	3.00E-11	5.87E-10
CCL26	7q11.23	0.340856541	3.04E-11	5.94E-10
RIMS3	1p34.2	0.340634573	3.13E-11	6.12E-10
MPV17	2p23.3	0.34055021	3.17E-11	6.19E-10
SCN3B	11q24.1	0.340542029	3.17E-11	6.19E-10
JADE2	5q31.1	0.340395888	3.24E-11	6.31E-10
SCD5	4q21.22	0.340328758	3.27E-11	6.36E-10
CASP2	7q34	0.340303037	3.28E-11	6.37E-10
RAB11FIP5	2p13.2	0.340229734	3.32E-11	6.43E-10
NT5C3A	7p14.3	0.340210958	3.32E-11	6.44E-10
CRACD	4q12	0.340176676	3.34E-11	6.47E-10
ENDOD1	11q21	0.340117851	3.37E-11	6.52E-10
CLIC6	21q22.12	0.340069548	3.39E-11	6.54E-10
ZNF195	11p15.5	0.34004712	3.40E-11	6.56E-10
PACS1	11q13.1-q13.2	0.340004167	3.42E-11	6.59E-10
SEPTIN5	22q11.21	0.339839042	3.50E-11	6.73E-10
S100A11	1q21.3	0.339769597	3.54E-11	6.79E-10
RAI1	17p11.2	0.339755708	3.54E-11	6.79E-10
TRIP13	5p15.33	0.339749278	3.55E-11	6.79E-10
NSD1	5q35.3	0.339674689	3.58E-11	6.85E-10
TNFAIP8L3	15q21.2	0.339629164	3.61E-11	6.89E-10
WASF2	1p36.11	0.339471241	3.69E-11	7.04E-10
BACE2	21q22.2-q22.3	0.339101896	3.88E-11	7.40E-10
COLCA1	11q23.1	0.339090473	3.89E-11	7.40E-10
PTGES	9q34.11	0.339013706	3.93E-11	7.47E-10
DTX3	12q13.3	0.338898705	4.00E-11	7.58E-10
CTSC	11q14.2	0.338795567	4.05E-11	7.67E-10
BMP8A	1p34.3	0.338793509	4.05E-11	7.67E-10
TTF2	1p13.1	0.338767017	4.07E-11	7.69E-10
TRIM6	11p15.4	0.338600349	4.17E-11	7.85E-10
CREB1	2q33.3	0.338586203	4.17E-11	7.85E-10
NUDT11	Xp11.22	0.338584939	4.17E-11	7.85E-10
PHF19	9q33.2	0.338579259	4.18E-11	7.85E-10
ZNF37BP	10q11.21	0.338512643	4.22E-11	7.91E-10
CYP19A1	15q21.2	0.338467359	4.24E-11	7.96E-10
PCED1B	12q13.11	0.338344689	4.32E-11	8.08E-10
STRA6	15q24.1	0.338254216	4.37E-11	8.17E-10
STK32C	10q26.3	0.338234091	4.38E-11	8.18E-10
RUBCNL	13q14.13	0.33823167	4.39E-11	8.18E-10
SEPTIN7	7p14.2	0.338217373	4.39E-11	8.19E-10
PRUNE2	9q21.2	0.338136504	4.44E-11	8.27E-10
SLC2A1	1p34.2	0.338132753	4.45E-11	8.27E-10
IFT57	3q13.12-q13.13	0.338112434	4.46E-11	8.28E-10
CYP26B1	2p13.2	0.338076108	4.48E-11	8.32E-10
VWDE	7p21.3	0.337974891	4.55E-11	8.42E-10
FUT4	11q21	0.337961198	4.55E-11	8.43E-10
MST1R	3p21.31	0.33794373	4.57E-11	8.44E-10
ARFGEF3	6q23.3-q24.1	0.33777711	4.67E-11	8.60E-10
WIPF1	2q31.1	0.337774468	4.67E-11	8.60E-10
KRT19	17q21.2	0.337568034	4.81E-11	8.84E-10
EP400	12q24.33	0.337515357	4.85E-11	8.90E-10
PTGFRN	1p13.1	0.337505948	4.85E-11	8.91E-10
FMNL1	17q21.31	0.337490258	4.86E-11	8.91E-10
TLR10	4p14	0.337482899	4.87E-11	8.91E-10
WNT9A	1q42.13	0.337388155	4.93E-11	9.01E-10
ADGRB1	8q24.3	0.337291098	5.00E-11	9.12E-10
ENAH	1q42.12	0.337228682	5.04E-11	9.19E-10
OGFRL1	6q13	0.337153322	5.10E-11	9.26E-10
C4ORF48	4p16.3	0.337147963	5.10E-11	9.26E-10
EID3	12q23.3	0.337068702	5.16E-11	9.33E-10
NAP1L3	Xq21.32	0.337023341	5.19E-11	9.38E-10
WASF1	6q21	0.337002343	5.20E-11	9.40E-10
DAGLA	11q12.2	0.336906663	5.27E-11	9.50E-10
CACHD1	1p31.3	0.336843906	5.32E-11	9.58E-10
GNB4	3q26.33	0.336789121	5.36E-11	9.64E-10
CHORDC1	11q14.3	0.336787064	5.36E-11	9.64E-10
GLDN	15q21.2	0.336767503	5.38E-11	9.65E-10
BRSK2	11p15.5	0.336626741	5.48E-11	9.84E-10
LRRN2	1q32.1	0.336500968	5.58E-11	9.96E-10
CDR2L	17q25.1	0.33648845	5.59E-11	9.97E-10
SERPINB1	6p25.2	0.336465559	5.61E-11	9.99E-10
DCP2	5q22.2	0.33638917	5.67E-11	1.01E-09
KCNH3	12q13.12	0.336119733	5.88E-11	1.04E-09
RIMS4	20q13.12	0.335997583	5.98E-11	1.06E-09
CATSPERB	14q32.12	0.335985525	5.99E-11	1.06E-09
ZNF608	5q23.2	0.335966841	6.01E-11	1.06E-09
MFAP2	1p36.13	0.335908027	6.06E-11	1.07E-09
TSPAN15	10q22.1	0.335882479	6.08E-11	1.07E-09
SRSF10	1p36.11	0.335835046	6.12E-11	1.08E-09
EMILIN2	18p11.32-p11.31	0.33574899	6.19E-11	1.09E-09
PRELID3A	18p11.21	0.335714565	6.22E-11	1.09E-09
STK11IP	2q35	0.335694484	6.24E-11	1.10E-09
TMEM184B	22q13.1	0.335551715	6.36E-11	1.12E-09
TNFSF15	9q32	0.335538968	6.38E-11	1.12E-09
ARMCX6	Xq22.1	0.335470696	6.44E-11	1.13E-09
ZG16B	16p13.3	0.335407183	6.49E-11	1.14E-09
CNPY4	7q22.1	0.335363956	6.53E-11	1.14E-09
NRIP3	11p15.4	0.335208028	6.67E-11	1.16E-09
HTRA3	4p16.1	0.335147648	6.73E-11	1.17E-09
FBXO5	6q25.2	0.335125785	6.75E-11	1.18E-09
CCDC6	10q21.2	0.334967862	6.90E-11	1.20E-09
HEATR6	17q23.1	0.334866267	7.00E-11	1.21E-09
HMGA2	12q14.3	0.334708336	7.15E-11	1.24E-09
NEDD1	12q23.1	0.334695762	7.16E-11	1.24E-09
PNMA8A	19q13.32	0.334659445	7.20E-11	1.25E-09
MAP3K12	12q13.13	0.334615515	7.24E-11	1.25E-09
PSPC1	13q12.11	0.334611635	7.25E-11	1.25E-09
SH2D2A	1q23.1	0.334580921	7.28E-11	1.26E-09
PRKAR2B	7q22.3	0.334507578	7.35E-11	1.27E-09
FAM53B	10q26.13	0.334305563	7.56E-11	1.30E-09
FOXF2	6p25.3	0.334242332	7.62E-11	1.31E-09
GNPDA2	4p12	0.334051703	7.83E-11	1.35E-09
LONRF2	2q11.2	0.334041823	7.84E-11	1.35E-09
IFFO2	1p36.13	0.334040386	7.84E-11	1.35E-09
CDCA4	14q32.33	0.334022018	7.86E-11	1.35E-09
ARL14	3q25.33	0.333844232	8.05E-11	1.38E-09
LINC02870	10q26.3	0.333767826	8.14E-11	1.39E-09
SCMH1	1p34.2	0.333764921	8.14E-11	1.39E-09
SDC3	1p35.2	0.333755147	8.15E-11	1.39E-09
PIP4P2	8q21.3	0.333724797	8.19E-11	1.40E-09
KIF20A	5q31.2	0.333668984	8.25E-11	1.41E-09
HAP1	17q21.2	0.333581707	8.35E-11	1.42E-09
LINGO1	15q24.3	0.33345962	8.49E-11	1.44E-09
CAMSAP2	1q32.1	0.33342747	8.53E-11	1.45E-09
TMCO3	13q34	0.333319959	8.65E-11	1.47E-09
JPH1	8q21.11	0.333285276	8.69E-11	1.47E-09
SCUBE3	6p21.3	0.333250771	8.73E-11	1.48E-09
UBA2	19q13.11	0.333250257	8.74E-11	1.48E-09
TLR2	4q31.3	0.333097478	8.92E-11	1.51E-09
SEMA3C	7q21.11	0.332958925	9.09E-11	1.53E-09
STIP1	11q13.1	0.33292438	9.13E-11	1.54E-09
CKAP4	12q23.3	0.332923351	9.14E-11	1.54E-09
MEX3C	18q21.2	0.332715016	9.40E-11	1.58E-09
LRRC1	6p12.1	0.332679779	9.45E-11	1.59E-09
PLXND1	3q22.1	0.332649686	9.48E-11	1.59E-09
PCYT1B	Xp22.11	0.332637539	9.50E-11	1.59E-09
NAP1L1	12q21.1	0.332610848	9.53E-11	1.60E-09
PRSS16	6p22.1	0.332594171	9.56E-11	1.60E-09
SUZ12P1	17q11.2	0.332571646	9.59E-11	1.60E-09
ARL4C	2q37.1	0.33254449	9.62E-11	1.61E-09
TRA2B	3q27.2	0.332428748	9.78E-11	1.63E-09
DOCK10	2q36.2	0.332402256	9.81E-11	1.63E-09
PIK3R6	17p13.1	0.332232287	1.00E-10	1.67E-09
DBF4	7q21.12	0.332205753	1.01E-10	1.67E-09
SLC52A1	17p13.2	0.33219556	1.01E-10	1.67E-09
PREX1	20q13.13	0.332115474	1.02E-10	1.69E-09
FAM81A	15q22.2	0.33208508	1.02E-10	1.70E-09
SUSD1	9q31.3-q32	0.332037027	1.03E-10	1.71E-09
SLC25A36	3q23	0.331953693	1.04E-10	1.72E-09
CDH11	16q21	0.331943405	1.04E-10	1.72E-09
ASPHD2	22q12.1	0.331916399	1.05E-10	1.73E-09
SLC12A2	5q23.3	0.331898137	1.05E-10	1.73E-09
ITGB8	7p21.1	0.331843526	1.06E-10	1.74E-09
IL12A	3q25.33	0.331783361	1.07E-10	1.76E-09
N4BP3	5q35.3	0.331736356	1.07E-10	1.76E-09
TANC1	2q24.2	0.331734813	1.07E-10	1.76E-09
TMEM185B	2q14.2	0.331657909	1.09E-10	1.78E-09
HTR3A	11q23.2	0.331655762	1.09E-10	1.78E-09
FAM135A	6q13	0.331610841	1.09E-10	1.79E-09
CMTM3	16q22.1	0.33151799	1.11E-10	1.81E-09
PACC1	1q32.3	0.33150976	1.11E-10	1.81E-09
SMAP1	6q13	0.331389388	1.13E-10	1.84E-09
PFN2	3q25.1	0.33137087	1.13E-10	1.84E-09
COL22A1	8q24.23-q24.3	0.331263983	1.15E-10	1.87E-09
BCL11B	14q32.2	0.331006819	1.19E-10	1.93E-09
LDLRAD3	11p13	0.3309916	1.19E-10	1.93E-09
FAR2	12p11.22	0.33097529	1.19E-10	1.94E-09
IFI27L2	14q32.12	0.330933366	1.20E-10	1.95E-09
VCL	10q22.2	0.330839744	1.21E-10	1.97E-09
B4GALT5	20q13.13	0.330795248	1.22E-10	1.98E-09
KIF3A	5q31.1	0.330708313	1.24E-10	2.00E-09
HACD1	10p12.33	0.330618368	1.25E-10	2.02E-09
PLK1	16p12.2	0.330535729	1.27E-10	2.04E-09
CLIC1	6p21.33	0.330422045	1.28E-10	2.07E-09
ATG9B	7q36.1	0.330391024	1.29E-10	2.08E-09
PLEKHO2	15q22.31	0.330266694	1.31E-10	2.11E-09
MYH15	3q13.13	0.330238317	1.32E-10	2.12E-09
PLAGL1	6q24.2	0.330185418	1.33E-10	2.13E-09
SPHK1	17q25.1	0.330062989	1.35E-10	2.17E-09
ELOVL4	6q14.1	0.330039079	1.35E-10	2.17E-09
DENR	12q24.31	0.330033411	1.35E-10	2.17E-09
FAM171B	2q32.1	0.330002032	1.36E-10	2.18E-09
RAB10	2p23.3	0.329937988	1.37E-10	2.19E-09
ZBTB2	6q25.1	0.329877803	1.38E-10	2.21E-09
TRPM2	21q22.3	0.32984876	1.39E-10	2.22E-09
CCDC149	4p15.2	0.329785981	1.40E-10	2.23E-09
COL1A1	17q21.33	0.329783044	1.40E-10	2.23E-09
FRAS1	4q21.21	0.329751252	1.41E-10	2.24E-09
PPP1R9B	17q21.33	0.329617512	1.43E-10	2.28E-09
ANLN	7p14.2	0.329556298	1.44E-10	2.30E-09
KLC2	11q13.2	0.329419723	1.47E-10	2.34E-09
FANCB	Xp22.2	0.329106626	1.54E-10	2.43E-09
NIPSNAP2	7p11.2	0.329062724	1.54E-10	2.44E-09
DOK6	18q22.2	0.3290607	1.54E-10	2.44E-09
ZNF213	16p13.3	0.328940188	1.57E-10	2.48E-09
RTL6	22q13.31	0.328851303	1.59E-10	2.51E-09
MAP4K5	14q22.1	0.328691579	1.62E-10	2.56E-09
RBL1	20q11.23	0.32862342	1.64E-10	2.58E-09
COL11A1	1p21.1	0.328595864	1.64E-10	2.59E-09
CTSV	9q22.33	0.328358535	1.70E-10	2.66E-09
FAM171A2	17q21.31	0.328310123	1.71E-10	2.67E-09
HMGXB3	5q32	0.32830886	1.71E-10	2.67E-09
GGN	19q13.2	0.328186323	1.74E-10	2.71E-09
PTK7	6p21.1	0.328034424	1.77E-10	2.76E-09
TMSB10	2p11.2	0.327987613	1.78E-10	2.78E-09
NTS	12q21.31	0.327984105	1.79E-10	2.78E-09
SDK2	17q25.1	0.327973733	1.79E-10	2.78E-09
GAL3ST1	22q12.2	0.327892983	1.81E-10	2.81E-09
KCNMB3	3q26.32	0.327872278	1.81E-10	2.81E-09
PDE6B	4p16.3	0.327794559	1.83E-10	2.84E-09
ADAM28	8p21.2	0.327771748	1.84E-10	2.85E-09
ADCY3	2p23.3	0.327737868	1.85E-10	2.86E-09
ACIN1	14q11.2	0.327647333	1.87E-10	2.89E-09
MGA	15q15	0.32761724	1.88E-10	2.90E-09
GUCY1A1	4q32.1	0.327480665	1.91E-10	2.95E-09
NAA25	12q24.13	0.327376497	1.94E-10	2.98E-09
SLC37A2	11q24.2	0.327134983	2.00E-10	3.08E-09
DOK1	2p13.1	0.327122272	2.00E-10	3.08E-09
HAPLN3	15q26.1	0.327112092	2.01E-10	3.08E-09
RTL8B	Xq26.3	0.327071968	2.02E-10	3.09E-09
ALDH3B1	11q13.2	0.327017698	2.03E-10	3.11E-09
CENPA	2p23.3	0.327007667	2.04E-10	3.11E-09
MYO6	6q14.1	0.327004324	2.04E-10	3.11E-09
ZNF385A	12q13.13	0.326993007	2.04E-10	3.12E-09
CMTM1	16q21	0.326882666	2.07E-10	3.16E-09
ZNF827	4q31.21-q31.22	0.326818292	2.09E-10	3.18E-09
LINC00265	7p14.1	0.326808484	2.09E-10	3.18E-09
PLPP2	19p13.3	0.326806555	2.09E-10	3.18E-09
ANKRD52	12q13.3	0.32669285	2.12E-10	3.23E-09
SRSF12	6q15	0.326676473	2.13E-10	3.24E-09
LRFN1	19q13.2	0.326661621	2.13E-10	3.24E-09
TMEM243	7q21.12	0.326622376	2.14E-10	3.25E-09
ZNF792	19q13.11	0.326369695	2.22E-10	3.36E-09
AGAP1	2q37.2	0.326292127	2.24E-10	3.39E-09
CDK17	12q23.1	0.326247631	2.25E-10	3.41E-09
GOLGA2P7	15q25.2	0.326247631	2.25E-10	3.41E-09
HEYL	1p34.2	0.3262412	2.26E-10	3.41E-09
SOX11	2p25.2	0.326126044	2.29E-10	3.45E-09
C2CD5	12p12.1	0.325999429	2.33E-10	3.50E-09
RPAP3	12q13.11	0.325994542	2.33E-10	3.50E-09
SEMA4A	1q22	0.325990684	2.33E-10	3.50E-09
DPYSL4	10q26.3	0.325922243	2.35E-10	3.52E-09
DOCK8	9p24.3	0.325777719	2.40E-10	3.59E-09
ZNF675	19p12	0.325750713	2.41E-10	3.60E-09
CCNB1	5q13.2	0.325725764	2.42E-10	3.61E-09
ZNF496	1q44	0.325716248	2.42E-10	3.61E-09
SMC4	3q25.33	0.325632914	2.45E-10	3.65E-09
HACD4	9p21.3	0.325547522	2.47E-10	3.68E-09
PAPOLG	2p16.1	0.32547782	2.50E-10	3.72E-09
TAX1BP3	17p13.2	0.325408889	2.52E-10	3.74E-09
LGALS3BP	17q25	0.325357706	2.54E-10	3.76E-09
TFF2	21q22.3	0.325355275	2.54E-10	3.76E-09
SPACA6	19q13.41	0.325233883	2.58E-10	3.82E-09
KIF15	3p21.31	0.325064494	2.64E-10	3.90E-09
TTC39A	1p32.3	0.324952096	2.68E-10	3.95E-09
CCDC74B	2q21.1	0.324928177	2.69E-10	3.96E-09
EVC2	4p16.2	0.324917714	2.69E-10	3.96E-09
LIMCH1	4p13	0.32491598	2.69E-10	3.96E-09
DMBT1	10q26.13	0.324889132	2.70E-10	3.97E-09
RHOQ	2p21	0.324768452	2.74E-10	4.03E-09
PTGS1	9q33.2	0.324699522	2.77E-10	4.06E-09
VEZT	12q22	0.324662227	2.78E-10	4.08E-09
MYLK2	20q11.21	0.324593486	2.81E-10	4.11E-09
FBXL2	3p22.3	0.324455082	2.86E-10	4.18E-09
SCGB2A1	11q12.3	0.324429513	2.87E-10	4.20E-09
MB21D2	3q29	0.324405538	2.88E-10	4.21E-09
TICRR	15q26.1	0.324294941	2.92E-10	4.26E-09
PCLO	7q21.11	0.324264894	2.93E-10	4.28E-09
SRSF1	17q22	0.324221123	2.95E-10	4.30E-09
ZNF695	1q44	0.324198876	2.96E-10	4.31E-09
MIDEAS	14q24.3	0.324112069	2.99E-10	4.35E-09
ADCY7	16q12.1	0.324087634	3.00E-10	4.36E-09
NTNG2	9q34.13	0.324067058	3.01E-10	4.37E-09
TOP2B	3p24.2	0.323943343	3.06E-10	4.44E-09
PTBP2	1p21.3	0.323929454	3.07E-10	4.44E-09
ZNF211	19q13.4	0.323909135	3.08E-10	4.45E-09
UBE2E1	3p24.2	0.323748897	3.14E-10	4.55E-09
LASP1	17q12	0.323728835	3.15E-10	4.55E-09
TUBB3	16q24.3	0.323610264	3.20E-10	4.62E-09
ADAMTS6	5q12.3	0.32349359	3.25E-10	4.69E-09
RUNX1	21q22.12	0.323488607	3.25E-10	4.69E-09
STK4	20q13.12	0.323367721	3.30E-10	4.76E-09
TRPA1	8q21.11	0.323333486	3.32E-10	4.78E-09
ITGA4	2q31.3	0.32320594	3.38E-10	4.86E-09
CXCL3	4q13.3	0.323182643	3.39E-10	4.87E-09
CD109	6q13	0.323166588	3.39E-10	4.88E-09
MMP10	11q22.2	0.323074823	3.44E-10	4.93E-09
CEP85L	6q22.31	0.323026867	3.46E-10	4.96E-09
CSNK1E	22q13.1	0.322877491	3.53E-10	5.04E-09
RASSF9	12q21.31	0.322875521	3.53E-10	5.04E-09
POU2AF1	11q23.1	0.322855671	3.54E-10	5.05E-09
B3GALT5	21q22.2	0.322806524	3.56E-10	5.08E-09
PRPH	12q13.12	0.322534267	3.69E-10	5.26E-09
PTPN22	1p13.2	0.32242329	3.74E-10	5.32E-09
CDH6	5p13.3	0.322369514	3.77E-10	5.36E-09
PDCL	9q33.2	0.32235794	3.78E-10	5.36E-09
GDF11	12q13.2	0.322337621	3.79E-10	5.37E-09
NCALD	8q22.3	0.322296983	3.81E-10	5.39E-09
MUC1	1q22	0.32224845	3.83E-10	5.42E-09
QTRT2	3q13.31	0.322133916	3.89E-10	5.50E-09
AP1G2	14q11.2	0.322111796	3.90E-10	5.51E-09
RNF39	6p22.1	0.322110537	3.90E-10	5.51E-09
SYT11	1q22	0.321963904	3.98E-10	5.61E-09
BLMH	17q11.2	0.321918636	4.00E-10	5.64E-09
CDC42SE2	5q31.1	0.321846362	4.04E-10	5.69E-09
CELF4	18q12.2	0.32184009	4.04E-10	5.69E-09
TUBA1A	12q13.12	0.321770744	4.08E-10	5.73E-09
ICA1L	2q33.2	0.321714417	4.11E-10	5.77E-09
ADPRH	3q13.33	0.321681494	4.13E-10	5.79E-09
DNAJC10	2q32.1	0.321673778	4.13E-10	5.80E-09
KBTBD2	7p14.3	0.321590444	4.18E-10	5.86E-09
ZNF486	19p12	0.321550399	4.20E-10	5.88E-09
KIAA1614	1q25.3	0.321539596	4.21E-10	5.88E-09
KCNJ12	17p11.2	0.321349419	4.31E-10	6.01E-09
POLD3	11q13.4	0.321267397	4.36E-10	6.08E-09
NABP1	2q32.3	0.321247078	4.37E-10	6.09E-09
DEGS1	1q42.11	0.321223929	4.38E-10	6.10E-09
SLC18B1	6q23.2	0.321209783	4.39E-10	6.11E-09
KSR1	17q11.2	0.320988331	4.52E-10	6.28E-09
DNMT1	19p13.2	0.320969812	4.53E-10	6.29E-09
SGO2	2q33.1	0.320884678	4.58E-10	6.35E-09
DNM1L	12p11.21	0.320865902	4.59E-10	6.36E-09
SLC4A8	12q13.13	0.320826652	4.62E-10	6.39E-09
FAM163A	1q25.2	0.32081593	4.62E-10	6.40E-09
TFAP2E	1p34.3	0.320753893	4.66E-10	6.44E-09
ADAP2	17q11.2	0.320649336	4.73E-10	6.53E-09
SLC37A3	7q34	0.320524078	4.80E-10	6.63E-09
LINC02381	12q13.13	0.320413738	4.87E-10	6.72E-09
PGF	14q24.3	0.320408336	4.88E-10	6.72E-09
IL2RG	Xq13.1	0.320232666	4.99E-10	6.87E-09
SLC66A1L	3q25.32	0.320090775	5.08E-10	6.99E-09
PTPDC1	9q22.32	0.320074229	5.10E-10	7.00E-09
ACTR2	2p14	0.319991924	5.15E-10	7.07E-09
PSORS1C2	6p21.33	0.319988841	5.15E-10	7.07E-09
SLC37A1	21q22.3	0.31997109	5.16E-10	7.08E-09
NALCN	13q32.3-q33.1	0.319960355	5.17E-10	7.09E-09
ADCY5	3q21.1	0.319919875	5.20E-10	7.12E-09
RENBP	Xq28	0.319830143	5.26E-10	7.20E-09
MED15	22q11.21	0.319772786	5.30E-10	7.24E-09
BCAS1	20q13.2	0.319770451	5.30E-10	7.24E-09
MTBP	8q24.12	0.319623094	5.40E-10	7.37E-09
PIAS3	1q21.1	0.319543361	5.46E-10	7.44E-09
METRNL	17q25.3	0.3195269	5.47E-10	7.45E-09
KLHL18	3p21.31	0.319503237	5.49E-10	7.47E-09
LGALSL	2p14	0.319455911	5.52E-10	7.51E-09
COL1A2	7q21.3	0.319341199	5.61E-10	7.62E-09
HOPX	4q12	0.319291558	5.64E-10	7.66E-09
SPATS2	12q13.12	0.3192877	5.65E-10	7.66E-09
SYT6	1p13.2	0.319287226	5.65E-10	7.66E-09
ERP27	12p12.3	0.319282609	5.65E-10	7.66E-09
TMEM51-AS1	1p36.21	0.319232163	5.69E-10	7.70E-09
CLMP	11q24.1	0.319220602	5.70E-10	7.71E-09
KIF2C	1p34.1	0.319209145	5.70E-10	7.71E-09
ADGRE2	19p13.12	0.319071027	5.81E-10	7.84E-09
CDK1	10q21.2	0.319060847	5.82E-10	7.85E-09
DLGAP4	20q11.23	0.319016865	5.85E-10	7.89E-09
FFAR4	10q23.33	0.318893655	5.94E-10	8.01E-09
CRACR2B	11p15.5	0.318782038	6.03E-10	8.12E-09
LZTS2	10q24.31	0.31870179	6.09E-10	8.19E-09
ADGRL1	19p13.12	0.318615113	6.16E-10	8.27E-09
FXYD3	19q13.12	0.318613671	6.16E-10	8.27E-09
FHL3	1p34.3	0.318571388	6.20E-10	8.31E-09
TP53BP1	15q15.3	0.318517118	6.24E-10	8.37E-09
HPDL	1p34.1	0.318447751	6.30E-10	8.44E-09
TMEM43	3p25.1	0.318365368	6.37E-10	8.52E-09
PHC1	12p13.31	0.3183183	6.40E-10	8.57E-09
CNOT3	19q13.42	0.318277662	6.44E-10	8.61E-09
TMEM237	2q33.1	0.31810122	6.59E-10	8.79E-09
FFAR2	19q13.12	0.318066863	6.62E-10	8.83E-09
KIF11	10q23.33	0.317906002	6.76E-10	9.01E-09
MMP12	11q22.2	0.317859168	6.80E-10	9.06E-09
KHDRBS1	1p35.2	0.31784093	6.81E-10	9.07E-09
GJC1	17q21.31	0.317839021	6.81E-10	9.07E-09
BCL10	1p22.3	0.317580017	7.05E-10	9.37E-09
LOXL3	2p13.1	0.31756495	7.06E-10	9.38E-09
BUB1	2q13	0.317478016	7.14E-10	9.46E-09
ADAM9	8p11.22	0.317458725	7.16E-10	9.48E-09
FSCN1	7p22.1	0.317417058	7.20E-10	9.53E-09
MAP9	4q32.1	0.317337031	7.27E-10	9.62E-09
C4ORF46	4q32.1	0.317321893	7.29E-10	9.63E-09
HGF	7q21.11	0.317294264	7.31E-10	9.66E-09
GRIN2A	16p13.2	0.317288904	7.32E-10	9.66E-09
ACOT11	1p32.3	0.317222525	7.38E-10	9.74E-09
FAM118A	22q13.31	0.317157946	7.44E-10	9.81E-09
TMEM168	7q31.1	0.317139793	7.46E-10	9.82E-09
TMEM156	4p14	0.317094159	7.50E-10	9.87E-09
JRKL	11q21	0.31705543	7.54E-10	9.90E-09
HAUS6	9p22.1	0.316914482	7.68E-10	1.01E-08
CARD6	5p13.1	0.31691011	7.68E-10	1.01E-08
NOTCH1	9q34.3	0.316896478	7.70E-10	1.01E-08
ANKRD27	19q13.11	0.316866128	7.73E-10	1.01E-08
SSPN	12p12.1	0.31682392	7.77E-10	1.02E-08
BORA	13q21.33	0.316694573	7.90E-10	1.03E-08
BRSK1	19q13.42	0.316612674	7.99E-10	1.04E-08
ADAM22	7q21.12	0.316607063	7.99E-10	1.04E-08
PIFO	1p13.2	0.316523654	8.08E-10	1.05E-08
EEF1E1	6p24.3	0.316507329	8.09E-10	1.05E-08
PRPH2	6p21.1	0.316493928	8.11E-10	1.06E-08
ARHGAP28	18p11.31	0.316420174	8.19E-10	1.06E-08
CERKL	2q31.3	0.316370239	8.24E-10	1.07E-08
SLIT2	4p15.31	0.316310727	8.30E-10	1.08E-08
RAB42	1p35.3	0.316248916	8.37E-10	1.09E-08
PPM1M	3p21.2	0.316198427	8.42E-10	1.09E-08
PTHLH	12p11.22	0.316113145	8.52E-10	1.10E-08
ZNF215	11p15.4	0.316055843	8.58E-10	1.11E-08
VASH1	14q24.3	0.315988549	8.65E-10	1.12E-08
STX3	11q12.1	0.315963343	8.68E-10	1.12E-08
SH2D5	1p36.12	0.315821725	8.84E-10	1.14E-08
CENPL	1q25.1	0.315794381	8.87E-10	1.15E-08
FNBP4	11p11.2	0.315753208	8.92E-10	1.15E-08
SOCS7	17q12	0.315728774	8.95E-10	1.15E-08
NFATC4	14q12	0.315633094	9.06E-10	1.17E-08
BMPR1B	4q22.3	0.315624957	9.07E-10	1.17E-08
TBX19	1q24.2	0.315596828	9.10E-10	1.17E-08
SSTR3	22q13.1	0.315590634	9.11E-10	1.17E-08
MIS18BP1	14q21.2	0.315587826	9.11E-10	1.17E-08
SPECC1	17p11.2	0.31548175	9.24E-10	1.19E-08
DLX4	17q21.33	0.315448441	9.28E-10	1.19E-08
ACSS1	20p11.21	0.315442249	9.28E-10	1.19E-08
ORC6	16q11.2	0.315422722	9.31E-10	1.19E-08
INCENP	11q12.3	0.31533268	9.42E-10	1.21E-08
ZNF519	18p11.21	0.315280819	9.48E-10	1.21E-08
TTK	6q14.1	0.315203821	9.57E-10	1.22E-08
MYBL2	20q13.12	0.315175529	9.61E-10	1.23E-08
UBR5	8q22.3	0.315140292	9.65E-10	1.23E-08
THUMPD2	2p22.1	0.315128975	9.66E-10	1.23E-08
RASL11B	4q12	0.315004446	9.82E-10	1.25E-08
AP3M2	8p11.21	0.314991371	9.84E-10	1.25E-08
ARHGEF4	2q21.1	0.314794818	1.01E-09	1.28E-08
TRIM47	17q25.1	0.314754743	1.01E-09	1.29E-08
ZFC3H1	12q21.1	0.314749938	1.01E-09	1.29E-08
ARHGAP11A	15q13.3	0.314730309	1.02E-09	1.29E-08
MAP3K15	Xp22.12	0.314688805	1.02E-09	1.30E-08
GLI2	2q14.2	0.314667436	1.03E-09	1.30E-08
SCG2	2q36.1	0.314628537	1.03E-09	1.31E-08
PRPF39	14q21.2	0.31458861	1.04E-09	1.31E-08
CAPN9	1q42.2	0.314556536	1.04E-09	1.32E-08
COMMD8	4p12	0.314507828	1.05E-09	1.32E-08
NUP62	19q13.33	0.314439412	1.06E-09	1.33E-08
ZPLD1	3q12.3	0.314390027	1.06E-09	1.34E-08
FAP	2q24.2	0.314259957	1.08E-09	1.36E-08
CHML	1q43	0.314220789	1.09E-09	1.37E-08
TLDC2	20q11.23	0.314172949	1.09E-09	1.38E-08
COL5A1	9q34.3	0.314154945	1.09E-09	1.38E-08
IL21R	16p12.1	0.31414708	1.10E-09	1.38E-08
ZNF525	19q13.42	0.314135912	1.10E-09	1.38E-08
CENPF	1q41	0.314133597	1.10E-09	1.38E-08
CGAS	6q13	0.314074464	1.11E-09	1.39E-08
APCDD1	18p11.22	0.314072382	1.11E-09	1.39E-08
PLPP4	10q26.12	0.314061905	1.11E-09	1.39E-08
ELAPOR1	1p13.3	0.314013969	1.11E-09	1.40E-08
ZNF845	19q13.42	0.31400268	1.12E-09	1.40E-08
FBN2	5q23.3	0.313997464	1.12E-09	1.40E-08
PITX2	4q25	0.313992657	1.12E-09	1.40E-08
CDC25B	20p13	0.313951497	1.12E-09	1.40E-08
IGSF22	11p15.1	0.313714675	1.16E-09	1.45E-08
ZNF141	4p16.3	0.313636936	1.17E-09	1.46E-08
MMP9	20q13.12	0.313555917	1.18E-09	1.47E-08
FAM177B	1q41	0.313498751	1.19E-09	1.48E-08
TCN1	11q12.1	0.313309736	1.22E-09	1.52E-08
GNB1	1p36.33	0.313309516	1.22E-09	1.52E-08
HCG18	6p22.1	0.313303601	1.22E-09	1.52E-08
SFT2D1	6q27	0.313295627	1.22E-09	1.52E-08
EMB	5q11.1	0.313278652	1.22E-09	1.52E-08
CCT5	5p15.2	0.313211522	1.23E-09	1.53E-08
MDFI	6p21.1	0.313157589	1.24E-09	1.54E-08
TP53I11	11p11.2	0.313118414	1.25E-09	1.55E-08
GLIS2	16p13.3	0.313085235	1.25E-09	1.55E-08
TOX	8q12.1	0.313051686	1.26E-09	1.56E-08
TAF1B	2p25.1	0.312968613	1.27E-09	1.58E-08
DACT1	14q23.1	0.312953309	1.28E-09	1.58E-08
SINHCAF	12p11.21	0.31290905	1.28E-09	1.59E-08
RAVER1	19p13.2	0.312897476	1.29E-09	1.59E-08
HSPA14	10p13	0.31280606	1.30E-09	1.60E-08
UGT8	4q26	0.312778186	1.30E-09	1.61E-08
LIMA1	12q13.12	0.312731323	1.31E-09	1.62E-08
TMEM164	Xq23	0.312659305	1.32E-09	1.63E-08
PRXL2B	1p36.32	0.312601177	1.33E-09	1.64E-08
GDF10	10q11.22	0.312531135	1.35E-09	1.65E-08
ZDBF2	2q33.3	0.312441792	1.36E-09	1.67E-08
RALGAPB	20q11.23	0.312242893	1.40E-09	1.71E-08
TNFAIP6	2q23.3	0.312237527	1.40E-09	1.71E-08
LGALS3	14q22.3	0.312189909	1.41E-09	1.72E-08
LAT2	7q11.23	0.312096435	1.42E-09	1.74E-08
IL1B	2q14.1	0.312040103	1.43E-09	1.75E-08
SLC6A8	Xq28	0.311991348	1.44E-09	1.76E-08
LBH	2p23.1	0.311939135	1.45E-09	1.77E-08
DCHS2	4q31.3	0.311816631	1.47E-09	1.80E-08
RBM25	14q24.2	0.311784813	1.48E-09	1.80E-08
EPRS1	1q41	0.311760122	1.48E-09	1.81E-08
RHNO1	12p13.33	0.311754206	1.49E-09	1.81E-08
MRC2	17q23.2	0.311708681	1.49E-09	1.82E-08
MRE11	11q21	0.311665471	1.50E-09	1.82E-08
DDN	12q13.12	0.311647521	1.51E-09	1.83E-08
TEAD4	12p13.33	0.311592939	1.52E-09	1.84E-08
KHDC1	6q13	0.311587106	1.52E-09	1.84E-08
B3GNT7	2q37.1	0.311580851	1.52E-09	1.84E-08
HAVCR1	5q33.3	0.311373926	1.56E-09	1.89E-08
PIK3CD	1p36.22	0.311306306	1.57E-09	1.90E-08
GPR55	2q37.1	0.31127709	1.58E-09	1.91E-08
RBM12	20q11.22	0.311266291	1.58E-09	1.91E-08
TBC1D22B	6p21.2	0.311239027	1.59E-09	1.91E-08
SLC25A24	1p13.3	0.311095765	1.62E-09	1.95E-08
NT5DC2	3p21.1	0.311066958	1.62E-09	1.95E-08
CDK2AP1	12q24.31	0.311041752	1.63E-09	1.96E-08
LRRC8C	1p22.2	0.311035579	1.63E-09	1.96E-08
EDNRA	4q31.22-q31.23	0.311028892	1.63E-09	1.96E-08
CD2AP	6p12.3	0.310962296	1.64E-09	1.97E-08
ACTL6A	3q26.33	0.310824158	1.67E-09	2.01E-08
YWHAB	20q13.12	0.310775032	1.68E-09	2.02E-08
ZBTB1	14q23.3	0.310748025	1.69E-09	2.02E-08
WDHD1	14q22.2-q22.3	0.310652108	1.71E-09	2.04E-08
SLC52A2	8q24.3	0.310551265	1.73E-09	2.07E-08
ZNF765	19q13.42	0.310478733	1.75E-09	2.08E-08
FGFR1	8p11.23	0.310435266	1.76E-09	2.09E-08
NOVA1	14q12	0.310410786	1.76E-09	2.10E-08
LINC02591	1q21.1	0.31040363	1.76E-09	2.10E-08
IL4I1	19q13.33	0.310397457	1.76E-09	2.10E-08
RAC2	22q13.1	0.310383053	1.77E-09	2.10E-08
FBH1	10p15.1	0.310365049	1.77E-09	2.10E-08
LMNB1	5q23.2	0.310334185	1.78E-09	2.11E-08
UTRN	6q24.2	0.310326211	1.78E-09	2.11E-08
VGLL4	3p25.3-p25.2	0.310152856	1.82E-09	2.16E-08
SCRN1	7p14.3	0.310116848	1.83E-09	2.17E-08
IPW	15q11.2	0.309943492	1.87E-09	2.21E-08
FMN1	15q13.3	0.309930282	1.87E-09	2.21E-08
INTS6L	Xq26.3	0.309925488	1.87E-09	2.21E-08
PHLDA2	11p15.4	0.309907227	1.88E-09	2.21E-08
GCNT3	15q22.2	0.309898289	1.88E-09	2.22E-08
NCR3LG1	11p15.1	0.309879139	1.88E-09	2.22E-08
MGAM2	7q34	0.309811575	1.90E-09	2.24E-08
DCLK1	13q13.3	0.309795173	1.90E-09	2.24E-08
MYO1G	7p13	0.3096117	1.95E-09	2.29E-08
MOB3A	19p13.3	0.309608356	1.95E-09	2.29E-08
IER3	6p21.33	0.309520135	1.97E-09	2.31E-08
MTA3	2p21	0.309479754	1.98E-09	2.32E-08
ARMCX3	Xq22.1	0.309440402	1.99E-09	2.33E-08
DNAAF4	15q21.3	0.309279138	2.03E-09	2.37E-08
B4GALNT4	11p15.5	0.309154096	2.06E-09	2.41E-08
IKBIP	12q23.1	0.309144618	2.06E-09	2.41E-08
PMEPA1	20q13.31	0.309112982	2.07E-09	2.42E-08
NFKBID	19q13.12	0.30900187	2.10E-09	2.45E-08
LRRK1	15q26.3	0.308985409	2.11E-09	2.45E-08
TIMP2	17q25.3	0.308968839	2.11E-09	2.45E-08
SNHG1	11q12.3	0.308959688	2.11E-09	2.46E-08
ZFP82	19q13.12	0.308939775	2.12E-09	2.46E-08
TAF4B	18q11.2	0.308855903	2.14E-09	2.48E-08
ADGRG5	16q21	0.30879129	2.16E-09	2.50E-08
LETM2	8p11.23	0.30878753	2.16E-09	2.50E-08
DDX39A	19p13.12	0.308714573	2.18E-09	2.52E-08
RGS1	1q31.2	0.308576198	2.22E-09	2.57E-08
AJM1	9q34.3	0.308471507	2.25E-09	2.60E-08
TLL2	10q24.1	0.308408213	2.26E-09	2.62E-08
AP1S3	2q36.1	0.308332626	2.29E-09	2.64E-08
GAS2L3	12q23.1	0.30825013	2.31E-09	2.66E-08
CSF2RA	Xp22.32 and Yp11.3	0.308220248	2.32E-09	2.67E-08
GLIPR2	9p13.3	0.308098056	2.35E-09	2.71E-08
TESMIN	11q13.3	0.308076966	2.36E-09	2.72E-08
ZNF169	9q22.32	0.307937304	2.40E-09	2.76E-08
DFFB	1p36.32	0.307908537	2.41E-09	2.77E-08
ZNF391	6p22.1	0.307895543	2.41E-09	2.77E-08
MMP11	22q11.23	0.307830307	2.43E-09	2.79E-08
PYCR1	17q25.3	0.307780153	2.45E-09	2.81E-08
CARD11	7p22.2	0.307688074	2.48E-09	2.84E-08
CYP2S1	19q13.2	0.307679072	2.48E-09	2.84E-08
ZNF204P	6p22.1	0.307613089	2.50E-09	2.86E-08
RAB39A	11q22.3	0.307589288	2.51E-09	2.87E-08
CLIP3	19q13.12	0.307556128	2.52E-09	2.88E-08
DUSP11	2p13.1	0.307530408	2.53E-09	2.88E-08
GLIS1	1p32.3	0.307484895	2.54E-09	2.89E-08
DUSP26	8p12	0.307478237	2.54E-09	2.90E-08
GLRB	4q32.1	0.307436303	2.56E-09	2.91E-08
CAPRIN1	11p13	0.307393061	2.57E-09	2.92E-08
FRMD5	15q15.3	0.307371764	2.58E-09	2.93E-08
FKBP9	7p14.3	0.307349594	2.58E-09	2.94E-08
ANK3	10q21.2	0.307338534	2.59E-09	2.94E-08
RIMBP3	22q11.21	0.307300893	2.60E-09	2.95E-08
PPP1CC	12q24.11	0.307296095	2.60E-09	2.95E-08
GNL3L	Xp11.22	0.307293781	2.60E-09	2.95E-08
RFLNA	12q24.31	0.307280843	2.61E-09	2.95E-08
ELAPOR2	7q21.12	0.307266814	2.61E-09	2.96E-08
TPM3	1q21.3	0.307206074	2.63E-09	2.98E-08
TET1	10q21.3	0.307102935	2.66E-09	3.01E-08
SH3GLB1	1p22.3	0.307091361	2.67E-09	3.01E-08
EFR3B	2p23.3	0.307078135	2.67E-09	3.01E-08
CHRNA5	15q25.1	0.307044426	2.68E-09	3.03E-08
ZNF287	17p11.2	0.307020729	2.69E-09	3.03E-08
DNAAF9	20p13	0.306950671	2.72E-09	3.06E-08
SLFN13	17q12	0.30686888	2.74E-09	3.09E-08
MEIS3	19q13.32	0.306859146	2.75E-09	3.09E-08
RPRD1A	18q12.2	0.306817697	2.76E-09	3.10E-08
GRPEL2	5q32	0.306790947	2.77E-09	3.11E-08
GEM	8q22.1	0.306771914	2.78E-09	3.12E-08
MARK1	1q41	0.306748726	2.78E-09	3.12E-08
SYTL2	11q14.1	0.306739764	2.79E-09	3.12E-08
DYNC2H1	11q22.3	0.306595353	2.84E-09	3.18E-08
LFNG	7p22.3	0.306581841	2.84E-09	3.18E-08
OLFML3	1p13.2	0.306552005	2.85E-09	3.19E-08
PRSS22	16p13.3	0.306533692	2.86E-09	3.20E-08
PRR19	19q13.2	0.306516511	2.87E-09	3.20E-08
PSORS1C1	6p21.33	0.306456035	2.89E-09	3.22E-08
SPIB	19q13.33	0.306422374	2.90E-09	3.23E-08
IFT52	20q13.12	0.306273454	2.95E-09	3.29E-08
ZNF883	9q32	0.306203876	2.98E-09	3.32E-08
CNFN	19q13.2	0.306200325	2.98E-09	3.32E-08
RSPH1	21q22.3	0.306185063	2.99E-09	3.32E-08
GFI1	1p22.1	0.306130983	3.01E-09	3.34E-08
TMEM121B	22q11.1	0.306103016	3.02E-09	3.35E-08
ZNF879	5q35.3	0.306092531	3.02E-09	3.36E-08
HNRNPL	19q13.2	0.306069234	3.03E-09	3.36E-08
SRRM3	7q11.23	0.306044331	3.04E-09	3.37E-08
KIF14	1q32.1	0.306025252	3.05E-09	3.38E-08
SRSF3	6p21.31-p21.2	0.305933173	3.08E-09	3.41E-08
AFAP1L1	5q32	0.305921619	3.09E-09	3.42E-08
PPHLN1	12q12	0.305854726	3.11E-09	3.44E-08
ZNF283	19q13.31	0.305851897	3.11E-09	3.44E-08
CFAP300	11q22.1	0.305849664	3.11E-09	3.44E-08
NCOA5	20q13.12	0.305682657	3.18E-09	3.51E-08
PLK4	4q28.1	0.305631988	3.20E-09	3.52E-08
DCTN5	16p12.2	0.305630959	3.20E-09	3.52E-08
KIF18A	11p14.1	0.305586977	3.22E-09	3.54E-08
NPTX2	7q22.1	0.30554871	3.23E-09	3.56E-08
LGALS9	17q11.2	0.305541709	3.23E-09	3.56E-08
STK17A	7p13	0.30551316	3.25E-09	3.57E-08
EREG	4q13.3	0.305500281	3.25E-09	3.57E-08
CORO6	17q11.2	0.305420972	3.28E-09	3.60E-08
CHSY1	15q26.3	0.305369274	3.30E-09	3.63E-08
ITGB1	10p11.22	0.305356266	3.31E-09	3.63E-08
KLHL30	2q37.3	0.305248183	3.35E-09	3.68E-08
EPB41L3	18p11.31	0.305241038	3.36E-09	3.68E-08
PLCE1	10q23.33	0.305221491	3.37E-09	3.68E-08
MAL2	8q24.12	0.305184196	3.38E-09	3.70E-08
ANXA5	4q27	0.305123239	3.41E-09	3.72E-08
FXYD2	11q23.3	0.30511828	3.41E-09	3.72E-08
CHST6	16q23.1	0.304910678	3.50E-09	3.81E-08
BICC1	10q21.1	0.304910312	3.50E-09	3.81E-08
ZNF678	1q42.13	0.304817592	3.54E-09	3.86E-08
MYOF	10q23.33	0.304812023	3.54E-09	3.86E-08
LAMP3	3q27.1	0.304736405	3.57E-09	3.89E-08
SYNGAP1	6p21.32	0.304732181	3.57E-09	3.89E-08
ARHGAP4	Xq28	0.304715314	3.58E-09	3.90E-08
PTP4A2	1p35.2	0.304685479	3.60E-09	3.91E-08
MOB4	2q33.1	0.304655643	3.61E-09	3.92E-08
CAPG	2p11.2	0.304636867	3.62E-09	3.93E-08
TOP2A	17q21.2	0.304427503	3.71E-09	4.03E-08
ZNF664	12q24.31	0.304351885	3.75E-09	4.06E-08
MBOAT4	8p12	0.304328515	3.76E-09	4.07E-08
PRNP	20p13	0.304250804	3.79E-09	4.11E-08
ECEL1	2q37.1	0.304245608	3.80E-09	4.11E-08
HOMER1	5q14.1	0.30423261	3.80E-09	4.11E-08
BTBD3	20p12.2	0.304155896	3.84E-09	4.15E-08
DHX15	4p15.2	0.304130176	3.85E-09	4.16E-08
ADD3	10q25.1-q25.2	0.304069476	3.88E-09	4.18E-08
CCDC89	11q14.1	0.304041822	3.89E-09	4.20E-08
FAR1	11p15.3	0.304033725	3.90E-09	4.20E-08
IGSF3	1p13.1	0.304030895	3.90E-09	4.20E-08
JAK3	19p13.11	0.303990514	3.92E-09	4.22E-08
RAB11A	15q22.31	0.303935473	3.94E-09	4.24E-08
INPPL1	11q13.4	0.303907952	3.96E-09	4.25E-08
ZNF100	19p13.1	0.303864485	3.98E-09	4.28E-08
GDF1	19p13.11	0.303812833	4.00E-09	4.30E-08
CTBP2	10q26.13	0.303714535	4.05E-09	4.35E-08
PLTP	20q13.12	0.303633516	4.09E-09	4.38E-08
LINC01096	4p15.33	0.303620407	4.10E-09	4.39E-08
RHOH	4p14	0.303561004	4.13E-09	4.42E-08
TARS1	5p13.3	0.303559441	4.13E-09	4.42E-08
ESRP1	8q22.1	0.303555779	4.13E-09	4.42E-08
TGFB3	14q24.3	0.303539894	4.14E-09	4.42E-08
KCND2	7q31.31	0.303480103	4.17E-09	4.45E-08
ARHGEF17	11q13.4	0.303468905	4.18E-09	4.46E-08
GNPDA1	5q31.3	0.303467362	4.18E-09	4.46E-08
ARPC2	2q35	0.303456817	4.18E-09	4.46E-08
STK24	13q32.2	0.303431096	4.20E-09	4.47E-08
DVL3	3q27.1	0.303426724	4.20E-09	4.47E-08
GPR85	7q31.1	0.303408786	4.21E-09	4.48E-08
PRDM15	21q22.3	0.30340409	4.21E-09	4.48E-08
A4GNT	3q22.3	0.303361687	4.23E-09	4.50E-08
ATP7A	Xq21.1	0.303323585	4.25E-09	4.52E-08
TXLNB	6q24.1	0.303319108	4.25E-09	4.52E-08
PLA2G10	16p13.12	0.303297895	4.26E-09	4.52E-08
MITF	3p13	0.303283204	4.27E-09	4.53E-08
HNRNPU	1q44	0.303264943	4.28E-09	4.53E-08
KCNK13	14q32.11	0.303207868	4.31E-09	4.56E-08
RGS10	10q26.11	0.303104191	4.37E-09	4.61E-08
IL27RA	19p13.12	0.303090302	4.37E-09	4.62E-08
METTL4	18p11.32	0.303050949	4.40E-09	4.64E-08
PDE1A	2q32.1	0.303023818	4.41E-09	4.65E-08
CD207	2p13.3	0.30301507	4.42E-09	4.65E-08
PCSK1N	Xp11.23	0.302980864	4.43E-09	4.67E-08
PWWP2A	5q33.3	0.30292209	4.47E-09	4.70E-08
ADM2	22q13.33	0.302887368	4.48E-09	4.72E-08
SOCS5	2p21	0.302841586	4.51E-09	4.74E-08
CDC20	1p34.2	0.302812155	4.53E-09	4.75E-08
APOBEC3D	22q13.1	0.3027593	4.56E-09	4.78E-08
RASSF2	20p13	0.302753622	4.56E-09	4.78E-08
MSC	8q13.3	0.302750021	4.56E-09	4.78E-08
TEX10	9q31.1	0.302659486	4.61E-09	4.83E-08
DCLRE1B	1p13.2	0.302585045	4.65E-09	4.86E-08
DHDH	19q13.33	0.302566713	4.66E-09	4.87E-08
RFWD3	16q23.1	0.302545802	4.68E-09	4.88E-08
COL3A1	2q32.2	0.302536542	4.68E-09	4.88E-08
JPT1	17q25.1	0.302478414	4.72E-09	4.92E-08
GDAP1	8q21.11	0.302424144	4.75E-09	4.95E-08
ZSWIM4	19p13.13	0.302412204	4.75E-09	4.95E-08
SKIL	3q26.2	0.302386483	4.77E-09	4.96E-08
PDCL3	2q11.2	0.302375276	4.77E-09	4.97E-08
PDZD7	10q24.31	0.302359622	4.78E-09	4.97E-08
SPATA12	3p14.3	0.302248142	4.85E-09	5.04E-08
PLEKHH1	14q24.1	0.302230727	4.86E-09	5.04E-08
MS4A8	11q12.2	0.30213527	4.92E-09	5.10E-08
ZNF321P	19q13.41	0.302079323	4.95E-09	5.13E-08
HDAC2	6q21	0.301992557	5.00E-09	5.18E-08
DRAXIN	1p36.22	0.301989237	5.01E-09	5.18E-08
HAUS3	4p16.3	0.301912823	5.05E-09	5.23E-08
TIMP1	Xp11.3	0.301893276	5.06E-09	5.24E-08
NUFIP2	17q11.2	0.30185701	5.09E-09	5.26E-08
MCAM	11q23.3	0.301852895	5.09E-09	5.26E-08
LSAMP	3q13.31	0.301757428	5.15E-09	5.32E-08
PRR12	19q13.33	0.301750014	5.15E-09	5.32E-08
LIMD2	17q23.3	0.3016924	5.19E-09	5.35E-08
COL6A3	2q37.3	0.30166205	5.21E-09	5.36E-08
DBR1	3q22.3	0.301658449	5.21E-09	5.36E-08
CARD9	9q34.3	0.301652533	5.22E-09	5.37E-08
DCAF16	4p15.31	0.301602121	5.25E-09	5.40E-08
HENMT1	1p13.3	0.301540907	5.29E-09	5.43E-08
U2SURP	3q23	0.301470176	5.33E-09	5.48E-08
IQCA1	2q37.2-q37.3	0.301457234	5.34E-09	5.48E-08
PRSS12	4q26	0.301446019	5.35E-09	5.49E-08
KPNA2	17q24.2	0.30141925	5.37E-09	5.50E-08
TWSG1	18p11.22	0.301391472	5.38E-09	5.52E-08
ZNF202	11q23.3	0.301279588	5.46E-09	5.59E-08
SPTB	14q23.3	0.301264927	5.47E-09	5.60E-08
CDCA2	8p21.2	0.301203713	5.51E-09	5.63E-08
FAM227A	22q13.1	0.301196216	5.51E-09	5.64E-08
RTN1	14q23.1	0.301148176	5.55E-09	5.67E-08
LGI2	4p15.2	0.30098509	5.66E-09	5.78E-08
PAQR8	6p12.2	0.300947024	5.68E-09	5.79E-08
ZSCAN20	1p35.1	0.300944985	5.68E-09	5.79E-08
CNTN1	12q12	0.300944856	5.68E-09	5.79E-08
GATA3	10p14	0.300941321	5.69E-09	5.79E-08
FABP5	8q21.13	0.300929277	5.70E-09	5.80E-08
RABL6	9q34.3	0.300924133	5.70E-09	5.80E-08
GPR27	3p13	0.300918266	5.70E-09	5.80E-08
KCNK3	2p23.3	0.300754617	5.82E-09	5.91E-08
IGF1R	15q26.3	0.300749234	5.82E-09	5.91E-08
MED12L	3q25.1	0.30070202	5.86E-09	5.94E-08
ARHGAP11B	15q13.2	0.300658409	5.89E-09	5.97E-08
HPCAL4	1p34.2	0.300619776	5.91E-09	6.00E-08
ART5	11p15.4	0.300535112	5.98E-09	6.06E-08
KPNA4	3q25.33	0.300431864	6.05E-09	6.13E-08
STXBP1	9q34.11	0.300269549	6.17E-09	6.24E-08
SFMBT2	10p14	0.300178618	6.24E-09	6.30E-08
ADAMTS5	21q21.3	0.30012603	6.28E-09	6.34E-08
HS6ST2	Xq26.2	0.300115785	6.29E-09	6.35E-08
VRK2	2p16.1	0.300098252	6.30E-09	6.36E-08
TRPV5	7q34	0.300048085	6.34E-09	6.39E-08
SLC6A19	5p15.33	0.300036891	6.35E-09	6.40E-08
KISS1R	19p13.3	0.29993465	6.43E-09	6.47E-08
MCOLN2	1p22.3	0.299892713	6.46E-09	6.50E-08
FCHSD1	5q31.3	0.299870884	6.48E-09	6.51E-08
CDH10	5p14.2-p14.1	0.299860858	6.48E-09	6.52E-08
ZNF124	1q44	0.299790893	6.54E-09	6.57E-08
ABCB9	12q24.31	0.299785235	6.54E-09	6.57E-08
RGS17	6q25.2	0.299768188	6.56E-09	6.58E-08
TMEM158	3p21.31	0.299697773	6.61E-09	6.63E-08
MTCL1	18p11.22	0.299692642	6.62E-09	6.63E-08
ENTPD3	3p22.1	0.299641796	6.66E-09	6.66E-08
NRGN	11q24.2	0.299628598	6.67E-09	6.67E-08
LPAR5	12p13.31	0.299580244	6.71E-09	6.70E-08
BCL2A1	15q25.1	0.299341064	6.91E-09	6.89E-08
TWIST1	7p21.1	0.299214871	7.01E-09	6.99E-08
ZNF292	6q14.3	0.2992127	7.01E-09	6.99E-08
LPAR3	1p22.3	0.299206633	7.02E-09	6.99E-08
NRG3	10q23.1	0.299198553	7.03E-09	7.00E-08
KMT5A	12q24.31	0.299186465	7.04E-09	7.00E-08
KREMEN2	16p13.3	0.299062833	7.14E-09	7.10E-08
RCN2	15q24.3	0.299011052	7.19E-09	7.14E-08
NAT8L	4p16.3	0.298979035	7.21E-09	7.16E-08
CCT6A	7p11.2	0.298944951	7.24E-09	7.18E-08
PHTF2	7q11.23-q21.11	0.298924889	7.26E-09	7.20E-08
XPOT	12q14.2	0.298907142	7.28E-09	7.21E-08
CIT	12q24.23	0.2988503	7.33E-09	7.26E-08
TNPO1	5q13.2	0.298780598	7.39E-09	7.31E-08
SMG9	19q13.31	0.298768509	7.40E-09	7.32E-08
NOD1	7p14.3	0.298763622	7.40E-09	7.32E-08
GALNT5	2q24.1	0.298659182	7.50E-09	7.41E-08
SRC	20q11.23	0.298578436	7.57E-09	7.48E-08
ARHGAP17	16p12.1	0.298556316	7.59E-09	7.49E-08
LINC00092	9q22.32	0.298336805	7.79E-09	7.68E-08
JHY	11q24.1	0.29833467	7.80E-09	7.68E-08
FANCD2	3p25.3	0.298251015	7.88E-09	7.75E-08
RADIL	7p22.1	0.298207432	7.92E-09	7.79E-08
MMP1	11q22.2	0.298113907	8.01E-09	7.87E-08
EPCAM	2p21	0.298084392	8.03E-09	7.89E-08
TNC	9q33.1	0.298043709	8.07E-09	7.91E-08
HNRNPA0	5q31.2	0.298017732	8.10E-09	7.94E-08
CHST12	7p22.3	0.297978894	8.14E-09	7.97E-08
RAB34	17q11.2	0.297943914	8.17E-09	8.00E-08
STMN3	20q13.33	0.297892621	8.22E-09	8.04E-08
KPNB1	17q21.32	0.297877813	8.24E-09	8.05E-08
SYT5	19q13.42	0.297865222	8.25E-09	8.06E-08
GAD1	2q31.1	0.297816408	8.30E-09	8.10E-08
PPP1R9A	7q21.3	0.297661009	8.45E-09	8.24E-08
NETO2	16q12.1	0.297654303	8.46E-09	8.24E-08
GALNT6	12q13.13	0.297644015	8.47E-09	8.25E-08
MECOM	3q26.2	0.297641957	8.47E-09	8.25E-08
TEX15	8p12	0.297608899	8.51E-09	8.28E-08
DUBR	3q13.12	0.297588092	8.53E-09	8.29E-08
CEP290	12q21.32	0.297504096	8.62E-09	8.37E-08
RNF44	5q35.2	0.297388869	8.74E-09	8.48E-08
POU2AF2	11q23.1	0.297350278	8.78E-09	8.51E-08
COLGALT1	19p13.11	0.297268755	8.86E-09	8.59E-08
SLC6A15	12q21.31	0.297255626	8.88E-09	8.60E-08
CUBN	10p13	0.297226078	8.91E-09	8.63E-08
LINC00654	20p12.3	0.297174221	8.96E-09	8.68E-08
ULBP2	6q25.1	0.29712586	9.01E-09	8.72E-08
KDM5B	1q32.1	0.297085883	9.06E-09	8.75E-08
KNTC1	12q24.31	0.29699046	9.16E-09	8.85E-08
MGAM	7q34	0.296940496	9.22E-09	8.89E-08
CILP2	19p13.11	0.296915164	9.25E-09	8.91E-08
CSF3R	1p34.3	0.296893752	9.27E-09	8.93E-08
DUSP7	3p21.2	0.296842568	9.33E-09	8.98E-08
ANTXR1	2p13.3	0.296827908	9.34E-09	8.99E-08
CTXN1	19p13.2	0.296753996	9.43E-09	9.07E-08
PHETA1	12q24.12	0.296660982	9.53E-09	9.16E-08
FAXC	6q16.2	0.296597665	9.60E-09	9.23E-08
NDRG3	20q11.23	0.296590766	9.61E-09	9.23E-08
CERS6	2q24.3	0.296580735	9.62E-09	9.24E-08
PODXL2	3q21.3	0.296546479	9.66E-09	9.27E-08
PIWIL4	11q21	0.296497525	9.72E-09	9.32E-08
IFT80	3q25.33	0.296383974	9.85E-09	9.44E-08
TLE3	15q23	0.296346937	9.90E-09	9.47E-08
PRPF38B	1p13.3	0.296146061	1.01E-08	9.69E-08
SLC35F3	1q42.2	0.296015876	1.03E-08	9.83E-08
CST2	20p11.21	0.295905309	1.04E-08	9.96E-08
PRR11	17q22	0.295813087	1.05E-08	1.01E-07
PPP6R3	11q13	0.295750482	1.06E-08	1.01E-07
NPHP4	1p36.31	0.295714473	1.07E-08	1.02E-07
FNDC1	6q25.3	0.295709306	1.07E-08	1.02E-07
SOX12	20p13	0.295624709	1.08E-08	1.03E-07
KIF18B	17q21.31	0.295603876	1.08E-08	1.03E-07
FIGN	2q24.3	0.295395345	1.11E-08	1.05E-07
ARHGAP26	5q31.3	0.295350935	1.11E-08	1.06E-07
PYGO1	15q21.3	0.295348069	1.11E-08	1.06E-07
CDCA8	1p34.3	0.295335869	1.12E-08	1.06E-07
ZNF660	3p21.31	0.295297186	1.12E-08	1.06E-07
COL10A1	6q22.1	0.295296329	1.12E-08	1.06E-07
DUOXA2	15q21.1	0.295294858	1.12E-08	1.06E-07
SLITRK4	Xq27.3	0.29521234	1.13E-08	1.07E-07
SLC8A1	2p22.1	0.295202142	1.13E-08	1.07E-07
RFX3	9p24.2	0.295165143	1.14E-08	1.08E-07
ADORA2B	17p12	0.295143047	1.14E-08	1.08E-07
SLC24A3	20p11.23	0.295121157	1.15E-08	1.08E-07
CBARP	19p13.3	0.295063222	1.15E-08	1.09E-07
FAM124A	13q14.3	0.295016234	1.16E-08	1.10E-07
SPTSSB	3q26.1	0.29491847	1.17E-08	1.11E-07
KCNC4	1p13.3	0.29490351	1.18E-08	1.11E-07
EPB41L1	20q11.23	0.294858242	1.18E-08	1.11E-07
SHISAL2A	1p32.3	0.294856962	1.18E-08	1.11E-07
MARCHF1	4q32.2-q32.3	0.294798761	1.19E-08	1.12E-07
LRRC37A4P	17q21.31	0.294764363	1.19E-08	1.13E-07
ARHGEF38	4q24	0.294752825	1.20E-08	1.13E-07
USP48	1p36.12	0.294700062	1.20E-08	1.13E-07
CDC42BPG	11q13.1	0.29468387	1.21E-08	1.13E-07
ZNF737	19p12	0.294555256	1.22E-08	1.15E-07
GPRIN2	10q11.22	0.294513957	1.23E-08	1.16E-07
BCL9	1q21.2	0.294458033	1.24E-08	1.16E-07
GSKIP	14q32.2	0.294434113	1.24E-08	1.17E-07
PTGDS	9q34.3	0.294429998	1.24E-08	1.17E-07
LAMC2	1q25.3	0.294423515	1.24E-08	1.17E-07
AXL	19q13.2	0.294406335	1.25E-08	1.17E-07
SERAC1	6q25.3	0.294393218	1.25E-08	1.17E-07
TBC1D31	8q24.13	0.294385502	1.25E-08	1.17E-07
ZNF160	19q13.42	0.294357724	1.25E-08	1.17E-07
SOCS4	14q22.3	0.294338691	1.26E-08	1.17E-07
FERMT3	11q13.1	0.294250984	1.27E-08	1.19E-07
FAM222B	17q11.2	0.294232723	1.27E-08	1.19E-07
HOXA1	7p15.2	0.294223864	1.27E-08	1.19E-07
ZIC5	13q32.3	0.294191544	1.28E-08	1.19E-07
KCNE4	2q36.1	0.294153247	1.28E-08	1.20E-07
BNIP5	6p21.31	0.294041734	1.30E-08	1.21E-07
CD276	15q24.1	0.293986322	1.31E-08	1.22E-07
NUP188	9q34.11	0.293913276	1.32E-08	1.23E-07
U2AF2	19q13.42	0.293893729	1.32E-08	1.23E-07
TNNT1	19q13.42	0.293890408	1.33E-08	1.23E-07
WNT7B	22q13.31	0.293875082	1.33E-08	1.23E-07
ADAP1	7p22.3	0.293770014	1.34E-08	1.25E-07
CALU	7q32.1	0.293748666	1.35E-08	1.25E-07
EN2	7q36.3	0.293737693	1.35E-08	1.25E-07
KIF26B	1q44	0.293706932	1.35E-08	1.26E-07
RAB39B	Xq28	0.293589827	1.37E-08	1.27E-07
SLAMF8	1q23.2	0.293519497	1.38E-08	1.28E-07
ZNF365	10q21.2	0.293413051	1.40E-08	1.30E-07
PTMA	2q37.1	0.293224485	1.43E-08	1.33E-07
MAP3K6	1p36.11	0.29321111	1.44E-08	1.33E-07
ZBTB34	9q33.3	0.293206738	1.44E-08	1.33E-07
TFDP1	13q34	0.293064761	1.46E-08	1.35E-07
FAM131C	1p36.13	0.293053789	1.46E-08	1.35E-07
PRDM8	4q21.21	0.293047608	1.46E-08	1.35E-07
HNRNPH1	5q35.3	0.293040327	1.47E-08	1.35E-07
SLCO5A1	8q13.3	0.293032746	1.47E-08	1.35E-07
ATP10D	4p12	0.292921499	1.49E-08	1.37E-07
PLEKHS1	10q25.3	0.292869725	1.50E-08	1.38E-07
PLCL1	2q33.1	0.292848967	1.50E-08	1.38E-07
PTPN13	4q21.3	0.292846731	1.50E-08	1.38E-07
GNB3	12p13.31	0.29284495	1.50E-08	1.38E-07
GPR63	6q16.1	0.292813083	1.51E-08	1.38E-07
HRH1	3p25.3	0.292773368	1.51E-08	1.39E-07
SPINK1	5q32	0.292731333	1.52E-08	1.40E-07
ST6GALNAC5	1p31.1	0.292725484	1.52E-08	1.40E-07
EMP3	19q13.33	0.292704676	1.52E-08	1.40E-07
ROR2	9q22.31	0.292678209	1.53E-08	1.40E-07
C2ORF50	2p25.1	0.292631963	1.54E-08	1.41E-07
PNRC2	1p36.11	0.292608482	1.54E-08	1.41E-07
DGKZ	11p11.2	0.292471393	1.57E-08	1.43E-07
RBM12B	8q22.1	0.29243847	1.57E-08	1.44E-07
BAZ1A	14q13.1-q13.2	0.292396546	1.58E-08	1.44E-07
TLR7	Xp22.2	0.292395517	1.58E-08	1.44E-07
FEZ1	11q24.2	0.2923806	1.58E-08	1.45E-07
DEPDC1	1p31.3	0.292373655	1.59E-08	1.45E-07
MXRA8	1p36.33	0.292357709	1.59E-08	1.45E-07
RORB	9q21.13	0.292337916	1.59E-08	1.45E-07
FOXJ3	1p34.2	0.292313984	1.60E-08	1.45E-07
GABBR1	6p22.1	0.292283891	1.60E-08	1.46E-07
ZNF702P	19q13.41	0.292269654	1.60E-08	1.46E-07
DGKG	3q27.2-q27.3	0.292261919	1.61E-08	1.46E-07
ZNF816	19q13.41	0.292122	1.63E-08	1.48E-07
EPHA10	1p34.3	0.292117531	1.63E-08	1.48E-07
BTN2A1	6p22.2	0.292112593	1.63E-08	1.48E-07
PAPOLA	14q32.2	0.292088674	1.64E-08	1.49E-07
MAPKBP1	15q15.1	0.291957776	1.66E-08	1.51E-07
CCDC8	19q13.32	0.291890906	1.68E-08	1.52E-07
KIF5C	2q23.1-q23.2	0.291853222	1.69E-08	1.53E-07
ANO4	12q23.1	0.291850436	1.69E-08	1.53E-07
SLC15A2	3q13.33	0.291828935	1.69E-08	1.53E-07
XRCC2	7q36.1	0.291785232	1.70E-08	1.54E-07
FOXD1	5q13.2	0.291642691	1.73E-08	1.56E-07
DPF1	19q13.2	0.291608937	1.73E-08	1.57E-07
TRAK1	3p22.1	0.291604359	1.74E-08	1.57E-07
PRMT3	11p15.1	0.291590103	1.74E-08	1.57E-07
STAC	3p22.3-p22.2	0.291382136	1.78E-08	1.60E-07
DSG2	18q12.1	0.291255591	1.81E-08	1.63E-07
SLC9A9	3q24	0.291188461	1.82E-08	1.64E-07
CDCA7L	7p15.3	0.291086608	1.84E-08	1.66E-07
FAM72B	1p11.2	0.290914025	1.88E-08	1.69E-07
P2RX4	12q24.31	0.290891648	1.89E-08	1.69E-07
VPS8	3q27.2	0.290828119	1.90E-08	1.71E-07
NEFM	8p21.2	0.290817333	1.90E-08	1.71E-07
GPSM2	1p13.3	0.290774877	1.91E-08	1.71E-07
LINC01600	6p25.2	0.290759097	1.92E-08	1.72E-07
ITPRIPL2	16p12.3	0.290756359	1.92E-08	1.72E-07
CASP5	11q22.3	0.290748636	1.92E-08	1.72E-07
RAD21	8q24.11	0.290739126	1.92E-08	1.72E-07
PKNOX2	11q24.2	0.290680205	1.93E-08	1.73E-07
KLF5	13q22.1	0.290668909	1.94E-08	1.73E-07
TES	7q31.2	0.290492725	1.98E-08	1.76E-07
CCNE1	19q12	0.290438455	1.99E-08	1.77E-07
NCAPG	4p15.31	0.290377755	2.00E-08	1.79E-07
GPR82	Xp11.4	0.290317339	2.02E-08	1.80E-07
SNN	16p13.13	0.290312168	2.02E-08	1.80E-07
ZBED5	11p15.4	0.290295193	2.02E-08	1.80E-07
FANK1	10q26.2	0.290283924	2.03E-08	1.80E-07
DLEU7	13q14.3	0.290279259	2.03E-08	1.80E-07
ABCB5	7p21.1	0.290223232	2.04E-08	1.81E-07
POP1	8q22.2	0.290163762	2.05E-08	1.82E-07
ICMT	1p36.31	0.290104605	2.07E-08	1.83E-07
TMEM119	12q23.3	0.290085204	2.07E-08	1.84E-07
LMX1B	9q33.3	0.290081093	2.07E-08	1.84E-07
B3GNT8	19q13.2	0.290069644	2.08E-08	1.84E-07
PROB1	5q31.2	0.289910954	2.12E-08	1.87E-07
CEP295	11q21	0.289892669	2.12E-08	1.87E-07
SSTR5	16p13.3	0.289824085	2.14E-08	1.89E-07
BANK1	4q24	0.289799539	2.14E-08	1.89E-07
B4GALNT2	17q21.32	0.289793073	2.14E-08	1.89E-07
CELF2	10p14	0.289760209	2.15E-08	1.90E-07
RAP2B	3q25.2	0.289754293	2.15E-08	1.90E-07
FUNDC1	Xp11.3	0.289751464	2.15E-08	1.90E-07
CROCC	1p36.13	0.289626206	2.19E-08	1.93E-07
RCSD1	1q24.2	0.289585825	2.20E-08	1.93E-07
ARMCX1	Xq22.1	0.289576823	2.20E-08	1.94E-07
NTM	11q25	0.289506277	2.22E-08	1.95E-07
RBM17	10p15.1	0.289457885	2.23E-08	1.96E-07
ACP5	19p13.2	0.289328107	2.26E-08	1.99E-07
APOBEC3C	22q13.1	0.289289269	2.27E-08	2.00E-07
KMT2A	11q23.3	0.289274884	2.28E-08	2.00E-07
ST18	8q11.23	0.28923769	2.29E-08	2.01E-07
ATP2A3	17p13.2	0.289213394	2.29E-08	2.01E-07
BMT2	7q31.1	0.28916684	2.31E-08	2.02E-07
SLC38A5	Xp11.23	0.289114261	2.32E-08	2.03E-07
LYPD6B	2q23.2	0.289054001	2.34E-08	2.04E-07
STYK1	12p13.2	0.289009897	2.35E-08	2.05E-07
FOXK1	7p22.1	0.288907579	2.38E-08	2.08E-07
TMEM63C	14q24.3	0.288859121	2.39E-08	2.09E-07
HMX3	10q26.13	0.288836055	2.40E-08	2.09E-07
VNN2	6q23.2	0.288827331	2.40E-08	2.09E-07
TRAFD1	12q24.13	0.288724707	2.43E-08	2.12E-07
ZNF335	20q13.12	0.288660921	2.45E-08	2.13E-07
OR13A1	10q11.21	0.28861293	2.46E-08	2.14E-07
PCDHA2	5q31.3	0.288575687	2.47E-08	2.15E-07
JAG1	20p12.2	0.28853772	2.48E-08	2.16E-07
SANBR	2p15	0.288466108	2.50E-08	2.18E-07
CFAP107	1p36.21	0.288397033	2.52E-08	2.19E-07
C6ORF132	6p21.1	0.288376739	2.53E-08	2.20E-07
PTTG3P	8q13.1	0.288363463	2.53E-08	2.20E-07
RALA	7p14.1	0.288363336	2.53E-08	2.20E-07
PLA2R1	2q23-q24	0.288349967	2.54E-08	2.20E-07
POC5	5q13.3	0.288284632	2.56E-08	2.22E-07
OBI1	13q31.1	0.288254539	2.56E-08	2.22E-07
TPM2	9p13.3	0.288249652	2.57E-08	2.22E-07
RNF41	12q13.3	0.288134682	2.60E-08	2.25E-07
ERO1A	14q22.1	0.288094558	2.61E-08	2.26E-07
TASOR2	10p15.1	0.288070896	2.62E-08	2.27E-07
CWC27	5q12.3	0.287996564	2.64E-08	2.29E-07
LIMS3	2q13	0.287946138	2.66E-08	2.30E-07
CCDC102B	18q22.1	0.287922379	2.66E-08	2.30E-07
RALGDS	9q34.13-q34.2	0.287887252	2.68E-08	2.31E-07
RAB33A	Xq26.1	0.287878769	2.68E-08	2.31E-07
DOK3	5q35.3	0.287773568	2.71E-08	2.34E-07
APAF1	12q23.1	0.287760965	2.71E-08	2.34E-07
OPRL1	20q13.33	0.28754519	2.78E-08	2.40E-07
FAM72D	1q21.1	0.287531429	2.79E-08	2.40E-07
PDLIM4	5q31.1	0.287525253	2.79E-08	2.40E-07
KIRREL1	1q23.1	0.2874901	2.80E-08	2.41E-07
NFATC1	18q23	0.287467496	2.81E-08	2.42E-07
TRPV6	7q34	0.287433309	2.82E-08	2.42E-07
AAK1	2p13.3	0.287433178	2.82E-08	2.42E-07
MYEF2	15q21.1	0.287378399	2.84E-08	2.44E-07
HSPB7	1p36.13	0.287341016	2.85E-08	2.45E-07
HLA-DQB2	6p21.32	0.287330848	2.85E-08	2.45E-07
MNX1	7q36.3	0.287298536	2.86E-08	2.46E-07
CRIP1	14q32.33	0.287279737	2.87E-08	2.46E-07
SLC16A9	10q21.2	0.287278832	2.87E-08	2.46E-07
CACNA2D2	3p21.31	0.287275696	2.87E-08	2.46E-07
CPAMD8	19p13.11	0.287252106	2.88E-08	2.46E-07
TASL	Xp21.2	0.287243288	2.88E-08	2.47E-07
TTC13	1q42.2	0.287176599	2.90E-08	2.48E-07
SIX2	2p21	0.287173652	2.91E-08	2.48E-07
FOXE1	9q22.33	0.28690911	3.00E-08	2.55E-07
TMEFF1	9q31.1	0.286850979	3.02E-08	2.57E-07
ARMC2	6q21	0.286709792	3.06E-08	2.61E-07
ZNF618	9q32	0.286668879	3.08E-08	2.62E-07
ZNF320	19q13.41	0.286666564	3.08E-08	2.62E-07
CA11	19q13.33	0.286625154	3.09E-08	2.63E-07
SLC6A10P	16p11.2	0.28661633	3.10E-08	2.63E-07
SNAP91	6q14.2	0.286610116	3.10E-08	2.63E-07
KCNK15	20q13.12	0.286533061	3.13E-08	2.65E-07
NAALAD2	11q14.3	0.286516063	3.13E-08	2.66E-07
CYBA	16q24.2	0.286499896	3.14E-08	2.66E-07
TCF3	19p13.3	0.286494237	3.14E-08	2.66E-07
KLHL6	3q27.1	0.286479577	3.15E-08	2.66E-07
CCR10	17q21.2	0.286417334	3.17E-08	2.68E-07
HOXC9	12q13.13	0.286388	3.18E-08	2.69E-07
RERE	1p36.23	0.286366407	3.19E-08	2.69E-07
LRRC37BP1	17q11.2	0.286282302	3.22E-08	2.72E-07
PTPRO	12p12.3	0.286275155	3.22E-08	2.72E-07
TFAP2A	6p24.3	0.286263542	3.23E-08	2.72E-07
EFNB1	Xq13.1	0.286249379	3.23E-08	2.73E-07
C8ORF48	8p22	0.286211125	3.25E-08	2.74E-07
SLC7A8	14q11.2	0.286170675	3.26E-08	2.75E-07
HOXC8	12q13.13	0.286150655	3.27E-08	2.75E-07
GUSBP3	5q13.2	0.286142126	3.27E-08	2.75E-07
CCND2	12p13.32	0.286033843	3.31E-08	2.79E-07
MICALL2	7p22.3	0.286029985	3.31E-08	2.79E-07
LINC01559	12p13.1	0.285878071	3.37E-08	2.83E-07
DROSHA	5p13.3	0.285864346	3.38E-08	2.83E-07
IL2RA	10p15.1	0.285863837	3.38E-08	2.83E-07
CDKL1	14q21.3	0.285850621	3.38E-08	2.84E-07
MFGE8	15q26.1	0.285846341	3.38E-08	2.84E-07
CYTIP	2q24.1	0.285772267	3.41E-08	2.86E-07
COA1	7p13	0.285766608	3.42E-08	2.86E-07
GAS7	17p13.1	0.285690476	3.45E-08	2.88E-07
HRH2	5q35.2	0.285548699	3.50E-08	2.93E-07
TACC3	4p16.3	0.285545928	3.50E-08	2.93E-07
ZNF280B	22q11.22	0.285456598	3.54E-08	2.96E-07
ELOVL1	1p34.2	0.285425299	3.55E-08	2.96E-07
LIN9	1q42.12	0.285389291	3.57E-08	2.98E-07
ZNF713	7p11.2	0.285384404	3.57E-08	2.98E-07
ATP2C2	16q24.1	0.285323975	3.59E-08	3.00E-07
LIMK2	22q12.2	0.285315473	3.60E-08	3.00E-07
ATP2B4	1q32.1	0.285250658	3.62E-08	3.02E-07
MX2	21q22.3	0.285068043	3.70E-08	3.08E-07
AHDC1	1p36.11-p35.3	0.285032806	3.71E-08	3.09E-07
ZNF761	19q13.42	0.284950244	3.75E-08	3.12E-07
MMP2	16q12.2	0.284888258	3.78E-08	3.14E-07
CPE	4q32.3	0.284878741	3.78E-08	3.14E-07
CRMP1	4p16.2	0.284865624	3.79E-08	3.14E-07
RASSF3	12q14.2	0.284768142	3.83E-08	3.18E-07
KLHL29	2p24.1	0.284748339	3.84E-08	3.18E-07
TESC	12q24.22	0.284633369	3.89E-08	3.22E-07
C14ORF39	14q23.1	0.284621817	3.89E-08	3.22E-07
TMEM61	1p32.3	0.284616322	3.90E-08	3.22E-07
PSAPL1	4p16.1	0.284575189	3.91E-08	3.24E-07
LIX1L	1q21.1	0.284562381	3.92E-08	3.24E-07
VIPR2	7q36.3	0.284559948	3.92E-08	3.24E-07
WDR82	3p21.2	0.284473131	3.96E-08	3.27E-07
TMSB15B	Xq22.2	0.2843897	4.00E-08	3.30E-07
SAMD14	17q21.33	0.284341204	4.02E-08	3.32E-07
TEP1	14q11.2	0.28433347	4.02E-08	3.32E-07
WIPF3	7p14.3	0.284326424	4.03E-08	3.32E-07
FAM83E	19q13.33	0.284318989	4.03E-08	3.32E-07
RAB9B	Xq22.2	0.284189617	4.09E-08	3.37E-07
LINC02904	8q24.3	0.284186773	4.09E-08	3.37E-07
ATN1	12p13.31	0.28418172	4.09E-08	3.37E-07
PYGB	20p11.21	0.284178633	4.10E-08	3.37E-07
SEMA3E	7q21.11	0.284168795	4.10E-08	3.37E-07
PPP4R1	18p11.22	0.284163972	4.10E-08	3.37E-07
CCDC66	3p14.3	0.284137223	4.11E-08	3.38E-07
CDC6	17q21.2	0.284134651	4.12E-08	3.38E-07
ARX	Xp21.3	0.284107012	4.13E-08	3.39E-07
KANSL2	12q13.11	0.284098643	4.13E-08	3.39E-07
SLC34A2	4p15.2	0.284092167	4.14E-08	3.39E-07
HOXC10	12q13.13	0.283980347	4.19E-08	3.43E-07
ZNF611	19q13.41	0.283949134	4.20E-08	3.44E-07
NAIP	5q13.2	0.283918618	4.22E-08	3.45E-07
STRN4	19q13.32	0.283814176	4.27E-08	3.49E-07
LCP2	5q35.1	0.283811089	4.27E-08	3.49E-07
PROM1	4p15.32	0.283796537	4.28E-08	3.49E-07
WNT10A	2q35	0.283785115	4.28E-08	3.50E-07
XKR6	8p23.1	0.283778684	4.29E-08	3.50E-07
CDC27	17q21.32	0.283703578	4.32E-08	3.53E-07
NIN	14q22.1	0.283685574	4.33E-08	3.53E-07
FAT3	11q14.3	0.283667657	4.34E-08	3.54E-07
CHST1	11p11.2	0.283661397	4.34E-08	3.54E-07
PACSIN1	6p21.3	0.283657788	4.35E-08	3.54E-07
LINC01091	4q28.1	0.283624592	4.36E-08	3.55E-07
SMARCA5	4q31.21	0.283606098	4.37E-08	3.56E-07
HOXA5	7p15.2	0.283563794	4.39E-08	3.57E-07
P3H4	17q21.2	0.283563402	4.39E-08	3.57E-07
MARS1	12q13.3	0.283531252	4.41E-08	3.58E-07
ADAM19	5q33.3	0.283529966	4.41E-08	3.58E-07
LRFN4	11q13.2	0.283504245	4.42E-08	3.59E-07
LINC00336	6p21.31	0.283473371	4.44E-08	3.60E-07
TPD52L2	20q13.33	0.283463864	4.44E-08	3.60E-07
DNMT3A	2p23.3	0.283433257	4.46E-08	3.61E-07
CLDN18	3q22.3	0.283402926	4.47E-08	3.62E-07
ICAM5	19p13.2	0.283364127	4.49E-08	3.63E-07
LAPTM5	1p35.2	0.283363555	4.49E-08	3.63E-07
SRSF2	17q25.2	0.283319573	4.52E-08	3.65E-07
MIER2	19p13.3	0.283296939	4.53E-08	3.66E-07
HAS2	8q24.13	0.283281235	4.54E-08	3.66E-07
CCNJ	10q24.1	0.28327482	4.54E-08	3.66E-07
DOCK2	5q35.1	0.283217978	4.57E-08	3.68E-07
PIF1	15q22.31	0.283178883	4.59E-08	3.70E-07
GRIP1	12q14.3	0.283141053	4.61E-08	3.71E-07
ARHGAP22	10q11.22-q11.23	0.283051824	4.66E-08	3.75E-07
PLCD3	17q21.31	0.283031137	4.67E-08	3.75E-07
SLFN11	17q12	0.283030733	4.67E-08	3.75E-07
COTL1	16q24.1	0.282964889	4.70E-08	3.78E-07
ADAM8	10q26.3	0.282942512	4.71E-08	3.78E-07
SSTR2	17q25.1	0.282902168	4.74E-08	3.80E-07
CLEC4A	12p13.31	0.282865351	4.75E-08	3.81E-07
POSTN	13q13.3	0.282815705	4.78E-08	3.83E-07
PTPRS	19p13.3	0.282728776	4.83E-08	3.87E-07
XPNPEP1	10q25.1	0.282717974	4.84E-08	3.87E-07
NDRG1	8q24.22	0.282658302	4.87E-08	3.89E-07
ST8SIA4	5q21.1	0.282645957	4.87E-08	3.90E-07
MAU2	19p13.11	0.282642099	4.88E-08	3.90E-07
ARHGAP15	2q22.2-q22.3	0.282621669	4.89E-08	3.90E-07
KIF7	15q26.1	0.282598374	4.90E-08	3.91E-07
SCG3	15q21.2	0.282592767	4.90E-08	3.91E-07
NCKAP5L	12q13.12	0.282571257	4.92E-08	3.92E-07
PIK3CG	7q22.3	0.282530472	4.94E-08	3.94E-07
COL6A4P1	3p25.1	0.282489907	4.96E-08	3.96E-07
TMPRSS4	11q23.3	0.282437875	4.99E-08	3.98E-07
UMODL1	21q22.3	0.282433362	4.99E-08	3.98E-07
CCR8	3p22.1	0.282342143	5.05E-08	4.01E-07
CHD5	1p36.31	0.282337832	5.05E-08	4.01E-07
SAE1	19q13.32	0.282286386	5.08E-08	4.04E-07
EPS8L3	1p13.3	0.282247662	5.10E-08	4.05E-07
SMARCA4	19p13.2	0.282151097	5.16E-08	4.09E-07
MCM10	10p13	0.282131549	5.17E-08	4.10E-07
FAM90A1	12p13.31	0.281991057	5.25E-08	4.16E-07
NEIL3	4q34.3	0.281934347	5.28E-08	4.19E-07
ADAMTS14	10q22.1	0.281919862	5.29E-08	4.19E-07
VANGL1	1p13.1	0.281918842	5.29E-08	4.19E-07
GNG2	14q22.1	0.281914212	5.30E-08	4.19E-07
HHIPL1	14q32.2	0.281858656	5.33E-08	4.22E-07
GARS1	7p14.3	0.281846568	5.34E-08	4.22E-07
DNAJC5	20q13.33	0.281841681	5.34E-08	4.22E-07
P3H1	1p34.2	0.281773522	5.38E-08	4.25E-07
ZNF70	22q11.23	0.281626659	5.47E-08	4.32E-07
ZNF286A	17p12	0.281510163	5.54E-08	4.37E-07
HOXA10	7p15.2	0.281462604	5.57E-08	4.39E-07
FANCE	6p21.31	0.281460762	5.57E-08	4.39E-07
PTPN7	1q32.1	0.281433499	5.59E-08	4.41E-07
POGK	1q24.1	0.28141498	5.60E-08	4.41E-07
MSANTD2	11q24.2	0.281399805	5.61E-08	4.42E-07
ME2	18q21.2	0.281328045	5.66E-08	4.45E-07
BMP8B	1p34.2	0.281287323	5.68E-08	4.47E-07
NEO1	15q24.1	0.281233137	5.72E-08	4.49E-07
LZTS1	8p21.3	0.281130513	5.78E-08	4.54E-07
DRAM1	12q23.2	0.281102992	5.80E-08	4.55E-07
BTF3L4	1p32.3	0.281066469	5.83E-08	4.57E-07
OPHN1	Xq12	0.281053113	5.84E-08	4.58E-07
UBTD2	5q35.1	0.281006283	5.87E-08	4.60E-07
DEF6	6p21.31	0.280984678	5.88E-08	4.61E-07
MFSD14B	9q22.32	0.280954586	5.90E-08	4.62E-07
TCIRG1	11q13.2	0.280941725	5.91E-08	4.62E-07
RGL4	22q11.23	0.280927208	5.92E-08	4.63E-07
SERPINB9	6p25.2	0.28088334	5.95E-08	4.65E-07
AREG	4q13.3	0.280840814	5.98E-08	4.67E-07
NUF2	1q23.3	0.280834729	5.98E-08	4.67E-07
C15ORF48	15q21.1	0.280832594	5.98E-08	4.67E-07
TMX3	18q22.1	0.280813381	5.99E-08	4.68E-07
LARS1	5q32	0.280804893	6.00E-08	4.68E-07
GLI3	7p14.1	0.280791922	6.01E-08	4.69E-07
SLC2A6	9q34.2	0.280776086	6.02E-08	4.69E-07
CNOT11	2q11.2	0.280768885	6.03E-08	4.69E-07
FIBIN	11p14.2	0.280761207	6.03E-08	4.70E-07
GNA15	19p13.3	0.280747794	6.04E-08	4.70E-07
AATK	17q25.3	0.280738535	6.05E-08	4.71E-07
C12ORF75	12q23.3	0.280717444	6.06E-08	4.71E-07
SNX6	14q13.1	0.280680664	6.09E-08	4.73E-07
SNHG4	5q31.2	0.280624288	6.12E-08	4.76E-07
ANK1	8p11.21	0.280542694	6.18E-08	4.80E-07
GPR132	14q32.33	0.280437349	6.25E-08	4.85E-07
BTC	4q13.3	0.280435072	6.26E-08	4.85E-07
CPD	17q11.2	0.280400055	6.28E-08	4.87E-07
MATN3	2p24.1	0.280371949	6.30E-08	4.88E-07
CDC25A	3p21.31	0.280368418	6.30E-08	4.88E-07
CAMK4	5q22.1	0.280353376	6.31E-08	4.89E-07
ANKS6	9q22.33	0.280269909	6.37E-08	4.93E-07
CLSPN	1p34.3	0.280200959	6.42E-08	4.97E-07
ZNF878	19p13.2	0.280143268	6.46E-08	5.00E-07
H2AC25	1q42.13	0.280082624	6.51E-08	5.03E-07
SHISA2	13q12.13	0.28006418	6.52E-08	5.04E-07
IL22RA2	6q23.3	0.280051155	6.53E-08	5.04E-07
CNTFR	9p13.3	0.280041235	6.54E-08	5.05E-07
SULF1	8q13.2-q13.3	0.280030453	6.55E-08	5.05E-07
ARHGAP39	8q24.3	0.280011052	6.56E-08	5.06E-07
PPP6R1	19q13.42	0.280006533	6.56E-08	5.06E-07
UBE2I	16p13.3	0.279979527	6.58E-08	5.07E-07
NTRK1	1q23.1	0.279933549	6.62E-08	5.09E-07
RPIA	2p11.2	0.2797905	6.72E-08	5.17E-07
AGTPBP1	9q21.33	0.279706891	6.79E-08	5.21E-07
ZEB2	2q22.3	0.279664967	6.82E-08	5.24E-07
CADM3	1q23.2	0.279566996	6.89E-08	5.29E-07
TENT5B	1p36.11	0.279552834	6.91E-08	5.29E-07
SPAG17	1p12	0.279507683	6.94E-08	5.32E-07
LIF	22q12.2	0.279470521	6.97E-08	5.34E-07
XYLT1	16p12.3	0.279437856	7.00E-08	5.35E-07
EPS15L1	19p13.11	0.279400818	7.02E-08	5.37E-07
DACT3	19q13.32	0.279360584	7.06E-08	5.39E-07
LRP4	11p11.2	0.279340118	7.07E-08	5.40E-07
TIAM2	6q25.2-q25.3	0.279324686	7.08E-08	5.41E-07
OSGIN2	8q21.3	0.279270416	7.13E-08	5.44E-07
RAB36	22q11.23	0.27918769	7.19E-08	5.49E-07
FLNC	7q32.1	0.279115983	7.25E-08	5.53E-07
NOL4L	20q11.21	0.279094489	7.27E-08	5.54E-07
MUC6	11p15.5	0.279091391	7.27E-08	5.54E-07
LINC01366	5q35.1	0.279090258	7.27E-08	5.54E-07
LRRN3	7q31.1	0.279070018	7.29E-08	5.55E-07
TROAP	12q13.12	0.279057966	7.30E-08	5.56E-07
SAMD13	1p31.1	0.27898146	7.36E-08	5.60E-07
BICDL2	16p13.3	0.278930397	7.40E-08	5.63E-07
SLC39A6	18q12.2	0.278918304	7.41E-08	5.64E-07
SLC7A10	19q13.11	0.278865665	7.46E-08	5.67E-07
FBXL7	5p15.1	0.278829826	7.49E-08	5.69E-07
PPP2CA	5q31.1	0.278790989	7.52E-08	5.71E-07
RASGRP1	15q14	0.278767398	7.54E-08	5.72E-07
LAIR1	19q13.42	0.278721544	7.58E-08	5.75E-07
OSM	22q12.2	0.278656489	7.63E-08	5.78E-07
MSI2	17q22	0.278583572	7.70E-08	5.83E-07
BAIAP2L2	22q13.1	0.278323135	7.92E-08	5.99E-07
CSNK2A1	20p13	0.278322106	7.92E-08	5.99E-07
KCTD1	18q11.2	0.278314647	7.93E-08	5.99E-07
POLQ	3q13.33	0.278276324	7.96E-08	6.02E-07
TTYH3	7p22.3	0.278195305	8.04E-08	6.07E-07
IQGAP3	1q22	0.278188361	8.04E-08	6.07E-07
TLR5	1q41	0.278178844	8.05E-08	6.07E-07
RECK	9p13.3	0.278170099	8.06E-08	6.08E-07
PAN3	13q12.2	0.27802375	8.19E-08	6.17E-07
B3GAT2	6q13	0.278000287	8.21E-08	6.18E-07
EIF2S3	Xp22.11	0.277936044	8.27E-08	6.22E-07
AGPAT4	6q26	0.277842825	8.36E-08	6.28E-07
LAMA4	6q21	0.277815158	8.38E-08	6.30E-07
ITPR1	3p26.1	0.277737997	8.45E-08	6.35E-07
FLNA	Xq28	0.277656463	8.53E-08	6.40E-07
ZNF665	19q13.42	0.277545439	8.64E-08	6.48E-07
LOXL2	8p21.3	0.277497254	8.68E-08	6.51E-07
TTLL7	1p31.1	0.277487548	8.69E-08	6.51E-07
HNRNPH3	10q21.3	0.277479765	8.70E-08	6.52E-07
CD3G	11q23.3	0.27746761	8.71E-08	6.52E-07
COL4A2	13q34	0.27742498	8.75E-08	6.55E-07
MTFR2	6q23.3	0.277387721	8.79E-08	6.58E-07
HJURP	2q37.1	0.277363508	8.81E-08	6.59E-07
ARAP2	4p14	0.277360165	8.82E-08	6.59E-07
RAP1B	12q15	0.277337274	8.84E-08	6.60E-07
HOXD1	2q31.1	0.277318522	8.86E-08	6.62E-07
KCNG3	2p21	0.277192416	8.98E-08	6.70E-07
ANAPC7	12q24.11	0.277101161	9.07E-08	6.77E-07
TOP1	20q12	0.277078784	9.10E-08	6.78E-07
FAM166C	2p23.3	0.277057828	9.12E-08	6.79E-07
TMEM26	10q21.2	0.277040896	9.13E-08	6.80E-07
PCDHB18P	5q31.3	0.277011509	9.16E-08	6.82E-07
MALAT1	11q13.1	0.276974102	9.20E-08	6.85E-07
FAHD2B	2q11.2	0.276956116	9.22E-08	6.86E-07
TNFAIP8	5q23.1	0.276949153	9.23E-08	6.86E-07
NCKAP1	2q32.1	0.276850902	9.33E-08	6.93E-07
SH3TC1	4p16.1	0.276796374	9.39E-08	6.97E-07
SPATC1L	21q22.3	0.27675445	9.43E-08	7.00E-07
KCNK12	2p16.3	0.276745675	9.44E-08	7.00E-07
SH3BGRL3	1p36.11	0.276698123	9.49E-08	7.03E-07
NBEA	13q13.3	0.276690735	9.50E-08	7.04E-07
ZNF154	19q13.43	0.276685298	9.50E-08	7.04E-07
PI3	20q13.12	0.276592171	9.60E-08	7.11E-07
[truncated: 17,948 more rows]
